# Supplementary material for: Concentration-Dependent Recruitment of Mammalian Odorant Receptors
Source: eNeuro. 2020 Apr 15;7(2):ENEURO.0103-19.2019. doi: 10.1523/ENEURO.0103-19.2019 (PMC7189481; doi:10.1523/ENEURO.0103-19.2019)
Supplement: Extended Data Figure 2-7. — Differential expression data for 0.1% TMT. Download Figure 2-7, XLSX file. [file enu-eN-NWR-0103-19-s14.xlsx]

## Sheet: Table 0.1percentTMT
	EdgeR DE analysis						Read counts
id	logFoldChange	PValueRaw	PValueFDRadjusted	baseMean	baseMeanA	baseMeanB	No1	No2	No3	TMT1	TMT2	TMT3
Olfr1395	2.93316	2.95332e-57	3.21321e-54	1125.25	279.257	1971.24	263	195	354	1924	1555	2734
Olfr1297	3.19335	1.25931e-27	6.85067e-25	201.672	40.9279	362.416	38	43	40	345	282	519
Olfr165	3.16555	1.28993e-22	4.67815e-20	119.752	24.953	214.55	27	17	29	171	162	356
Olfr186	2.86731	7.20138e-16	1.95878e-13	139.77	35.3104	244.229	40	48	19	256	193	316
Olfr531	1.32464	5.69396e-14	1.23901e-11	674.181	395.914	952.447	393	394	384	943	818	1213
Olfr164	2.71262	8.70864e-14	1.57917e-11	83.4949	21.8517	145.138	23	23	19	84	149	227
Olfr196	1.91231	1.44253e-08	2.2421e-06	85.22	36.6567	133.783	33	30	44	171	81	168
Olfr1352	1.41342	6.24126e-07	8.48811e-05	120.459	68.4426	172.476	86	40	75	206	97	245
Olfr61	1.5937	8.37522e-07	0.000101247	131.7	66.4629	196.937	59	90	50	126	194	304
Olfr527	0.910613	1.12396e-05	0.00122287	456.664	323.075	590.253	332	348	281	461	574	816
Olfr110	0.952126	1.49681e-05	0.00148048	381.339	268.18	494.498	224	287	279	466	420	666
Olfr176	6.41265	0.000243486	0.022076	6.08441	0	12.1688	0	0	0	0	0	45
Olfr376	1.1368	0.000279438	0.0233868	166.123	106.01	226.237	87	120	106	251	146	320
Olfr31	0.998293	0.000487332	0.0378727	126.929	86.9907	166.867	77	80	98	164	117	250
Olfr56	0.965467	0.000577987	0.0419233	176.209	121.856	230.562	146	135	85	291	180	239
Olfr1353	1.25665	0.00076382	0.0512102	53.5622	32.4328	74.6916	27	38	31	85	65	80
Olfr1276	-1.1871	0.00080016	0.0512102	93.3038	126.348	60.2596	173	87	115	101	17	72
Olfr449	0.661925	0.00112906	0.0682456	644.262	520.689	767.834	369	548	606	753	718	907
Olfr220	0.684456	0.0012291	0.07038	365.434	287.878	442.991	306	256	288	463	369	549
Olfr739	0.975569	0.00129375	0.07038	101.897	71.3177	132.475	100	56	57	139	99	179
Olfr550	-0.979805	0.00145996	0.0756398	85.2549	114.834	55.6761	100	96	139	52	36	91
Olfr1360	5.31384	0.00161799	0.080017	2.44833	0	4.89667	0	0	0	8	0	8
Olfr281	-0.738761	0.00269751	0.127604	366.083	454.691	277.475	623	316	411	397	116	366
Olfr177	1.39636	0.00300879	0.136189	44.2501	23.5648	64.9355	20	22	27	100	54	40
Olfr463	0.715456	0.00312933	0.136189	239.352	187.023	291.682	161	168	218	281	220	423
Olfr285	-0.868024	0.00352442	0.147484	409.635	527.826	291.444	619	554	406	280	161	504
Olfr1084	3.43083	0.00383769	0.154645	5.24478	0.960938	9.52863	3	0	0	8	14	6
Olfr1433	1.79677	0.00424363	0.164895	13.9692	6.30377	21.6345	7	8	4	17	26	23
Olfr1258	-0.618566	0.00561125	0.210519	455.673	573.37	337.976	382	502	775	318	284	460
Olfr136	0.714998	0.00610323	0.221344	197.053	152.953	241.153	172	171	115	223	243	278
Olfr1475	4.28826	0.015166	0.532276	1.18854	0	2.37709	0	0	0	3	0	5
Olfr1384	-0.624886	0.0157948	0.537022	598.715	703.478	493.951	758	698	633	829	309	357
Olfr114	-2.8299	0.01644	0.542023	3.258	5.8761	0.639903	5	11	2	0	1	1
Olfr652	0.940877	0.0173605	0.555536	39.5876	28.0527	51.1224	28	21	33	54	35	73
Olfr202	1.07323	0.0181165	0.563164	29.6165	19.5006	39.7323	22	19	17	39	40	43
Olfr62	0.7377	0.0189936	0.57403	83.1088	62.9429	103.275	62	55	68	73	81	179
Olfr330	0.656144	0.0212333	0.624375	140.06	110.442	169.678	102	113	111	144	127	272
Olfr5	0.89786	0.0234996	0.644351	45.7582	32.6423	58.8741	33	42	23	74	47	60
Olfr148	2.63721	0.0240967	0.644351	8.85829	5.12857	12.588	0	16	0	14	16	7
Olfr603	-2.04857	0.02428	0.644351	5.32672	8.76156	1.89189	12	6	8	1	2	3
Olfr214	-0.973617	0.0242816	0.644351	43.2965	59.9295	26.6636	107	38	36	29	19	36
Olfr644	0.7264	0.0263517	0.671231	78.7439	59.5733	97.9146	65	52	59	114	52	147
Olfr397	0.850778	0.0266593	0.671231	179.453	136.43	222.475	145	213	58	164	217	319
Olfr1	-0.617383	0.0271454	0.671231	116.979	143.977	89.9803	174	141	115	92	86	99
Olfr707	-0.84788	0.0311603	0.738151	58.319	79.432	37.206	140	32	65	43	28	45
Olfr888	3.02861	0.0312086	0.738151	1.8673	0.320313	3.4143	1	0	0	2	3	6
Olfr963	1.47192	0.0322057	0.745527	14.3941	8.76401	20.0242	1	17	8	13	29	18
Olfr849	-0.783926	0.0332949	0.754684	49.9858	63.6858	36.2858	68	63	58	32	43	35
Olfr288	-0.641177	0.0360096	0.798679	151.187	183.268	119.107	205	131	202	185	62	122
Olfr1225	-0.858918	0.036704	0.798679	56.4927	75.2075	37.7778	127	54	46	39	23	59
Olfr1388	0.663939	0.0375796	0.801697	70.3328	55.6784	84.9871	51	48	64	61	77	132
Olfr309	0.43606	0.0413556	0.859293	549.333	470.436	628.23	520	419	453	468	491	1061
Olfr809	1.10937	0.0418589	0.859293	28.5384	17.5278	39.549	13	16	22	30	61	25
Olfr1282	3.82043	0.0437608	0.881698	1.10846	0	2.21691	0	0	0	0	6	0
Olfr2	-3.79511	0.0475837	0.939908	0.82801	1.65602	0	2	2	1	0	0	0
Olfr1342	0.647533	0.0498437	0.939908	97.2145	79.6526	114.776	76	120	45	112	109	134
Olfr10	3.80006	0.0503666	0.939908	0.881984	0	1.76397	0	0	0	3	2	0
Olfr1066	1.8947	0.0508763	0.939908	4.36867	1.65602	7.08133	2	2	1	3	12	6
Olfr612	0.871474	0.0509693	0.939908	30.0371	21.8001	38.2742	23	17	24	38	26	58
Olfr747	0.65102	0.0544772	0.987854	63.7208	50.7549	76.6866	47	67	38	59	82	97
Olfr859	0.884393	0.0568247	0.9958	32.3585	23.2376	41.4794	30	25	15	30	45	54
Olfr1132	1.06313	0.0579398	0.9958	17.6667	11.9684	23.365	15	6	14	29	13	32
Olfr1506	2.0561	0.0595598	0.9958	9.95401	6.08594	13.8221	19	0	0	27	0	17
Olfr178	1.16428	0.060009	0.9958	14.431	8.76245	20.0996	8	10	8	10	21	33
Olfr1295	0.653884	0.0600984	0.9958	77.7609	60.1597	95.3621	59	68	52	61	78	169
Olfr1499	1.67228	0.062641	0.9958	6.7716	3.74105	9.80215	0	7	4	5	8	19
Olfr1392	-0.467495	0.063049	0.9958	477.077	571.746	382.408	465	421	769	482	287	413
Olfr552	0.605181	0.0639215	0.9958	134.106	110.826	157.385	72	136	118	173	124	194
Olfr541	0.527977	0.0639398	0.9958	126.723	105.789	147.657	103	115	96	123	130	213
Olfr9	0.663022	0.064068	0.9958	75.2923	59.8963	90.6883	44	81	53	78	65	148
Olfr1031	0.879244	0.0674413	1	25.9328	18.863	33.0025	16	16	23	25	34	44
Olfr1306	-1.18575	0.0683389	1	11.4312	16.1896	6.67285	13	20	15	7	5	9
Olfr462	0.594713	0.0688311	1	83.3887	67.2106	99.5669	73	69	58	88	71	160
Olfr362	0.526172	0.0710502	1	101.926	85.347	118.505	69	49	127	90	56	248
Olfr915	-2.78765	0.0716164	1	2.7746	4.81023	0.73897	0	8	6	0	2	0
Olfr497	1.92172	0.0728396	1	6.74546	3.20357	10.2873	8	2	0	7	6	21
Olfr770	1.27766	0.0795046	1	10.7697	5.82451	15.715	5	5	7	4	22	23
Olfr536	-0.365447	0.0819962	1	2211.97	2481.66	1942.27	2111	2538	2650	1710	1089	3534
Olfr984	0.800585	0.0824184	1	28.2092	20.995	35.4233	25	23	15	40	34	34
Olfr458	1.27355	0.084048	1	9.16418	5.34305	12.9853	3	9	4	13	18	7
Olfr801	0.658175	0.0842358	1	62.5264	48.8821	76.1707	62	45	39	53	62	130
Olfr743	-0.646565	0.0862242	1	1157.7	1401.35	914.045	1251	2003	958	808	421	1784
Olfr780	0.818096	0.0890784	1	27.4488	21.1083	33.7894	19	13	29	33	28	45
Olfr791	0.615435	0.0922837	1	57.1366	46.1669	68.1063	45	36	54	48	77	86
Olfr424	0.781509	0.0925174	1	27.7972	21.0514	34.5429	23	17	22	37	30	40
Olfr986	1.25163	0.0927773	1	10.1411	6.35667	13.9255	11	3	5	10	16	17
Olfr765	-1.17975	0.093184	1	9.27601	13.1468	5.40525	8	12	18	3	6	8
Olfr740	-0.590747	0.0936205	1	666.772	789.364	544.181	870	1000	508	396	314	1083
Olfr1361	0.509114	0.093898	1	86.8699	74.0077	99.732	58	76	83	94	82	138
Olfr356	2.12192	0.0945127	1	1.99975	0.640848	3.35866	1	1	0	4	1	6
Olfr875	0.707313	0.0959201	1	40.3024	33.3486	47.2562	11	44	42	31	48	70
Olfr568	1.87742	0.0963518	1	4.19239	2.2962	6.08858	6	0	1	5	6	8
Olfr995	1.09168	0.0972109	1	13.019	8.97872	17.0593	3	11	12	14	12	29
Olfr1413	0.767637	0.100057	1	30.3462	23.5064	37.186	21	36	14	34	37	44
Olfr554	0.718823	0.102371	1	31.9682	25.1112	38.8251	31	17	26	36	33	53
Olfr1377	0.694971	0.103382	1	55.5789	48.262	62.8958	37	19	81	61	56	79
Olfr744	0.809351	0.103744	1	24.794	19.1864	30.4016	13	13	29	21	27	49
Olfr419	0.494016	0.104352	1	115.562	96.9171	134.206	103	99	86	107	104	219
Olfr486	1.62753	0.106243	1	5.11536	2.08436	8.14635	1	2	3	1	16	7
Olfr1418	0.617879	0.108144	1	49.6609	40.9343	58.3876	29	38	52	63	50	68
Olfr1181	-1.88323	0.108247	1	4.20982	5.98588	2.43376	5	2	10	0	0	9
Olfr1156	1.94241	0.110848	1	3.27463	1.44329	5.10598	1	0	3	5	7	3
Olfr663	-2.68558	0.110973	1	0.347318	0.694637	0	1	0	1	0	0	0
Olfr994	0.499652	0.112737	1	82.3107	70.1046	94.5168	71	52	82	68	89	142
Olfr730	-0.629701	0.11321	1	41.2116	50.4365	31.9867	57	42	50	44	21	34
Olfr912	0.748073	0.114004	1	47.6789	35.3696	59.9882	45	21	38	25	58	111
Olfr578	0.415029	0.114358	1	183.949	164.38	203.518	119	144	214	170	166	311
Olfr1205	-0.665444	0.116206	1	42.1833	52.0375	32.3291	55	56	44	34	18	52
Olfr441	0.525524	0.11712	1	62.4582	52.1426	72.7739	56	60	40	60	80	84
Olfr819	0.982371	0.118299	1	15.5392	11.8564	19.2219	25	5	6	25	15	19
Olfr259	1.33926	0.12135	1	5.31039	3.15332	7.46746	2	2	5	5	9	9
Olfr688	2.58408	0.122611	1	0.319952	0	0.639903	0	0	0	0	1	1
Olfr213	-0.46136	0.122888	1	207.497	256.913	158.081	497	111	166	207	82	211
Olfr457	0.990594	0.123205	1	17.1751	12.3964	21.9539	6	21	10	24	16	29
Olfr857	0.934881	0.12496	1	26.5943	19.8156	33.3731	27	29	5	24	33	48
Olfr908	2.61612	0.125233	1	0.369485	0	0.73897	0	0	0	0	2	0
Olfr293	0.663689	0.125636	1	42.4364	33.015	51.8577	40	35	24	37	41	89
Olfr628	0.91645	0.125705	1	14.1809	10.4211	17.9407	8	7	15	16	14	27
Olfr814	0.881969	0.126646	1	15.6503	11.2718	20.0287	13	14	7	19	22	20
Olfr1323	0.874619	0.127366	1	24.8175	19.2387	30.3964	20	5	30	49	15	30
Olfr818	-0.788524	0.127555	1	22.3974	28.3673	16.4274	35	29	21	14	22	13
Olfr133	0.570251	0.129463	1	44.364	37.0848	51.6432	33	29	46	45	44	74
Olfr1490	0.873641	0.131554	1	22.1737	15.545	28.8024	19	19	9	14	35	41
Olfr742	-0.508602	0.132225	1	626.754	721.702	531.805	778	868	519	453	260	1039
Olfr830	1.67586	0.132689	1	3.4068	1.977	4.8366	0	5	1	4	5	6
Olfr1183	-0.608476	0.132844	1	38.3244	47.0707	29.5781	53	39	47	25	24	45
Olfr923	0.450208	0.133147	1	84.5932	72.989	96.1973	63	76	76	74	88	142
Olfr24	0.364819	0.133787	1	238.666	214.325	263.006	178	214	237	243	209	380
Olfr50	1.56852	0.134003	1	4.14423	2.2433	6.04516	2	5	0	3	7	9
Olfr1032	0.716782	0.135085	1	27.388	21.6967	33.0792	14	21	28	31	25	49
Olfr392	0.633059	0.135264	1	72.8237	58.1185	87.5288	86	51	38	50	86	143
Olfr1218	-0.767263	0.135732	1	27.7664	34.3558	21.1769	38	26	37	27	6	36
Olfr1415	0.422472	0.136487	1	161.103	142.046	180.161	172	165	91	182	170	204
Olfr987	0.525276	0.13694	1	61.3312	50.4981	72.1643	42	42	63	36	72	123
Olfr1383	-0.4404	0.139706	1	94.3168	109.725	78.9086	144	112	74	108	61	72
Olfr596	0.514725	0.139936	1	53.5982	45.3113	61.8851	42	41	50	52	55	88
Olfr768	0.865605	0.142313	1	25.1751	20.0808	30.2695	34	24	4	27	35	30
Olfr878	0.539582	0.142556	1	58.0456	48.3444	67.7467	71	39	35	82	38	95
Olfr810	0.501364	0.144485	1	82.9217	69.9891	95.8543	87	52	68	64	89	152
Olfr1248	-2.4492	0.147134	1	0.320535	0.641071	0	0	2	0	0	0	0
Olfr702	-0.549067	0.148429	1	54.7611	63.1968	46.3255	100	33	55	89	16	37
Olfr203	0.90091	0.148504	1	14.1352	10.2048	18.0655	13	6	11	17	20	18
Olfr1230	-2.4441	0.148549	1	0.320313	0.640625	0	2	0	0	0	0	0
Olfr1246	0.584624	0.149128	1	50.6595	41.8266	59.4924	59	40	27	46	57	84
Olfr273	-0.473657	0.149403	1	84.6722	99.1632	70.1812	112	83	98	48	57	121
Olfr1044	0.512372	0.149702	1	52.6982	44.0847	61.3117	34	44	51	37	60	98
Olfr745	0.340375	0.153902	1	233.259	212.894	253.624	150	220	252	197	232	372
Olfr1214	0.660764	0.154047	1	35.6629	29.2745	42.0514	28	47	14	36	41	54
Olfr853	2.42922	0.155453	1	1.63821	0.320535	2.95588	0	1	0	0	8	0
Olfr434	0.961018	0.156023	1	11.6055	7.69416	15.5168	4	13	6	4	20	25
Olfr630	0.487914	0.156339	1	57.6413	49.5398	65.7429	37	37	69	42	52	119
Olfr669	0.42063	0.156423	1	160.505	138.486	182.524	132	160	120	129	161	292
Olfr979	0.630139	0.157718	1	31.5033	25.3275	37.679	26	18	30	49	23	46
Olfr315	0.425709	0.158577	1	113.781	99.5257	128.035	116	114	69	145	99	155
Olfr1324	0.449632	0.158609	1	81.3837	69.9911	92.7763	68	78	62	81	73	141
Olfr773	2.35464	0.160663	1	0.270418	0	0.540836	0	0	0	0	0	2
Olfr346	-0.542636	0.160933	1	59.7784	71.2188	48.3379	71	80	61	54	26	75
Olfr358	-0.740778	0.161124	1	31.4617	38.3614	24.5621	38	42	34	21	9	52
Olfr32	0.465074	0.162131	1	70.6674	62.5181	78.8167	67	37	78	78	68	100
Olfr460	1.02105	0.163343	1	21.5832	14.9655	28.2008	4	17	22	44	21	20
Olfr564	-2.07319	0.163538	1	1.01275	1.65602	0.369485	2	2	1	0	1	0
Olfr193	0.789078	0.163854	1	18.1205	13.8352	22.4058	17	18	7	22	22	25
Olfr1109	1.85836	0.165113	1	1.83186	0.961606	2.70211	0	3	0	2	4	2
Olfr561	0.422283	0.1652	1	129.584	113.32	145.849	106	139	93	162	111	183
Olfr547	1.59236	0.169961	1	3.77676	1.92232	5.63121	4	2	0	2	9	6
Olfr601	0.420023	0.170053	1	78.6878	68.9321	88.4436	62	55	84	79	58	148
Olfr694	0.523192	0.170787	1	57.7284	48.4629	66.9939	32	69	43	44	55	117
Olfr738	0.617696	0.17166	1	36.9042	30.6708	43.1375	18	45	28	42	34	60
Olfr1212	0.498352	0.173295	1	79.8613	70.8968	88.8258	48	123	43	72	86	120
Olfr1133	0.806344	0.17338	1	16.3795	12.4988	20.2601	19	13	6	23	16	24
Olfr448	0.523516	0.17365	1	43.3307	36.551	50.1104	34	24	48	36	35	92
Olfr225	-0.838069	0.173846	1	12.5809	16.2432	8.91861	14	18	16	5	10	13
Olfr52	0.427897	0.174037	1	88.0108	77.2667	98.7549	59	84	84	99	74	139
Olfr1049	1.15426	0.174283	1	5.63805	3.36583	7.91026	4	3	3	4	6	16
Olfr70	-0.947819	0.175113	1	9.03182	12.0752	5.98848	9	17	10	6	7	5
Olfr1305	-0.693811	0.175795	1	21.2178	26.7719	15.6637	22	23	33	12	13	25
Olfr600	0.858775	0.177621	1	12.3704	8.76223	15.9786	9	9	8	13	10	29
Olfr1425	-0.544833	0.178114	1	43.1608	52.1393	34.1822	61	62	34	26	37	43
Olfr800	0.550801	0.178821	1	46.5133	38.2494	54.7772	48	41	26	36	63	71
Olfr1307	0.64139	0.179176	1	27.532	22.4432	32.6208	14	28	24	29	30	43
Olfr826	1.0818	0.181699	1	13.7903	8.91984	18.6607	16	6	5	6	23	30
Olfr1239	0.823093	0.182876	1	15.9231	11.8589	19.9873	14	16	6	15	19	29
Olfr481	0.505537	0.183016	1	48.1298	40.9737	55.2858	54	40	29	54	47	72
Olfr374	0.823851	0.183426	1	16.3165	11.4341	21.199	9	15	10	11	15	44
Olfr574	1.49676	0.183432	1	4.27037	2.29642	6.24433	5	1	1	2	7	11
Olfr1454	0.768204	0.184226	1	22.8001	16.616	28.9842	21	11	17	22	42	22
Olfr965	0.83408	0.184832	1	11.876	8.86936	14.8827	11	5	10	19	11	16
Olfr69	0.559189	0.186276	1	36.9666	30.0255	43.9077	27	41	22	25	54	57
Olfr1450	1.28448	0.187574	1	3.5099	2.08413	4.93566	2	1	3	4	6	5
Olfr1444	0.843911	0.187741	1	10.9496	8.0138	13.8855	8	10	6	15	12	16
Olfr1357	0.416988	0.187761	1	85.9362	77.167	94.7054	53	71	100	90	86	119
Olfr1153	1.96985	0.18817	1	1.50856	0.641071	2.37605	0	2	0	4	2	1
Olfr1491	0.462152	0.18897	1	59.9171	51.6164	68.2179	43	55	54	77	60	73
Olfr1459	0.46541	0.189665	1	58.3171	49.8457	66.7885	53	57	39	51	67	91
Olfr954	1.04261	0.190316	1	9.26444	7.04933	11.4796	11	11	0	14	13	7
Olfr681	0.422433	0.191974	1	81.2895	70.6351	91.944	65	76	68	96	62	134
Olfr447	-0.912366	0.192996	1	14.2145	17.1014	11.3277	15	8	26	3	3	34
Olfr145	-0.370103	0.197483	1	99.952	113.792	86.1124	131	126	84	104	82	75
Olfr1417	0.358384	0.197786	1	114.17	101.94	126.401	104	109	90	136	119	133
Olfr1124	0.496735	0.198117	1	44.5301	37.9311	51.1292	48	33	32	45	47	68
Olfr30	0.290134	0.19938	1	304.499	281.605	327.392	230	268	326	279	268	492
Olfr1222	0.325361	0.199982	1	199.857	182.963	216.75	154	167	214	200	177	307
Olfr290	-0.347247	0.202084	1	170.049	192.933	147.165	204	175	191	163	99	203
Olfr1355	-1.20989	0.202085	1	6.25647	7.96001	4.55293	8	11	5	9	4	0
Olfr218	0.613701	0.202261	1	27.0782	22.23	31.9263	15	24	26	30	25	46
Olfr180	0.501985	0.202293	1	51.8007	43.9723	59.6292	36	58	37	56	43	91
Olfr1255	0.581398	0.202347	1	29.6913	23.9362	35.4464	23	26	22	23	41	46
Olfr187	0.537698	0.202738	1	33.9275	28.5359	39.3191	22	25	36	27	39	58
Olfr1402	1.13276	0.20452	1	4.5767	2.93794	6.21547	3	5	1	4	8	7
Olfr524	-0.346298	0.205222	1	323.484	365.083	281.885	331	424	329	366	191	319
Olfr1445	-1.66008	0.206051	1	1.53516	2.45824	0.612084	3	0	4	1	0	1
Olfr1232	0.430765	0.206095	1	59.5461	51.8772	67.2149	50	64	41	58	69	81
Olfr1260	-0.361579	0.206931	1	133.898	154.704	113.093	218	134	112	122	93	137
Olfr613	0.709436	0.20729	1	21.4575	16.3481	26.5669	16	21	12	37	15	31
Olfr1289	1.26091	0.207387	1	6.61182	4.22053	9.00311	1	11	1	1	11	17
Olfr978	-0.634687	0.207795	1	23.9812	29.4404	18.5219	27	31	29	21	19	16
Olfr593	1.60546	0.20908	1	3.29382	1.977	4.61064	0	5	1	5	2	8
Olfr959	0.480473	0.209301	1	72.0364	61.2314	82.8415	48	80	54	85	49	132
Olfr1321	-0.37939	0.209905	1	170.525	202.563	138.488	336	107	162	150	89	201
Olfr772	-0.514916	0.210354	1	35.9593	43.0113	28.9073	43	41	43	29	28	32
Olfr48	-0.459442	0.21267	1	54.9451	64.4303	45.46	77	61	54	46	30	69
Olfr74	-1.78187	0.213249	1	2.11462	3.20424	1.025	5	5	0	3	0	0
Olfr597	0.364435	0.213849	1	178.737	159.153	198.321	168	185	123	165	169	294
Olfr916	0.627767	0.214739	1	22.9077	18.3273	27.4881	16	19	19	24	20	44
Olfr1505	0.555081	0.217882	1	30.4866	26.1893	34.7839	11	24	40	19	29	65
Olfr173	0.586806	0.218593	1	28.0719	22.4923	33.6516	25	23	19	47	22	35
Olfr1461	0.632434	0.222699	1	20.2222	16.1892	24.2553	15	18	15	20	23	33
Olfr885	1.28187	0.225667	1	6.31384	4.27432	8.35336	1	10	2	13	4	9
Olfr1337	-1.51287	0.227363	1	1.32121	2.03034	0.612084	2	2	2	1	0	1
Olfr1173	0.534841	0.228354	1	34.1648	28.6356	39.6941	38	21	26	32	31	64
Olfr1219	-0.38959	0.22852	1	93.5878	107.022	80.1533	100	109	107	98	48	107
Olfr410	0.519272	0.229025	1	37.9868	31.7891	44.1846	39	24	31	29	43	68
Olfr802	0.877265	0.229389	1	10.1545	8.11718	12.1917	17	6	2	14	12	11
Olfr530	-0.398051	0.229584	1	84.1449	96.8142	71.4756	82	122	84	52	59	118
Olfr727	-0.244686	0.230075	1	705.751	771.494	640.008	859	710	718	658	405	982
Olfr1204	-0.539539	0.23333	1	30.139	36.6447	23.6333	57	27	26	31	17	25
Olfr1512	0.486191	0.234414	1	44.5405	37.0286	52.0525	34	36	39	53	26	90
Olfr347	-1.19519	0.235559	1	4.76259	6.4658	3.05938	4	8	7	6	2	1
Olfr13	-0.467855	0.23617	1	52.048	60.5838	43.5122	77	49	54	37	25	80
Olfr624	-0.817819	0.236826	1	10.7547	13.5713	7.93808	14	12	14	3	7	16
Olfr1167	-0.645728	0.237585	1	24.1822	29.9151	18.4493	40	30	20	11	20	27
Olfr308	0.381933	0.241164	1	65.1711	58.1871	72.155	59	49	63	68	68	88
Olfr1318	0.3967	0.241475	1	61.973	55.7898	68.1562	34	63	66	54	65	95
Olfr1176	0.337973	0.241803	1	127.31	113.696	140.924	117	114	106	99	153	187
Olfr710	0.45621	0.241815	1	40.034	34.5701	45.498	32	35	35	43	38	62
Olfr488	0.458474	0.241963	1	68.9955	60.6902	77.3008	53	92	38	81	56	107
Olfr1411	0.381144	0.243064	1	164.807	149.935	179.679	94	208	142	179	140	247
Olfr1019	0.435974	0.243958	1	63.5357	55.2474	71.824	64	36	62	44	71	113
Olfr1148	0.452033	0.244364	1	43.8505	38.4692	49.2318	27	58	30	39	54	59
Olfr279	0.336023	0.24705	1	126.854	114.394	139.315	103	129	107	161	114	156
Olfr1087	0.592036	0.24736	1	27.6967	22.9762	32.4172	26	13	28	24	37	39
Olfr197	0.734895	0.24835	1	13.0811	10.2022	15.9599	15	11	5	13	18	18
Olfr643	0.578216	0.248994	1	26.7678	21.6883	31.8473	32	17	16	39	15	48
Olfr320	1.30066	0.249319	1	3.11997	2.24241	3.99752	6	1	0	5	4	3
Olfr212	-0.317543	0.249427	1	343.153	404.922	281.383	725	262	237	313	265	283
Olfr316	0.655794	0.250485	1	26.1228	22.8678	29.3779	10	45	14	27	26	39
Olfr884	0.415647	0.250595	1	53.2481	46.0611	60.4352	37	46	52	38	75	73
Olfr1040	1.7634	0.250882	1	2.12732	1.12297	3.13167	0	0	3	6	0	4
Olfr544	0.296769	0.251265	1	197.147	181.749	212.544	110	192	227	133	180	372
Olfr1251	0.390039	0.251602	1	66.078	58.3417	73.8142	60	66	48	79	55	98
Olfr95	-0.946224	0.25184	1	19.7109	24.8357	14.5862	41	26	9	8	5	37
Olfr720	0.348961	0.251945	1	150.772	129.544	172.001	177	121	91	286	92	149
Olfr854	1.86796	0.252039	1	0.184743	0	0.369485	0	0	0	0	1	0
Olfr1105	0.420694	0.253099	1	45.9746	40.1254	51.8237	38	44	37	44	52	65
Olfr594	0.352882	0.253657	1	94.5972	83.9468	105.248	57	101	89	63	89	188
Olfr1242	0.336633	0.258203	1	87.7485	78.698	96.799	84	81	69	85	108	103
Olfr1113	-0.84437	0.258572	1	8.81667	11.3289	6.3044	8	11	14	6	2	13
Olfr936	0.971877	0.259152	1	4.41886	2.99173	5.84599	3	4	2	4	7	7
Olfr239	-0.340131	0.259389	1	93.1821	105.198	81.1659	108	114	91	59	89	104
Olfr292	0.438236	0.260929	1	43.0984	38.0948	48.1021	47	24	41	44	39	69
Olfr372	-0.626085	0.262683	1	20.9487	26.8301	15.0673	12	25	40	14	11	23
Olfr1243	-0.404873	0.26285	1	51.9299	59.6238	44.2361	60	70	48	31	53	52
Olfr1231	0.531843	0.263409	1	28.6173	23.5077	33.7269	25	25	20	21	36	49
Olfr1131	0.92235	0.263451	1	5.24753	3.79439	6.70067	2	4	5	6	6	9
Olfr1412	-0.301705	0.264128	1	228.635	252.884	204.386	257	239	251	282	157	185
Olfr229	0.542645	0.264351	1	28.9311	23.9874	33.8749	25	30	17	28	27	53
Olfr677	0.505602	0.264899	1	35.2265	29.6003	40.8527	34	21	32	25	45	58
Olfr970	0.467692	0.265502	1	33.7675	29.0648	38.4702	33	25	28	40	32	48
Olfr1110	0.298815	0.266071	1	154.957	142.184	167.731	123	149	147	150	174	193
Olfr558	0.439461	0.267174	1	65.3468	56.3759	74.3177	39	61	65	102	49	79
Olfr556	-0.391347	0.270007	1	78.3194	88.0056	68.6331	79	80	99	69	29	127
Olfr325	0.395481	0.272306	1	66.4092	58.3924	74.426	64	68	43	70	54	113
Olfr1052	0.474285	0.272722	1	31.6967	27.413	35.9805	22	25	33	32	29	53
Olfr938	0.811899	0.2728	1	9.55118	7.26582	11.8365	5	13	4	8	10	20
Olfr692	0.324507	0.274256	1	131.232	119.204	143.261	94	153	107	110	125	220
Olfr251	0.464937	0.274724	1	37.1156	32.9198	41.3114	24	25	46	37	41	50
Olfr1427	0.188331	0.275544	1	825.468	789.91	861.025	657	988	702	708	894	1068
Olfr247	0.618178	0.276707	1	15.4912	12.5028	18.4795	11	14	12	18	18	21
Olfr889	-0.599848	0.27749	1	20.1678	24.4724	15.8632	21	25	26	21	14	13
Olfr209	0.582019	0.278412	1	25.9284	22.2265	29.6303	11	42	14	16	31	47
Olfr572	0.456122	0.279307	1	33.78	29.0655	38.4946	30	28	28	32	38	50
Olfr1442	0.325794	0.280018	1	104.864	94.35	115.378	96	112	74	82	123	155
Olfr291	0.475555	0.280075	1	35.7	30.238	41.1619	39	25	26	34	28	71
Olfr1008	-1.73717	0.28015	1	0.160268	0.320535	0	0	1	0	0	0	0
Olfr850	-1.73717	0.28015	1	0.160268	0.320535	0	0	1	0	0	0	0
Olfr301	-0.430576	0.28147	1	38.0079	44.3477	31.6681	41	46	44	26	28	46
Olfr748	0.328734	0.282361	1	97.9304	89.0583	106.802	94	108	65	110	90	133
Olfr657	0.717347	0.282879	1	14.2801	11.6444	16.9157	21	6	8	13	14	27
Olfr1511	0.390906	0.283165	1	88.7953	79.2754	98.3152	89	107	44	74	93	143
Olfr1199	-0.617717	0.28331	1	16.8305	20.5702	13.0909	20	22	19	17	8	16
Olfr51	1.01784	0.284439	1	7.67813	5.18433	10.1719	1	7	7	15	10	5
Olfr670	0.646916	0.286838	1	17.3827	14.106	20.6595	9	21	12	20	14	32
Olfr1286	0.677958	0.287198	1	14.2131	11.5392	16.8869	10	19	6	15	15	23
Olfr808	0.45104	0.288929	1	41.9007	34.6208	49.1806	36	37	30	24	67	60
Olfr1158	1.61895	0.289869	1	2.38443	1.92321	2.84564	0	6	0	3	2	4
Olfr651	0.578592	0.290073	1	18.2805	15.1224	21.4385	14	11	19	15	20	33
Olfr204	0.65982	0.29091	1	31.4034	24.1434	38.6633	39	20	14	14	39	72
Olfr1111	0.61083	0.291815	1	21.4161	18.225	24.6071	12	11	29	19	30	26
Olfr1226	-0.247856	0.292214	1	324.882	358.222	291.542	392	372	303	317	220	377
Olfr1085	0.633739	0.292373	1	17.8252	13.8925	21.7578	11	16	14	22	10	39
Olfr629	0.339092	0.293929	1	73.1953	67.066	79.3247	57	46	91	53	72	128
Olfr1471	0.595469	0.296177	1	16.4277	13.6214	19.2341	21	11	9	21	18	20
Olfr701	0.30705	0.29677	1	90.6593	83.241	98.0776	96	68	82	99	89	116
Olfr519	1.6629	0.296836	1	0.135209	0	0.270418	0	0	0	0	0	1
Olfr805	-0.311214	0.299361	1	141.036	158.576	123.496	183	125	160	87	114	191
Olfr919	-0.65236	0.302616	1	12.7605	15.9191	9.60195	20	18	10	7	10	13
Olfr1046	0.478307	0.302661	1	35.6296	29.7034	41.5558	34	33	22	26	35	73
Olfr803	-0.679081	0.305015	1	10.5299	12.9812	8.0785	17	13	9	7	11	6
Olfr1143	0.534114	0.306374	1	25.4512	20.8354	30.0669	27	17	18	21	40	30
Olfr211	0.206784	0.309611	1	555.829	528.508	583.151	432	576	549	578	440	825
Olfr382	1.44644	0.312441	1	1.86543	1.4973	2.23356	0	0	4	2	2	3
Olfr967	0.931442	0.313508	1	3.83802	2.72476	4.95127	4	1	3	7	4	4
Olfr223	0.962571	0.319246	1	3.47495	2.29687	4.65303	3	3	1	8	3	3
Olfr617	-0.471867	0.320429	1	29.9411	35.2689	24.6133	34	20	48	13	18	50
Olfr1253	-0.366313	0.320743	1	51.9224	60.1732	43.6716	48	44	82	28	44	66
Olfr137	0.528715	0.320961	1	19.0944	16.0803	22.1086	21	14	13	22	19	28
Olfr65	0.278956	0.323484	1	200.326	183.165	217.488	155	204	182	183	153	364
Olfr796	0.292104	0.323622	1	143.304	133.804	152.805	90	157	146	152	142	179
Olfr485	0.647724	0.324702	1	10.1802	8.06759	12.2929	8	9	7	12	9	18
Olfr569	-0.389377	0.325243	1	40.1879	46.1647	34.2111	45	43	48	24	36	47
Olfr706	0.325237	0.325263	1	72.8253	65.4988	80.1519	80	59	56	89	49	117
Olfr1336	-0.402563	0.325381	1	66.7735	76.3899	57.1572	102	78	50	49	34	103
Olfr402	1.1614	0.326868	1	3.93615	2.56272	5.30958	7	1	0	10	0	7
Olfr487	-0.524057	0.327798	1	19.4235	23.1307	15.7163	27	30	13	13	21	13
Olfr1213	-0.682946	0.32931	1	23.6396	29.9305	17.3487	10	32	44	24	5	27
Olfr784	-0.477439	0.329625	1	24.8105	29.39	20.231	22	30	34	15	16	34
Olfr109	0.30864	0.329719	1	123.838	117.778	129.897	112	64	164	106	124	177
Olfr1317	-0.556323	0.330321	1	19.4363	23.5048	15.3679	28	29	14	21	9	18
Olfr152	0.654888	0.330324	1	12.3637	9.61559	15.1117	12	11	6	15	8	26
Olfr1012	-0.326775	0.333055	1	60.9911	69.7845	52.1976	69	53	82	50	46	67
Olfr103	0.432084	0.333209	1	37.1426	30.563	43.7223	29	29	32	23	29	93
Olfr221	0.419966	0.333469	1	34.6728	30.4536	38.8919	37	23	30	31	40	50
Olfr1037	0.377696	0.3335	1	44.7765	40.0218	49.5311	40	30	47	37	53	64
Olfr704	0.894946	0.333709	1	9.17778	7.91218	10.4434	1	5	16	14	8	10
Olfr147	0.346568	0.333874	1	50.1847	45.09	55.2793	50	51	34	50	58	62
Olfr913	-0.430345	0.334396	1	30.7121	36.3401	25.0842	25	30	50	21	17	43
Olfr1382	0.267968	0.334738	1	127.231	118.512	135.951	93	146	112	118	141	161
Olfr1325	-0.263423	0.337484	1	145.17	161.769	128.57	201	145	136	130	107	165
Olfr598	0.261039	0.337753	1	125.661	116.959	134.363	120	106	119	144	109	166
Olfr1283	-0.28956	0.3421	1	95.0229	107.737	82.3085	163	109	55	93	87	68
Olfr1238	-0.352623	0.34412	1	58.8313	66.9952	50.6674	84	55	60	36	57	64
Olfr1299	-0.369511	0.345386	1	40.2718	46.0075	34.5361	36	48	51	23	40	44
Olfr672	0.238896	0.345395	1	210.536	196.251	224.82	195	185	199	174	198	341
Olfr976	0.564211	0.345976	1	29.4509	25.164	33.7379	16	45	15	31	18	61
Olfr924	0.502324	0.347094	1	19.5025	16.9945	22.0105	12	13	24	21	16	33
Olfr983	-0.287178	0.350467	1	77.6403	86.9806	68.3	83	102	74	65	64	83
Olfr656	0.287672	0.351312	1	85.1594	78.1621	92.1567	85	83	65	77	86	126
Olfr370	0.247263	0.352003	1	244.344	231.526	257.162	160	302	223	224	221	366
Olfr1182	0.596577	0.352198	1	16.9843	14.4776	19.491	11	26	7	16	16	30
Olfr453	0.385531	0.353185	1	38.1936	33.9775	42.4097	36	42	24	39	37	57
Olfr1408	0.291601	0.353205	1	73.7771	68.2879	79.2663	66	56	78	68	77	102
Olfr952	-0.964838	0.353351	1	3.23809	4.1147	2.36148	3	4	5	0	2	6
Olfr1048	0.677062	0.353405	1	21.0398	16.9321	25.1476	31	9	11	9	29	42
Olfr1056	-0.534662	0.353552	1	17.9083	21.4224	14.3941	28	19	17	10	18	16
Olfr715	-0.23969	0.357709	1	178.556	197.377	159.734	199	167	214	157	121	227
Olfr1380	-0.277047	0.358011	1	117.246	131.381	103.112	109	176	107	83	94	148
Olfr444	1.15272	0.358819	1	2.59268	1.60179	3.58357	4	1	0	4	6	0
Olfr1443	-0.303719	0.359873	1	294.078	332.518	255.639	299	477	224	324	161	316
Olfr17	-0.207696	0.360206	1	343.046	374.743	311.348	272	415	413	226	267	501
Olfr1010	0.865621	0.360605	1	4.29197	2.93816	5.64578	2	6	1	6	9	1
Olfr399	0.561132	0.362576	1	17.3541	14.2157	20.4926	9	12	20	26	8	32
Olfr658	-0.487706	0.362668	1	29.4584	35.2559	23.6609	43	46	18	20	17	39
Olfr1451	0.667264	0.364203	1	8.31927	6.46558	10.173	5	7	7	14	8	9
Olfr263	-0.23953	0.364285	1	212.154	232.149	192.159	242	222	223	217	124	267
Olfr646	0.616702	0.36429	1	12.3112	10.422	14.2004	4	11	15	16	9	20
Olfr198	-0.511949	0.365838	1	16.5275	19.6126	13.4424	12	20	25	6	14	23
Olfr1495	0.458385	0.369879	1	24.6669	21.5898	27.7439	11	26	26	20	20	50
Olfr961	0.439764	0.370593	1	48.9435	40.4909	57.3961	58	38	26	33	37	120
Olfr15	0.159504	0.371198	1	871.595	844.35	898.841	710	890	886	867	741	1216
Olfr1233	-0.391828	0.371343	1	35.7151	41.3033	30.127	43	31	47	25	35	32
Olfr368	0.493238	0.372831	1	21.4017	19.1313	23.672	19	8	28	17	22	36
Olfr1154	-0.459896	0.372966	1	27.6722	32.2765	23.0678	24	30	40	29	10	35
Olfr1354	0.355511	0.374578	1	38.6744	34.4614	42.8874	37	32	33	38	48	45
Olfr1331	-0.603188	0.375034	1	10.9543	13.1437	8.76494	12	15	12	6	5	18
Olfr414	0.266878	0.376607	1	104.919	97.2981	112.54	83	112	93	105	86	166
Olfr119	-0.335555	0.37707	1	52.5432	59.9492	45.1373	68	42	66	32	45	65
Olfr1209	-0.382433	0.377383	1	31.9535	36.8628	27.0442	44	36	30	26	25	33
Olfr951	0.511817	0.378566	1	19.7616	16.0269	23.4963	19	17	12	11	30	32
Olfr1042	0.396048	0.378812	1	33.5783	29.1708	37.9858	30	33	24	27	31	64
Olfr633	0.260128	0.380001	1	96.7233	89.756	103.691	101	88	78	103	80	144
Olfr1198	-0.30442	0.381519	1	64.4844	71.598	57.3709	69	68	74	52	34	100
Olfr1045	0.269757	0.383188	1	74.1967	68.8755	79.518	55	77	71	68	85	92
Olfr1028	-0.365087	0.383656	1	34.666	39.6969	29.6351	40	43	35	32	25	35
Olfr1229	0.258024	0.384916	1	108.61	101.237	115.983	100	140	65	90	137	128
Olfr350	0.326558	0.388495	1	48.8018	44.403	53.2005	44	35	51	46	59	58
Olfr1294	0.254269	0.388959	1	92.5221	86.3381	98.706	99	77	80	92	84	134
Olfr699	0.58183	0.38896	1	12.7947	10.6834	14.9061	18	6	8	12	19	14
Olfr700	0.795858	0.389384	1	4.12419	3.31271	4.93566	1	7	2	4	6	5
Olfr1406	0.274561	0.389754	1	86.8905	79.6639	94.1171	65	103	69	61	90	148
Olfr654	0.314837	0.391192	1	47.8701	43.4395	52.3008	43	40	45	46	39	82
Olfr1129	0.506309	0.39136	1	17.2139	14.8511	19.5768	15	22	8	21	16	24
Olfr917	-1.10176	0.392464	1	2.23264	2.61785	1.84743	1	6	1	0	5	0
Olfr483	0.562752	0.394441	1	12.7056	11.4823	13.9289	24	6	5	17	11	15
Olfr287	-0.262222	0.395843	1	144.946	155.646	134.246	164	122	171	118	61	264
Olfr1223	-0.521777	0.397207	1	14.3259	16.7749	11.8769	22	14	14	13	15	7
Olfr92	-0.235446	0.399652	1	119.828	132.453	107.203	148	103	139	96	85	159
Olfr1062	1.13059	0.400463	1	3.08894	3.20535	2.97253	0	10	0	2	4	3
Olfr1240	0.226552	0.400984	1	202.687	195.106	210.268	140	178	249	200	188	268
Olfr1097	-0.335605	0.401987	1	39.3203	44.5018	34.1389	64	27	41	47	16	45
Olfr906	0.766221	0.404519	1	4.10712	2.99151	5.22273	4	3	2	6	2	9
Olfr1346	0.226322	0.40575	1	141.334	133.571	149.096	157	101	136	150	106	217
Olfr1259	0.261767	0.406061	1	71.8871	66.734	77.0402	69	61	67	69	62	113
Olfr389	-0.29345	0.406708	1	52.328	58.6671	45.9889	48	72	54	37	50	55
Olfr1308	0.413018	0.407082	1	25.634	21.903	29.3649	24	28	14	42	26	20
Olfr502	0.409631	0.407501	1	39.2814	33.6026	44.9602	29	56	17	17	54	71
Olfr222	-0.161718	0.407808	1	544.171	593.418	494.925	434	599	701	460	445	641
Olfr545	-0.431668	0.408468	1	22.4519	26.1762	18.7276	40	16	22	24	8	28
Olfr532	0.300419	0.409334	1	47.6485	43.5991	51.6978	41	46	42	44	48	70
Olfr640	0.269239	0.409723	1	125.084	117.189	132.98	74	134	135	130	86	210
Olfr1245	1.06229	0.410677	1	2.52246	2.24375	2.80118	0	7	0	2	5	1
Olfr555	1.41065	0.411682	1	0.982153	0.641071	1.32323	0	2	0	2	1	1
Olfr683	0.324634	0.413616	1	42.782	38.4692	47.0947	37	41	36	42	33	76
Olfr972	0.33329	0.415755	1	41.7359	37.3427	46.129	43	42	27	31	53	59
Olfr1416	0.307742	0.416302	1	75.9285	68.6638	83.1932	49	80	73	115	61	79
Olfr272	-0.328576	0.416603	1	40.5514	45.4151	35.6878	49	39	46	38	19	58
Olfr159	-1.21523	0.417257	1	1.17071	1.60245	0.73897	1	4	0	0	2	0
Olfr473	0.396749	0.417296	1	26.3793	23.718	29.0407	37	16	18	32	19	41
Olfr201	0.472253	0.417821	1	17.9693	14.6952	21.2435	10	16	17	12	12	47
Olfr507	-1.05542	0.420127	1	2.09257	3.20357	0.981569	8	2	0	1	1	1
Olfr307	-0.91755	0.420986	1	2.8886	3.68614	2.09106	5	3	3	0	2	5
Olfr205	0.293893	0.425437	1	46.0799	42.4285	49.7313	33	41	50	35	51	70
Olfr559	0.456271	0.427192	1	20.69	18.322	23.0579	30	12	13	18	26	27
Olfr943	0.349469	0.428452	1	42.7347	37.7695	47.7	49	35	29	29	43	81
Olfr1513	0.32587	0.428838	1	51.4352	48.1518	54.7185	29	43	67	64	45	60
Olfr129	0.311121	0.430064	1	43.2055	39.5331	46.8779	51	35	32	42	39	67
Olfr44	-0.308881	0.432344	1	39.4441	44.293	34.5951	45	43	43	28	37	42
Olfr126	-0.506552	0.432836	1	24.8934	28.0454	21.7414	41	22	21	7	37	21
Olfr33	0.248874	0.43317	1	90.6211	85.7079	95.5343	60	107	86	91	80	129
Olfr18	0.46997	0.434221	1	14.6783	13.3077	16.0488	10	7	21	15	12	24
Olfr267	-0.347031	0.434254	1	30.6885	34.9473	26.4298	29	31	42	17	28	38
Olfr411	0.306118	0.434318	1	42.4156	39.6515	45.1797	22	48	46	35	46	60
Olfr734	0.377221	0.436395	1	33.1118	30.1893	36.0344	36	15	37	42	36	31
Olfr117	-0.239491	0.437472	1	82.3067	91.2608	73.3527	97	71	100	80	66	80
Olfr11	0.23313	0.438565	1	81.0591	76.1366	85.9815	71	86	69	78	83	106
Olfr1134	0.358417	0.43934	1	28.3337	25.113	31.5545	23	25	26	22	27	52
Olfr97	0.275235	0.439459	1	57.9042	53.7587	62.0496	45	41	70	38	64	94
Olfr869	0.473289	0.439641	1	12.3632	10.526	14.2004	10	10	11	16	9	20
Olfr907	1.11964	0.440448	1	1.44399	1.12297	1.765	0	0	3	2	0	4
Olfr484	-0.667185	0.442847	1	10.0581	12.345	7.77116	5	16	15	9	1	16
Olfr286	0.277379	0.444015	1	53.8568	50.3277	57.386	43	72	36	53	58	66
Olfr1431	0.534615	0.444231	1	15.6213	13.0861	18.1565	19	16	5	17	10	32
Olfr1281	-0.247145	0.44449	1	87.4833	94.9941	79.9725	112	77	92	89	39	130
Olfr231	0.312468	0.445421	1	38.8307	34.7301	42.9313	38	26	38	42	21	77
Olfr996	1.02558	0.445637	1	2.77036	1.60223	3.93849	2	3	0	0	7	5
Olfr118	-0.358013	0.446728	1	26.2116	29.973	22.4502	31	31	27	23	19	28
Olfr807	0.470785	0.447571	1	24.0065	21.8065	26.2065	14	12	36	36	23	20
Olfr570	0.273602	0.449221	1	53.4548	49.4293	57.4804	40	43	61	37	65	77
Olfr141	0.422958	0.450082	1	16.2007	14.1044	18.297	16	14	12	21	14	22
Olfr57	0.298074	0.450085	1	51.6723	47.7735	55.5711	37	42	60	68	48	54
Olfr1440	0.291487	0.450351	1	43.7389	40.0712	47.4065	40	43	36	46	36	68
Olfr371	0.588735	0.451377	1	7.02013	5.66248	8.37778	8	5	4	5	10	11
Olfr870	-0.326049	0.45164	1	34.1271	39.218	29.0362	46	25	44	26	26	39
Olfr1420	-0.202105	0.452661	1	208.877	227.504	190.25	204	263	208	181	147	274
Olfr1509	-0.208641	0.455134	1	137.753	149.963	125.544	171	158	119	149	101	138
Olfr477	-0.174536	0.456024	1	282.265	306.765	257.765	265	294	341	244	240	317
Olfr1157	0.314723	0.457799	1	33.7942	30.8286	36.7598	34	26	31	37	36	40
Olfr298	0.466442	0.458377	1	14.4123	12.6631	16.1614	16	6	15	20	15	14
Olfr584	0.344244	0.459013	1	49.3501	42.3202	56.3799	46	23	54	19	45	123
Olfr910	0.278331	0.459269	1	55.5148	50.8609	60.1687	64	41	46	47	44	103
Olfr310	-0.714332	0.459309	1	5.47105	5.93209	5.01002	5	3	9	2	0	16
Olfr821	0.299229	0.459466	1	43.4975	39.9068	47.0882	44	49	27	38	44	66
Olfr168	-0.185763	0.460526	1	262.794	286.297	239.291	301	360	199	219	238	283
Olfr685	0.204515	0.460626	1	153.2	145.069	161.331	133	141	153	156	116	241
Olfr472	-0.212801	0.461267	1	251.694	271.994	231.395	283	303	225	270	138	326
Olfr513	-0.652082	0.46276	1	5.90732	6.94815	4.86649	2	8	10	1	2	14
Olfr1090	-0.49903	0.463003	1	11.1583	13.624	8.69266	19	6	15	6	7	15
Olfr606	0.24418	0.464524	1	63.677	59.3522	68.0018	82	46	49	89	41	83
Olfr1500	0.269223	0.464984	1	60.1622	56.2699	64.0545	42	53	69	77	48	74
Olfr782	0.394135	0.465994	1	20.1581	17.8426	22.4736	19	25	10	16	27	26
Olfr1302	0.416043	0.466997	1	17.1748	15.1722	19.1774	22	9	14	24	18	16
Olfr194	-0.710461	0.467834	1	9.45152	11.3779	7.52517	10	22	3	1	7	17
Olfr357	-0.230038	0.469298	1	70.2058	77.5861	62.8256	64	80	84	59	54	84
Olfr832	0.644155	0.469832	1	8.08463	6.19575	9.9735	9	8	2	5	7	21
Olfr53	0.223816	0.470175	1	85.3035	80.6819	89.9252	63	100	76	73	80	131
Olfr645	0.416771	0.470515	1	25.6762	22.8177	28.5347	23	12	31	32	33	20
Olfr1338	0.432432	0.470958	1	16.4746	14.639	18.3102	11	23	10	16	15	27
Olfr1350	0.26046	0.471975	1	87.6637	80.407	94.9203	70	112	59	61	79	166
Olfr1364	0.173286	0.472045	1	222.27	213.668	230.871	189	243	201	210	225	281
Olfr446	0.243436	0.472387	1	115.439	110.194	120.685	69	109	142	141	85	152
Olfr1344	0.293161	0.47341	1	48.5027	44.7692	52.2363	61	32	40	36	51	78
Olfr539	0.214047	0.473605	1	126.164	118.551	133.777	130	129	95	100	132	188
Olfr224	0.188214	0.473751	1	180.285	172.43	188.139	163	145	197	185	131	283
Olfr1272	0.461152	0.474532	1	14.5215	12.3974	16.6456	11	9	16	23	15	12
Olfr192	-0.313325	0.475195	1	31.7299	35.3113	28.1485	36	52	19	30	36	17
Olfr123	-0.211357	0.476948	1	90.2362	98.6241	81.8483	108	104	82	85	69	101
Olfr1208	0.198939	0.478622	1	123.823	118.397	129.249	86	183	86	111	163	115
Olfr619	0.386442	0.478735	1	17.6681	15.8175	19.5188	13	13	20	15	17	30
Olfr313	-0.386309	0.478989	1	29.7046	32.4266	26.9826	45	27	25	26	8	56
Olfr282	0.396942	0.479351	1	18.951	17.1488	20.7531	14	29	9	15	24	25
Olfr767	0.380685	0.479446	1	18.7338	16.9361	20.5316	23	10	17	22	14	29
Olfr1234	0.346005	0.479942	1	24.1259	22.0157	26.2361	21	15	28	23	19	42
Olfr1024	-1.61171	0.483051	1	1.36679	1.92232	0.811254	4	2	0	0	0	3
Olfr622	0.264339	0.483227	1	51.0543	47.0154	55.0932	50	50	40	59	36	80
Olfr98	1.68236	0.485278	1	1.14496	0.640625	1.64929	2	0	0	0	3	2
Olfr955	0.515336	0.488152	1	10.5131	9.56024	11.466	19	5	5	9	11	16
Olfr243	0.488837	0.488405	1	10.8397	10.2544	11.4249	22	3	6	15	9	11
Olfr1023	-0.549278	0.491111	1	6.73517	8.3901	5.08023	9	2	13	4	2	11
Olfr902	-0.525481	0.491461	1	8.26151	10.1484	6.37461	15	12	4	8	4	8
Olfr1333	-0.287165	0.492863	1	37.6072	42.5901	32.6242	32	39	53	36	25	41
Olfr1039	0.371769	0.493076	1	20.7607	18.5359	22.9856	26	19	11	18	28	24
Olfr113	-0.881839	0.495967	1	4.38786	4.64819	4.12752	3	8	3	1	0	14
Olfr1026	0.314811	0.497086	1	29.1857	27.0871	31.2844	36	17	27	32	28	37
Olfr78	0.251801	0.498655	1	63.9032	59.0339	68.7724	62	72	43	51	57	112
Olfr608	0.39056	0.50218	1	21.0419	18.5377	23.5462	18	27	11	17	18	41
Olfr1467	0.285301	0.502266	1	34.1438	31.3599	36.9278	34	37	23	30	40	44
Olfr787	-0.268504	0.506468	1	37.3053	41.2522	33.3585	31	44	46	20	33	53
Olfr60	0.191944	0.506782	1	195.501	184.536	206.467	190	206	154	169	161	330
Olfr769	0.310898	0.508668	1	31.1393	28.7919	33.4867	41	29	17	28	34	42
Olfr1330	0.189992	0.509236	1	130.358	124.057	136.659	116	159	96	102	146	177
Olfr1252	0.239047	0.509434	1	54.3027	51.0269	57.5784	43	59	49	61	46	73
Olfr1449	-0.544857	0.509454	1	5.95238	7.05153	4.85324	11	4	6	6	1	9
Olfr235	-0.293477	0.511851	1	41.2611	46.1022	36.4199	64	39	35	24	31	62
Olfr332	-0.154744	0.512411	1	278.031	301.425	254.637	278	248	355	258	212	326
Olfr1206	-0.368308	0.515236	1	29.061	32.805	25.317	27	45	26	34	10	37
Olfr432	-0.329839	0.515924	1	28.6795	32.2181	25.1409	25	44	27	18	17	47
Olfr811	0.260461	0.516524	1	37.1077	34.6246	39.5909	29	37	36	36	38	49
Olfr638	0.390515	0.517233	1	15.7576	14.3756	17.1396	6	19	17	14	21	17
Olfr890	0.510967	0.517493	1	8.13412	6.51937	9.74887	5	6	8	15	3	13
Olfr1447	0.231153	0.519379	1	50.9553	47.61	54.3006	37	52	51	36	50	87
Olfr1314	0.61311	0.519862	1	3.76534	2.99128	4.5394	5	2	2	4	2	9
Olfr1080	0.373467	0.522255	1	22.461	19.5508	25.3713	28	19	12	23	13	47
Olfr395	0.589388	0.523633	1	3.8882	3.15354	4.62285	1	3	5	1	5	9
Olfr456	-1.66279	0.526173	1	0.852374	1.33526	0.369485	3	0	1	0	1	0
Olfr360	0.18643	0.526184	1	118.432	112.894	123.97	104	135	97	102	108	182
Olfr1033	0.343535	0.526241	1	21.0918	18.9644	23.2191	24	20	13	20	18	36
Olfr1126	-0.468996	0.526426	1	7.05372	8.38835	5.7191	7	11	7	5	5	8
Olfr340	-1.23645	0.527858	1	0.825814	1.28214	0.369485	0	4	0	0	1	0
Olfr58	-0.501102	0.528163	1	6.80566	7.90887	5.70245	6	7	10	3	9	5
Olfr1220	0.294598	0.528281	1	27.1585	25.0083	29.3087	20	23	30	24	22	48
Olfr1179	-0.473627	0.528418	1	7.88352	9.56377	6.20326	13	4	11	8	5	6
Olfr49	0.194959	0.529292	1	90.0256	86.7795	93.2716	59	102	94	81	78	136
Olfr666	0.24577	0.529963	1	99.138	92.2046	106.071	98	129	52	69	93	178
Olfr76	0.274348	0.532299	1	37.171	32.6991	41.6429	29	38	30	17	56	56
Olfr918	0.395126	0.533963	1	13.7055	11.8073	15.6037	14	10	11	8	18	23
Olfr68	0.370971	0.534402	1	19.4823	16.2421	22.7224	19	13	16	11	14	51
Olfr59	0.164245	0.534679	1	168.387	162.521	174.252	193	146	144	179	148	216
Olfr512	0.430081	0.536145	1	13.8155	12.498	15.133	23	9	6	10	20	16
Olfr91	-0.280711	0.53664	1	34.5593	37.9326	31.186	41	40	32	21	24	56
Olfr895	0.287532	0.536916	1	31.1658	28.2095	34.1222	29	31	24	45	20	42
Olfr635	0.366829	0.537768	1	25.3337	21.7939	28.8735	31	23	12	28	12	55
Olfr1410	-0.276752	0.538203	1	38.9975	42.6362	35.3589	37	54	36	53	24	31
Olfr843	-0.297367	0.539877	1	32.4014	35.74	29.0627	43	37	27	16	28	49
Olfr275	0.411889	0.540164	1	9.1892	8.12093	10.2575	10	6	8	10	9	13
Olfr64	-0.253497	0.541561	1	52.3527	56.0964	48.6091	67	52	48	43	23	94
Olfr804	-0.330613	0.541834	1	20.3121	23.0251	17.5991	28	24	17	15	14	27
Olfr143	0.361061	0.542833	1	23.0273	22.4383	23.6164	36	6	24	19	20	36
Olfr871	0.4352	0.54382	1	8.50935	7.37229	9.64641	10	6	6	8	7	16
Olfr763	-0.297509	0.544104	1	25.8795	29.0674	22.6915	31	20	34	15	19	39
Olfr1076	-1.23642	0.545119	1	2.04294	1.92254	2.16334	3	3	0	0	0	8
Olfr1170	0.272436	0.546659	1	35.5003	32.3749	38.6257	36	37	24	27	32	65
Olfr1535	0.206177	0.548656	1	73.2585	71.382	75.1351	43	119	52	50	81	104
Olfr132	0.141284	0.548921	1	230.053	224.15	235.956	217	194	247	212	193	341
Olfr294	-0.911441	0.550007	1	0.665212	0.960938	0.369485	3	0	0	0	1	0
Olfr266	-0.516697	0.550583	1	5.24408	6.30708	4.18108	2	6	10	1	6	6
Olfr495	0.46214	0.550609	1	9.0134	7.90976	10.117	2	11	10	6	5	23
Olfr149	-0.554398	0.552037	1	9.59986	11.4852	7.71449	11	19	5	12	1	12
Olfr741	-0.190727	0.55215	1	409.745	429.083	390.407	391	524	363	308	209	769
Olfr1247	-0.18318	0.553452	1	83.8951	90.9288	76.8614	109	86	76	66	76	97
Olfr1510	0.232249	0.554429	1	45.3071	44.7882	45.8261	25	33	70	39	36	71
Olfr412	0.413988	0.554743	1	14.7898	14.2709	15.3088	3	17	21	16	12	20
Olfr338	-0.468812	0.55593	1	6.81326	8.33256	5.29397	16	3	6	7	2	8
Olfr8	0.279371	0.557863	1	33.8834	31.8908	35.876	36	46	15	27	37	48
Olfr1340	0.140258	0.558342	1	269.482	264.553	274.412	176	340	265	210	296	345
Olfr816	-0.233688	0.559638	1	41.2375	45.2042	37.2708	40	45	48	40	39	34
Olfr894	1.01985	0.560129	1	2.50205	1.81783	3.18627	0	1	4	5	4	0
Olfr1446	0.244492	0.560284	1	38.7451	35.8485	41.6416	39	39	29	31	35	67
Olfr479	0.198464	0.56154	1	59.0321	55.941	62.1233	50	65	51	47	61	87
Olfr67	0.183918	0.562891	1	108.46	101.189	115.732	117	96	88	158	61	145
Olfr661	0.232926	0.56552	1	47.5425	46.214	48.8709	65	22	49	41	38	77
Olfr611	0.261588	0.566317	1	30.6684	28.8007	32.5361	31	18	35	23	28	53
Olfr250	0.185426	0.568079	1	73.5088	69.5648	77.4529	70	70	66	61	61	126
Olfr470	-0.443843	0.568373	1	7.62434	9.18792	6.06076	10	14	4	6	5	8
Olfr199	0.390538	0.568831	1	10.627	9.6167	11.6374	7	16	6	9	10	18
Olfr323	-0.26199	0.569	1	31.2788	34.565	27.9925	45	29	29	23	34	28
Olfr1480	0.376781	0.569044	1	12.7338	11.3294	14.1382	6	13	14	14	18	10
Olfr90	0.194033	0.569427	1	72.5878	67.7472	77.4284	69	70	62	46	77	123
Olfr1477	-0.249712	0.570186	1	38.9856	43.3226	34.6487	65	34	31	28	43	34
Olfr1339	0.190044	0.572398	1	82.3365	76.4591	88.214	72	79	75	63	59	166
Olfr679	0.2773	0.572706	1	35.7495	32.5851	38.9138	48	28	22	28	26	73
Olfr1193	0.177991	0.573172	1	140.573	132.246	148.9	119	129	141	171	78	228
Olfr401	0.355723	0.575657	1	11.0881	9.93899	12.2372	9	8	12	14	7	18
Olfr937	0.328239	0.576026	1	24.8437	21.3665	28.321	28	27	10	52	11	24
Olfr156	0.201699	0.576777	1	49.8203	46.3768	53.2639	39	59	40	34	71	57
Olfr297	0.289382	0.577338	1	21.1315	19.2898	22.9731	12	26	19	12	24	37
Olfr642	-0.182483	0.577869	1	201.113	222.388	179.838	122	176	339	188	86	310
Olfr1271	0.161882	0.578303	1	115.707	113.397	118.017	79	109	142	109	92	173
Olfr1423	0.162164	0.579027	1	89.1778	85.9127	92.443	87	90	78	90	85	112
Olfr1396	-0.14716	0.58012	1	179.441	191.808	167.075	207	179	182	163	128	237
Olfr829	0.453657	0.580538	1	5.0866	4.32721	5.84599	5	5	3	4	7	7
Olfr599	0.160107	0.580546	1	145.961	138.656	153.265	140	114	153	157	83	255
Olfr366	0.275213	0.581222	1	23.3611	21.48	25.2423	21	18	24	26	15	40
Olfr429	-0.207615	0.581959	1	51.7624	56.6801	46.8446	73	56	41	38	47	61
Olfr39	-0.333229	0.582496	1	12.959	14.9059	11.012	20	9	15	13	9	12
Olfr1341	-0.153277	0.583744	1	270.23	291.32	249.14	219	342	298	289	197	287
Olfr615	0.146078	0.583921	1	173.384	167.295	179.473	146	181	167	133	171	262
Olfr659	0.323127	0.584355	1	19.368	17.3077	21.4283	25	15	12	17	13	40
Olfr960	-0.468094	0.585069	1	8.60735	10.099	7.11565	5	16	9	6	2	16
Olfr1151	-0.566478	0.586535	1	2.54006	3.04574	2.03439	2	4	3	3	2	1
Olfr1312	0.224392	0.588246	1	63.8072	62.4394	65.1751	90	78	23	50	76	74
Olfr855	0.251767	0.589505	1	39.3012	36.38	42.2225	38	51	21	26	39	70
Olfr862	0.630626	0.591621	1	2.71848	2.13837	3.29858	0	2	4	0	6	4
Olfr618	0.338625	0.591676	1	13.7901	12.8247	14.7555	15	4	18	10	8	31
Olfr1137	0.361723	0.59264	1	14.3545	13.0341	15.6749	21	8	10	9	18	22
Olfr1002	0.319825	0.593234	1	18.1536	16.5079	19.7993	23	11	15	13	24	24
Olfr283	0.329408	0.593633	1	17.4403	16.2364	18.6443	25	21	4	14	28	13
Olfr312	0.629336	0.593635	1	5.0026	5.9354	4.06981	0	1	15	5	2	6
Olfr1123	-0.215328	0.595944	1	40.9544	44.4002	37.5086	47	39	45	25	44	47
Olfr1457	0.36173	0.596777	1	18.5998	17.8477	19.3519	6	31	16	21	11	30
Olfr535	-0.164708	0.596804	1	106.942	114.452	99.4318	102	115	120	120	63	130
Olfr1047	0.293302	0.598329	1	22.7969	21.155	24.4388	31	14	18	16	25	36
Olfr459	0.287804	0.601598	1	17.6127	16.2454	18.98	14	11	22	13	13	36
Olfr430	0.145062	0.601846	1	177.182	174.464	179.901	111	229	175	139	171	256
Olfr134	0.300031	0.602372	1	14.8075	13.6262	15.9888	9	16	15	11	17	22
Olfr1043	0.272725	0.602875	1	28.2595	24.8458	31.6731	25	21	27	52	23	20
Olfr127	-0.194276	0.603346	1	54.7687	58.6086	50.9287	69	52	53	60	26	77
Olfr135	0.531399	0.604766	1	4.05773	3.84751	4.26794	5	0	6	5	4	4
Olfr1404	-0.148067	0.605446	1	104.68	112.364	96.9956	99	129	105	89	88	126
Olfr169	0.124211	0.605534	1	361.968	353.275	370.661	323	408	318	380	280	508
Olfr1349	0.120728	0.605654	1	260.681	256.114	265.249	226	224	299	223	216	404
Olfr575	0.272617	0.605787	1	22.2272	20.0369	24.4175	19	19	21	21	13	46
Olfr794	-0.200293	0.606335	1	47.0232	50.2794	43.767	48	47	53	34	27	82
Olfr433	-0.150123	0.606706	1	99.6718	106.529	92.8151	114	125	80	108	84	92
Olfr508	0.284581	0.607183	1	23.4588	20.8376	26.0801	17	27	18	16	17	53
Olfr872	-0.417472	0.607381	1	10.0691	11.5423	8.59596	6	16	12	14	3	10
Olfr958	-0.164418	0.60752	1	66.9648	72.4575	61.4722	64	64	84	50	55	89
Olfr324	-0.246659	0.608494	1	26.4362	29.8077	23.0647	49	16	24	32	16	23
Olfr1000	-0.415409	0.609104	1	8.00197	9.45798	6.54596	5	14	9	8	3	10
Olfr823	-0.409935	0.610284	1	9.69255	11.5448	7.84034	5	10	18	12	5	7
Olfr427	-0.758345	0.610468	1	1.57284	2.19193	0.953749	1	0	5	2	0	1
Olfr592	-0.173631	0.612262	1	87.6999	93.5531	81.8467	91	104	83	89	47	126
Olfr520	0.37772	0.613766	1	7.38128	6.41157	8.351	6	7	6	5	7	15
Olfr668	0.182579	0.615517	1	53.7942	50.6003	56.9881	46	50	53	34	54	94
Olfr695	0.142121	0.61687	1	164.749	158.689	170.809	130	197	144	115	162	265
Olfr1311	0.264672	0.619877	1	20.6603	20.0345	21.2861	30	8	21	25	14	28
Olfr691	0.15428	0.620005	1	92.3928	88.693	96.0925	83	98	82	82	73	152
Olfr1362	0.153068	0.620895	1	160.411	158.238	162.584	87	172	201	135	111	279
Olfr887	0.226784	0.621158	1	36.6382	35.6463	37.6301	20	34	49	42	33	41
Olfr1115	0.187162	0.621454	1	48.728	45.9488	51.5072	48	44	44	47	33	86
Olfr1095	-0.405143	0.622279	1	6.43186	7.42961	5.43411	4	4	13	1	5	12
Olfr605	-0.265921	0.622746	1	23.1454	26.9878	19.303	9	39	31	14	21	25
Olfr1217	-0.150997	0.623324	1	156.457	167.693	145.222	223	145	133	127	108	229
Olfr905	0.393933	0.624497	1	5.75335	5.07542	6.43129	7	3	5	5	4	12
Olfr1188	0.691087	0.625422	1	2.41223	1.76404	3.06042	0	2	3	5	0	5
Olfr215	-0.236578	0.625605	1	25.9399	28.8018	23.0779	26	23	35	27	17	28
Olfr914	-0.325763	0.626385	1	9.55977	10.8975	8.22204	13	14	6	8	9	8
Olfr969	0.177294	0.627406	1	47.2791	45.2518	49.3065	48	50	37	47	49	56
Olfr877	-0.205292	0.629364	1	33.015	35.6347	30.3953	33	49	25	27	39	25
Olfr847	0.214202	0.631224	1	30.5575	28.9048	32.2103	27	34	25	35	27	38
Olfr339	-0.171882	0.631832	1	49.942	54.0233	45.8607	35	67	57	29	49	66
Olfr66	-0.262157	0.632061	1	16.963	18.8597	15.0662	21	18	17	15	13	19
Olfr1328	-0.135121	0.633286	1	116.135	123.956	108.315	134	108	124	90	106	142
Olfr1065	0.184347	0.633991	1	52.0353	51.1354	52.9353	29	78	45	41	49	77
Olfr27	0.258713	0.634379	1	23.7383	21.0501	26.4264	19	28	16	10	33	40
Olfr16	0.132323	0.634548	1	146.848	142.019	151.678	130	152	138	111	141	228
Olfr1472	-0.477444	0.63789	1	3.88675	4.70087	3.07263	8	2	4	1	3	6
Olfr1184	-0.185335	0.640315	1	40.669	43.7584	37.5796	50	34	45	39	21	61
Olfr1301	0.137739	0.646092	1	99.6185	97.3946	101.842	93	128	71	91	100	125
Olfr492	1.20511	0.646914	1	2.5958	1.92188	3.26973	6	0	0	2	7	0
Olfr675	0.379551	0.64837	1	10.3612	9.67135	11.051	13	2	13	9	15	9
Olfr380	0.171339	0.648381	1	44.5042	43.0667	45.9418	46	30	50	41	33	73
Olfr703	-0.252684	0.648407	1	27.1674	30.6207	23.7141	31	12	45	10	22	45
Olfr420	0.15428	0.648777	1	60.0725	57.809	62.336	66	49	56	74	41	81
Olfr723	0.145077	0.648861	1	69.8306	68.0192	71.642	55	79	67	67	69	86
Olfr551	0.382799	0.649863	1	6.19795	5.66534	6.73056	5	1	10	3	3	17
Olfr1501	0.147505	0.649949	1	83.4927	79.8227	87.1627	86	72	78	57	80	141
Olfr1101	0.175132	0.650207	1	40.6165	38.8975	42.3354	36	41	38	41	43	46
Olfr729	-0.155121	0.650546	1	57.4461	61.827	53.0652	50	53	77	37	45	88
Olfr1136	0.51013	0.650986	1	2.64272	2.29731	2.98813	1	5	1	5	2	2
Olfr1287	-0.557191	0.652422	1	1.43148	1.71003	1.15292	1	2	2	1	0	3
Olfr981	0.293953	0.653037	1	12.7156	12.1856	13.2456	6	11	18	15	11	15
Olfr171	-0.164774	0.653767	1	112.09	120.412	103.768	136	151	76	98	68	167
Olfr125	0.160503	0.653786	1	55.9185	53.9071	57.93	54	64	43	50	52	80
Olfr586	0.184803	0.654807	1	36.7514	35.589	37.9138	26	36	42	37	34	47
Olfr620	0.352185	0.656728	1	9.11059	7.906	10.3152	9	11	4	6	7	21
Olfr1351	0.444653	0.658114	1	7.56396	6.46205	8.66588	11	8	1	6	4	19
Olfr1121	-0.346163	0.658771	1	7.10792	8.22631	5.98952	10	11	4	5	5	9
Olfr1018	-0.100632	0.660334	1	340.896	357.937	323.856	303	411	345	238	300	487
Olfr284	0.266386	0.660686	1	13.5724	12.2319	14.9129	20	10	7	26	9	10
Olfr195	0.221331	0.663575	1	29.5875	27.7284	31.4466	25	37	21	33	18	50
Olfr623	-0.288958	0.665779	1	12.2854	14.27	10.3009	7	13	21	12	8	12
Olfr1368	0.123115	0.666345	1	116.115	113.108	119.122	102	140	95	89	123	160
Olfr1100	-0.196812	0.666517	1	28.7408	30.828	26.6537	27	40	25	18	35	28
Olfr381	-0.253965	0.667062	1	17.5129	18.3282	16.6976	12	23	19	4	21	28
Olfr577	-0.15783	0.667486	1	86.7774	93.374	80.1808	131	95	56	87	48	121
Olfr589	0.640812	0.668344	1	0.92389	0.69486	1.15292	0	1	1	1	0	3
Olfr733	0.121047	0.6691	1	118.392	115.505	121.28	117	143	86	138	115	117
Olfr868	0.191925	0.66968	1	38.2938	37.5543	39.0334	59	22	31	34	42	44
Olfr73	0.168867	0.670838	1	45.9913	43.9209	48.0617	35	53	42	39	34	82
Olfr344	-0.657737	0.67169	1	0.455522	0.640625	0.270418	2	0	0	0	0	1
Olfr1140	-0.167534	0.671752	1	39.912	43.0612	36.7629	51	39	38	34	30	52
Olfr146	0.179318	0.671903	1	34.9868	33.7112	36.2624	44	25	31	39	35	37
Olfr1249	-0.295606	0.673104	1	13.8397	16.6674	11.012	12	33	6	13	9	12
Olfr172	-0.533652	0.674963	1	2.58821	2.67142	2.50501	2	4	2	1	0	8
Olfr828	0.474407	0.675184	1	5.54251	3.84795	7.23707	3	2	6	0	13	9
Olfr1141	0.70403	0.677211	1	0.829485	0.748649	0.910321	0	0	2	0	1	2
Olfr1381	0.145913	0.680416	1	88.7763	86.7209	90.8317	61	115	81	110	68	104
Olfr632	0.183288	0.680435	1	30.1033	29.2343	30.9723	16	25	43	18	24	59
Olfr1030	0.139652	0.681329	1	58.3204	57.1773	59.4635	44	55	68	48	58	80
Olfr693	-0.111415	0.683109	1	141.047	149.292	132.803	143	129	166	102	118	201
Olfr649	-0.207996	0.683504	1	21.9305	23.8838	19.9772	27	16	27	17	12	36
Olfr771	0.224264	0.684455	1	22.848	21.5276	24.1684	29	23	13	16	25	35
Olfr1152	0.307157	0.684496	1	10.3692	9.56046	11.1779	18	6	5	8	17	8
Olfr1414	-0.118637	0.685376	1	104.363	110.908	97.817	135	106	90	87	95	122
Olfr1162	-0.203479	0.685579	1	35.2034	35.8507	34.5562	39	32	35	55	9	46
Olfr566	0.194273	0.687481	1	27.1728	25.4331	28.9124	25	24	26	24	18	52
Olfr1507	-0.0960838	0.688824	1	422.456	433.593	411.319	568	332	388	540	185	586
Olfr665	0.111414	0.689	1	159.08	154.894	163.266	148	159	151	126	138	256
Olfr1122	0.187299	0.689409	1	30.6925	30.0764	31.3085	50	10	29	37	11	54
Olfr653	0.126504	0.689883	1	86.1687	85.7321	86.6053	114	108	39	96	90	76
Olfr352	-0.457699	0.690557	1	6.67213	5.77094	7.57332	4	7	6	19	0	4
Olfr571	0.115709	0.691483	1	186.258	182.266	190.251	146	188	201	203	123	279
Olfr543	-0.211534	0.695157	1	19.5381	21.5349	17.5414	16	22	25	19	16	19
Olfr131	0.0886222	0.695767	1	327.634	323.136	332.131	300	379	282	264	343	426
Olfr101	-0.0928428	0.696072	1	227.074	239.242	214.905	183	212	301	144	185	360
Olfr102	0.195909	0.696239	1	22.7682	21.428	24.1083	13	27	23	12	30	33
Olfr676	0.182264	0.698764	1	31.4365	29.8663	33.0067	37	20	31	21	26	60
Olfr1322	-0.152532	0.699171	1	48.3772	51.5624	45.192	44	55	53	54	27	62
Olfr1366	0.166477	0.699179	1	40.208	37.8786	42.5374	42	40	31	27	36	74
Olfr1138	0.338329	0.699555	1	5.23791	4.70109	5.77474	7	3	4	3	7	8
Olfr716	-0.109765	0.700216	1	130.738	138.393	123.082	114	145	148	109	94	189
Olfr1437	-0.152024	0.700227	1	43.4235	46.4296	40.4175	53	37	47	29	35	65
Olfr1474	0.126214	0.702559	1	63.5979	62.1934	65.0025	56	68	60	64	56	83
Olfr713	-0.167308	0.702776	1	33.3641	37.0321	29.6962	38	18	51	35	18	41
Olfr714	0.1792	0.704735	1	29.14	28.2154	30.0646	22	24	36	36	21	37
Olfr1079	-0.140422	0.705261	1	48.5621	51.612	45.5123	53	52	48	37	37	71
Olfr314	0.124569	0.705693	1	64.3322	62.7308	65.9336	58	56	70	62	45	104
Olfr1118	0.288811	0.707839	1	8.90916	8.75825	9.06007	17	8	2	8	12	7
Olfr1394	-0.179928	0.708725	1	33.3911	35.5767	31.2056	42	48	18	51	19	25
Olfr851	0.146942	0.709594	1	57.0234	54.0239	60.0229	42	53	63	61	27	108
Olfr1320	-0.183065	0.709818	1	28.2071	30.6633	25.7509	42	28	22	21	21	40
Olfr655	-0.117352	0.710273	1	89.7415	94.8952	84.5878	83	101	96	87	57	125
Olfr774	0.497463	0.710477	1	1.81234	1.33549	2.28919	2	1	1	0	4	3
Olfr1241	-0.129104	0.711277	1	60.2596	63.6889	56.8304	64	60	64	62	35	84
Olfr798	0.148933	0.711842	1	36.8731	35.804	37.9423	27	31	46	25	32	65
Olfr96	0.100324	0.713262	1	174.001	170.49	177.512	172	179	155	139	166	254
Olfr1215	-0.193379	0.716534	1	25.5138	29.2888	21.7388	23	10	50	12	17	42
Olfr328	0.103302	0.719903	1	154.312	150.302	158.322	144	144	155	155	100	253
Olfr777	0.102014	0.722292	1	98.6711	97.2535	100.089	81	87	116	78	78	165
Olfr437	-0.157341	0.723117	1	30.7289	33.1292	28.3285	30	29	38	32	20	37
Olfr509	0.096388	0.724844	1	144.783	142.071	147.494	136	145	139	112	139	214
Olfr982	0.136577	0.725516	1	40.7103	40.1865	41.2342	35	25	56	34	26	74
Olfr1098	-0.271193	0.726295	1	15.3683	15.9795	14.7571	10	13	23	29	8	7
Olfr1280	-0.12284	0.727378	1	71.6715	75.1148	68.2282	90	72	62	67	40	113
Olfr746	-0.241062	0.728024	1	10.0283	10.7397	9.31696	7	16	9	3	10	17
Olfr835	-0.168103	0.730449	1	27.2418	29.1664	25.3172	40	30	18	21	33	22
Olfr686	0.17446	0.73138	1	25.5208	23.5624	27.4792	21	28	21	12	34	40
Olfr1489	0.207272	0.73196	1	13.4842	12.9838	13.9846	15	8	15	15	13	15
Olfr1163	0.256563	0.732236	1	7.63058	7.21047	8.05069	12	7	3	8	10	6
Olfr1195	0.161406	0.733142	1	39.7149	37.941	41.4888	33	27	50	62	33	30
Olfr866	-0.343461	0.733734	1	6.51246	6.89083	6.13408	8	10	3	5	1	15
Olfr726	-0.0804541	0.735495	1	314.826	328.059	301.593	325	325	320	297	213	449
Olfr150	-0.099558	0.735788	1	91.5621	97.4089	85.7152	98	74	113	74	75	121
Olfr1389	0.0870692	0.737135	1	223.258	229.102	217.414	180	153	327	193	186	306
Olfr1329	-0.228791	0.738199	1	8.65574	9.4033	7.90819	9	11	8	6	10	8
Olfr25	-0.18438	0.738565	1	19.2867	21.1012	17.4722	31	15	17	16	12	28
Olfr518	0.0919971	0.739171	1	132.988	132.893	133.082	120	109	159	135	108	174
Olfr154	0.25289	0.739879	1	6.78581	6.30332	7.26829	9	6	4	6	9	7
Olfr516	-0.108105	0.740089	1	68.5517	72.0268	65.0765	66	70	76	52	49	108
Olfr1275	-0.217635	0.74037	1	23.3126	27.6295	18.9956	6	44	31	16	11	35
Olfr77	0.170871	0.740373	1	25.5413	24.0943	26.9883	28	25	19	18	22	47
Olfr822	-0.255734	0.741528	1	7.63012	8.01667	7.24358	5	6	12	4	2	19
Olfr1201	-0.28351	0.74198	1	6.78735	7.79995	5.77474	12	3	8	3	7	8
Olfr799	0.145763	0.742409	1	41.2707	37.7236	44.8177	33	38	40	15	54	73
Olfr1166	-0.197414	0.743303	1	14.7391	16.1301	13.3481	29	12	8	22	7	12
Olfr1508	-0.103522	0.743409	1	90.0657	95.4606	84.6708	122	107	59	105	64	93
Olfr498	0.317502	0.743611	1	7.31054	6.83771	7.78338	5	14	2	5	4	17
Olfr361	-0.120977	0.7459	1	52.7349	56.1001	49.3697	50	69	48	48	38	70
Olfr299	-0.138839	0.746138	1	34.6664	36.8632	32.4695	42	38	30	38	22	42
Olfr12	0.0907371	0.746206	1	227.521	227.303	227.739	162	295	216	210	177	335
Olfr1263	-0.0872412	0.746256	1	193.402	203.159	183.646	153	224	220	147	143	298
Olfr160	0.173107	0.747208	1	19.267	18.9717	19.5622	11	19	25	17	16	29
Olfr262	-0.279678	0.74754	1	5.06099	5.82518	4.2968	2	8	7	3	3	8
Olfr354	-0.167953	0.747693	1	21.7297	23.8871	19.5723	12	31	27	15	23	22
Olfr944	0.140253	0.749175	1	36.5415	36.0639	37.0191	28	53	27	40	31	44
Olfr786	0.130933	0.749834	1	43.3192	43.4897	43.1487	59	23	46	39	39	57
Olfr46	0.0967424	0.750123	1	102.722	100.815	104.628	115	98	87	92	81	160
Olfr523	0.0761404	0.750286	1	406.754	405.592	407.917	339	491	373	437	323	515
Olfr385	0.443572	0.75166	1	3.39954	2.61696	4.18212	5	2	1	0	4	10
Olfr749	0.076833	0.751948	1	260.394	257.228	263.559	225	253	278	208	207	429
Olfr1466	0.161407	0.752323	1	29.2247	27.6206	30.8288	36	21	25	17	26	57
Olfr788	0.0806245	0.753356	1	210.356	207.415	213.296	209	200	204	182	166	332
Olfr476	0.125909	0.753783	1	44.6067	43.3846	45.8288	38	53	38	57	34	51
Olfr1257	-0.0876231	0.754003	1	171.571	178.343	164.798	175	197	158	113	171	233
Olfr1200	0.11225	0.756803	1	81.3312	79.6506	83.0118	95	94	51	63	72	129
Olfr538	0.131967	0.756804	1	35.3745	35.0544	35.6945	21	44	38	29	31	53
Olfr1086	-0.220673	0.758663	1	8.55352	9.35148	7.75556	10	4	13	6	3	17
Olfr23	0.179653	0.761567	1	13.0499	12.5559	13.5438	14	10	13	14	12	16
Olfr1160	0.196405	0.761965	1	16.9526	16.6645	17.2408	25	20	6	12	18	24
Olfr881	-0.173132	0.761987	1	20.978	22.5985	19.3576	31	15	21	13	25	21
Olfr893	0.195065	0.763866	1	15.2681	13.5713	16.9649	14	12	14	7	27	17
Olfr521	-0.166577	0.765507	1	19.7375	22.0184	17.4566	9	27	28	13	14	29
Olfr731	-0.295576	0.766507	1	10.3108	12.0158	8.6058	24	10	3	2	9	17
Olfr812	0.104017	0.767158	1	56.8351	56.3144	57.3558	44	78	46	46	60	72
Olfr827	0.133833	0.769392	1	29.2486	28.5805	29.9167	34	33	19	29	30	33
Olfr845	-0.229932	0.769511	1	6.24451	6.78656	5.70245	3	10	7	3	9	5
Olfr697	0.18589	0.769567	1	13.8551	13.8959	13.8142	6	14	20	14	12	17
Olfr1385	0.0878889	0.77175	1	152.715	152.508	152.922	122	139	184	173	139	157
Olfr1441	-0.158806	0.773128	1	19.3878	21.1074	17.6682	13	26	23	18	18	18
Olfr1164	-0.383409	0.773442	1	3.32754	4.00757	2.64751	1	8	3	3	0	6
Olfr824	0.187562	0.774507	1	23.5635	22.5946	24.5324	39	14	15	11	35	29
Olfr480	0.259569	0.774787	1	4.71804	4.27342	5.16265	5	6	2	2	7	7
Olfr435	0.148223	0.775227	1	21.3804	20.411	22.3498	20	18	22	14	19	39
Olfr1487	0.115769	0.77548	1	35.9678	35.3719	36.5638	35	31	38	35	30	50
Olfr20	-0.111134	0.777979	1	48.3396	50.2756	46.4036	55	47	47	27	45	76
Olfr355	-0.206129	0.778428	1	9.7708	11.3752	8.1664	22	10	3	10	7	8
Olfr19	0.109176	0.77868	1	49.0543	47.337	50.7716	45	56	40	31	48	83
Olfr270	0.151765	0.779906	1	23.7343	22.224	25.2446	22	31	14	11	34	33
Olfr533	-0.0588899	0.780442	1	433.177	450.535	415.818	506	469	369	419	342	541
Olfr684	-0.12263	0.781774	1	31.7404	34.0955	29.3854	29	19	50	30	13	53
Olfr901	-0.0943516	0.782913	1	58.4299	62.7919	54.0679	55	37	89	46	35	94
Olfr121	0.0938008	0.783274	1	59.7836	59.2021	60.365	51	66	58	59	51	79
Olfr124	-0.0540519	0.784546	1	658.054	682.366	633.742	860	661	521	728	447	813
Olfr99	0.077248	0.784825	1	127.306	126.632	127.979	104	151	120	104	117	182
Olfr365	-0.0842569	0.785754	1	111.605	117.871	105.339	91	146	112	114	86	128
Olfr1462	-0.31042	0.789474	1	2.11288	2.40511	1.82064	0	4	3	0	2	4
Olfr549	0.072834	0.789571	1	141.5	140.207	142.793	132	128	152	109	121	225
Olfr1211	0.114601	0.789618	1	47.1062	47.0572	47.1551	74	46	23	56	29	64
Olfr1161	-0.263734	0.790011	1	5.24815	5.28815	5.20815	8	5	3	2	2	14
Olfr469	-0.135904	0.790216	1	21.0132	22.2271	19.7993	18	28	20	13	24	24
Olfr846	0.300098	0.790895	1	1.46468	1.33571	1.59365	1	2	1	2	1	2
Olfr491	0.0795996	0.791099	1	127.089	125.822	128.355	118	152	105	108	107	192
Olfr1089	0.264609	0.791311	1	2.4996	2.29709	2.70211	2	4	1	2	4	2
Olfr1155	-0.148532	0.79174	1	17.9418	19.3383	16.5452	26	18	14	14	15	23
Olfr1313	0.243573	0.793399	1	8.25225	6.84013	9.66438	4	8	8	19	2	9
Olfr190	0.105492	0.795145	1	42.7765	40.9303	44.6227	37	37	46	35	24	88
Olfr1099	0.111383	0.79572	1	51.6181	49.4174	53.8188	54	57	37	64	25	84
Olfr1387	0.0725822	0.796488	1	155.129	158.986	151.272	120	118	221	133	132	211
Olfr724	0.167639	0.797143	1	18.858	20.2459	17.4701	37	4	19	18	16	20
Olfr345	-0.429778	0.797293	1	1.19933	1.38927	1.00939	2	0	2	0	2	1
Olfr1309	-0.173709	0.797897	1	12.8347	13.302	12.3675	16	15	9	20	4	15
Olfr1196	0.0710179	0.799135	1	182.269	180.849	183.69	209	165	163	146	166	268
Olfr1419	0.135423	0.799399	1	19.0309	19.0237	19.038	19	10	26	19	12	30
Olfr1189	-0.116692	0.800307	1	32.0098	34.0395	29.9801	29	27	43	40	20	33
Olfr1216	-0.0924112	0.800877	1	58.232	59.4717	56.9923	48	64	63	30	46	110
Olfr736	-0.125364	0.80315	1	25.8307	26.456	25.2053	11	26	39	5	27	50
Olfr1278	0.127203	0.804069	1	23.5502	22.8119	24.2886	29	20	19	24	15	39
Olfr403	0.100705	0.805831	1	40.8537	40.3882	41.3192	36	62	24	27	51	49
Olfr1494	-0.0771973	0.80611	1	70.278	73.5238	67.0321	67	69	80	51	64	96
Olfr1168	0.121463	0.807468	1	23.8323	23.1369	24.5278	19	24	25	18	19	42
Olfr957	-0.117069	0.81	1	25.9264	27.7255	24.1273	38	24	21	22	23	30
Olfr116	0.0725234	0.810698	1	95.8546	94.6262	97.0829	83	106	91	72	82	156
Olfr494	0.114916	0.811141	1	25.2254	25.1694	25.2813	21	19	33	22	21	37
Olfr319	0.0876004	0.811271	1	51.3431	51.0274	51.6588	41	61	49	48	42	73
Olfr945	-0.377061	0.811438	1	3.65462	2.88348	4.42576	6	3	0	0	1	15
Olfr1180	-0.160325	0.812141	1	10.3233	11.1115	9.53513	18	5	10	12	3	16
Olfr1130	0.165761	0.812262	1	8.09712	7.80084	8.39339	8	7	8	8	8	10
Olfr1391	-0.0540877	0.812909	1	314.096	325.872	302.319	333	295	333	350	245	341
Olfr318	-0.0920563	0.813575	1	56.6199	60.042	53.1979	85	58	38	51	39	79
Olfr161	-0.160693	0.814535	1	10.9107	11.3794	10.4421	13	12	9	5	9	20
Olfr1270	-0.0817986	0.816188	1	72.8074	74.3766	71.2382	63	85	72	46	50	137
Olfr348	-0.134095	0.817099	1	20.9023	22.0111	19.7936	22	28	16	21	10	33
Olfr490	-0.213205	0.822103	1	4.21545	4.48903	3.94188	3	4	6	7	2	3
Olfr725	0.106343	0.822387	1	27.1746	26.5005	27.8487	33	17	28	35	13	41
Olfr689	-0.0753411	0.822576	1	83.7702	88.5467	78.9938	65	84	109	93	59	94
Olfr181	0.0800588	0.824451	1	74.4364	74.7903	74.0825	108	53	62	58	81	90
Olfr904	0.198918	0.8255	1	5.78417	5.82142	5.74692	9	8	1	4	6	8
Olfr1469	0.162218	0.826504	1	7.28568	7.15955	7.41182	9	4	8	7	7	9
Olfr1310	-0.142897	0.827231	1	14.7345	17.3018	12.1673	42	5	6	22	6	9
Olfr455	-0.0464773	0.82743	1	555.501	578.725	532.278	458	688	565	547	421	702
Olfr1112	-0.0625659	0.827559	1	120.218	124.971	115.465	117	141	113	99	98	168
Olfr998	-0.394957	0.82795	1	3.57637	5.23303	1.91971	14	0	2	0	3	3
Olfr610	-0.0631685	0.827958	1	97.5527	102.432	92.6734	98	85	117	95	81	112
Olfr698	-0.0659971	0.828624	1	76.8718	80.3575	73.386	90	65	82	84	58	86
Olfr1058	-0.161906	0.828935	1	6.83327	7.26515	6.40139	8	10	4	8	7	4
Olfr1359	0.075008	0.829146	1	80.6725	79.2869	82.0581	77	91	68	84	50	129
Olfr776	-0.0688278	0.831479	1	102.116	108.14	96.092	133	69	116	80	99	119
Olfr671	-0.149678	0.832555	1	11.0496	12.1267	9.97247	19	6	11	6	9	17
Olfr1022	-0.3165	0.832703	1	2.19102	2.61807	1.76397	0	7	1	3	2	0
Olfr1277	-0.108046	0.834176	1	23.2062	24.0425	22.3699	29	18	24	23	10	40
Olfr988	-0.099391	0.835153	1	30.5324	32.4293	28.6355	43	22	31	20	29	41
Olfr1015	-0.0779562	0.836751	1	51.366	53.7964	48.9357	68	52	41	38	49	66
Olfr722	0.0736911	0.837578	1	48.8772	48.6763	49.0782	40	57	47	40	49	64
Olfr452	0.0700362	0.839535	1	58.6585	58.5626	58.7545	44	71	58	45	53	88
Olfr1424	0.096666	0.841323	1	37.7076	37.667	37.7482	26	60	27	52	27	37
Olfr191	0.0900207	0.842343	1	39.9694	39.0578	40.8809	31	50	35	57	25	45
Olfr1256	-0.0802811	0.842658	1	54.4931	57.4243	51.5619	83	53	37	46	37	82
Olfr510	0.142443	0.843189	1	15.3359	14.4761	16.1958	18	19	7	23	5	24
Olfr311	0.323838	0.844084	1	1.06618	1.12297	1.00939	0	0	3	0	2	1
Olfr557	0.0585829	0.844398	1	174.625	170.659	178.592	168	159	176	169	98	313
Olfr1465	0.280522	0.845514	1	2.81191	2.56339	3.06042	4	4	0	5	0	5
Olfr47	-0.0755373	0.847253	1	40.0283	41.8974	38.1592	32	31	58	25	26	74
Olfr1106	-0.0768775	0.847275	1	41.1659	42.6366	39.6951	45	39	42	31	29	68
Olfr54	0.0809718	0.84729	1	59.5434	56.6905	62.3963	46	69	53	47	31	129
Olfr120	0.0629232	0.848264	1	71.682	70.2127	73.1514	59	69	78	42	64	130
Olfr591	-0.0947426	0.8494	1	27.1285	28.6896	25.5673	27	38	21	25	19	37
Olfr1386	-0.0370131	0.849484	1	493.511	514.637	472.385	421	490	595	446	435	589
Olfr876	0.0837707	0.850306	1	30.1026	29.8134	30.3917	33	25	30	33	21	42
Olfr585	0.187122	0.850523	1	3.72392	3.36583	4.08202	4	3	3	1	5	7
Olfr1448	0.0520999	0.852153	1	138.929	138.646	139.213	147	135	129	110	136	190
Olfr1370	-0.041886	0.852684	1	302.006	312.6	291.412	357	288	283	296	272	332
Olfr732	-0.122043	0.853058	1	12.0416	12.8754	11.2078	9	23	7	5	14	16
Olfr517	0.242159	0.854336	1	3.80498	3.52455	4.08542	6	5	0	8	0	5
Olfr1006	0.0935967	0.855724	1	28.9128	28.2064	29.6192	33	34	18	19	26	50
Olfr1463	-0.0547326	0.856048	1	187.067	193.769	180.365	210	230	141	145	155	272
Olfr1250	-0.0688239	0.857881	1	42.3304	44.2966	40.3642	39	42	49	39	30	59
Olfr140	0.028136	0.858045	1	1629.3	1674.3	1584.29	1591	1187	2095	1602	1189	2210
Olfr921	-0.0676665	0.859765	1	51.095	53.8464	48.3436	75	51	36	46	40	66
Olfr206	0.0894228	0.860816	1	28.7403	27.7258	29.7549	37	25	21	30	14	53
Olfr393	-0.060817	0.861856	1	55.3712	57.4376	53.3047	53	62	55	41	50	77
Olfr583	-0.771375	0.862987	1	1.10664	1.87162	0.341666	0	0	5	1	0	0
Olfr304	0.157477	0.865336	1	7.7453	7.42563	8.06497	12	3	7	2	9	15
Olfr341	-0.110391	0.867512	1	26.2206	24.8401	27.6011	31	29	15	8	19	66
Olfr806	-0.0537517	0.868999	1	66.0684	68.7123	63.4244	63	72	68	65	53	80
Olfr898	-0.110874	0.869022	1	9.39713	9.83119	8.96308	10	9	10	6	7	16
Olfr94	-0.0879501	0.869506	1	19.6999	20.7322	18.6675	17	22	22	20	13	26
Olfr792	0.101307	0.869598	1	19.6791	19.6569	19.7013	25	27	8	12	21	29
Olfr1356	-0.0899859	0.871327	1	16.4409	17.4729	15.4089	18	12	21	15	11	23
Olfr1497	0.0819282	0.871473	1	22.542	22.5483	22.5358	25	15	26	18	18	36
Olfr1502	-0.132115	0.871754	1	4.99841	5.28815	4.70867	8	5	3	6	5	3
Olfr1186	0.108698	0.872221	1	9.8301	10.1017	9.55852	3	11	15	5	11	14
Olfr933	-0.080073	0.872554	1	24.6297	25.7543	23.5051	22	28	26	23	16	36
Olfr1055	0.344306	0.873868	1	0.775585	0.640848	0.910321	1	1	0	0	1	2
Olfr1254	-0.0567987	0.875172	1	48.1	50.3905	45.8095	42	44	61	37	40	68
Olfr935	-0.103908	0.875678	1	14.4179	14.6923	14.1434	13	20	11	9	8	30
Olfr1016	0.0779949	0.875762	1	28.8601	28.3157	29.4044	25	40	20	17	28	49
Olfr478	-0.0932214	0.876319	1	24.2798	25.5865	22.9731	31	36	11	12	24	37
Olfr493	0.215827	0.876355	1	5.02925	4.80692	5.25158	5	10	0	4	1	13
Olfr974	0.059353	0.880029	1	57.6753	54.5537	60.7969	49	57	55	25	88	73
Olfr616	-0.0912755	0.882006	1	16.5777	16.1921	16.9633	12	14	21	11	5	42
Olfr351	-0.0867576	0.882955	1	13.7087	14.1051	13.3124	13	17	12	10	18	12
Olfr922	0.103177	0.883287	1	8.73605	8.49548	8.97661	9	7	9	11	9	7
Olfr464	0.0405252	0.884658	1	160.186	159.329	161.044	153	162	156	108	164	235
Olfr157	0.0616931	0.884724	1	33.2808	33.0237	33.5379	21	40	36	20	43	40
Olfr142	0.0499824	0.884756	1	68.7779	69.0919	68.4639	59	62	81	85	54	72
Olfr1303	0.0467585	0.885006	1	65.2978	65.777	64.8186	58	62	73	58	53	94
Olfr820	-0.0443257	0.885222	1	126.274	127.859	124.69	112	148	119	72	115	213
Olfr155	0.0607753	0.885346	1	37.2336	36.9174	37.5498	40	39	31	42	24	53
Olfr1197	-0.041252	0.88549	1	114.017	118.382	109.652	142	134	80	107	110	120
Olfr1221	-0.108056	0.885703	1	8.67809	8.76156	8.59463	12	6	8	5	4	20
Olfr735	0.0720901	0.885925	1	22.5277	22.3325	22.723	28	16	22	31	16	23
Olfr1107	-0.0830943	0.885983	1	16.5643	17.5807	15.548	17	11	23	10	16	23
Olfr93	-0.0436108	0.887951	1	121.748	124.165	119.331	134	125	110	101	81	203
Olfr1265	0.0631907	0.88802	1	31.6002	31.0413	32.1591	35	28	29	43	18	40
Olfr303	-0.0504574	0.890084	1	58.6148	61.5576	55.672	42	73	66	56	44	75
Olfr985	0.0902416	0.890158	1	10.5317	10.6345	10.4288	6	12	13	10	8	15
Olfr667	0.0618303	0.89028	1	40.3476	38.4685	42.2266	40	38	36	22	31	86
Olfr1335	-0.177976	0.891652	1	1.43987	1.65558	1.22417	4	0	1	2	0	2
Olfr582	-0.0468831	0.893127	1	75.1093	76.456	73.7625	76	82	69	67	44	128
Olfr122	0.0340581	0.894051	1	188.911	191.142	186.68	153	176	229	139	163	292
Olfr107	0.0434596	0.896516	1	87.5818	87.028	88.1357	92	106	63	56	96	124
Olfr934	-0.0569911	0.896868	1	31.142	32.3764	29.9076	39	27	30	30	21	44
Olfr1261	-0.0354103	0.898683	1	207.124	211.844	202.405	208	230	191	177	147	324
Olfr394	-0.0544035	0.901265	1	32.8842	34.7257	31.0428	48	23	32	30	27	40
Olfr920	0.0666754	0.901332	1	25.276	25.9739	24.5782	12	27	36	21	31	22
Olfr398	-0.0349814	0.901921	1	104.555	108.155	100.955	84	104	128	77	82	164
Olfr55	0.0409247	0.90382	1	112.26	113.504	111.016	74	119	138	118	64	174
Olfr1264	0.0335285	0.904128	1	267.225	264.203	270.247	279	257	247	308	148	408
Olfr525	0.0418096	0.905393	1	197.967	207.155	188.778	92	204	300	188	108	313
Olfr837	-0.162366	0.908084	1	4.84705	6.4067	3.28741	18	2	0	3	1	7
Olfr139	-0.0545935	0.908176	1	27.4959	28.3184	26.6734	23	35	26	17	25	43
Olfr522	-0.0289429	0.90962	1	550.806	561.974	539.638	435	598	617	606	300	820
Olfr971	-0.139955	0.911847	1	4.35451	5.12545	3.58357	14	2	0	4	6	0
Olfr417	0.0484577	0.913146	1	31.24	31.7922	30.6879	35	21	37	34	26	35
Olfr1378	0.102548	0.913512	1	5.49386	6.57625	4.41147	1	2	15	6	2	6
Olfr1290	-0.0500452	0.913711	1	27.3228	28.4237	26.2218	33	23	28	29	20	33
Olfr641	-0.0622231	0.914238	1	15.5547	16.0845	15.0249	12	16	19	11	10	28
Olfr968	0.0679609	0.914482	1	19.9853	20.5186	19.452	10	33	18	20	10	33
Olfr1393	-0.0359897	0.914677	1	63.4519	65.4968	61.4069	69	84	44	51	70	67
Olfr1102	0.0409018	0.91535	1	46.8105	47.9829	45.6381	53	29	58	37	41	66
Olfr975	-0.097249	0.91678	1	4.05093	4.06091	4.04095	3	5	4	7	3	2
Olfr813	-0.0476849	0.917116	1	40.7118	43.1772	38.2463	23	58	46	39	25	58
Olfr1014	-0.0489613	0.918011	1	35.452	35.5279	35.376	39	38	29	34	16	66
Olfr228	0.0550031	0.918927	1	18.6627	18.7003	18.6251	22	13	20	17	12	31
Olfr1262	0.0254938	0.919792	1	210.076	212.804	207.348	197	258	179	210	195	235
Olfr1298	-0.0473767	0.919872	1	26.4216	27.2514	25.5917	23	27	30	17	25	39
Olfr728	0.0348863	0.92114	1	121.954	120.263	123.645	122	140	97	160	63	169
Olfr506	-0.0371518	0.921949	1	47.8038	48.5698	47.0378	45	47	51	35	32	86
Olfr329	0.0317873	0.921984	1	128.377	127.529	129.226	135	138	107	125	79	212
Olfr248	0.160493	0.92201	1	2.29342	2.08391	2.50294	3	0	3	3	4	0
Olfr1034	0.0439713	0.923017	1	35.4296	34.1433	36.7158	26	42	33	15	35	69
Olfr836	-0.101811	0.923552	1	3.60817	3.47363	3.74271	3	2	5	8	2	1
Olfr1013	-0.0309256	0.924656	1	75.2985	77.4648	73.1322	86	88	58	86	54	88
Olfr353	0.0538274	0.924996	1	16.3061	16.5644	16.0478	11	22	16	16	14	20
Olfr43	-0.0243047	0.927053	1	184.898	193.395	176.401	131	191	241	142	169	242
Olfr1279	0.061479	0.927967	1	10.5723	11.0575	10.0871	19	5	9	9	8	15
Olfr1104	0.0231969	0.929845	1	190.764	194.982	186.545	182	159	229	168	179	233
Olfr1036	-0.0433728	0.934381	1	25.5929	25.9688	25.2171	25	21	30	22	34	19
Olfr711	-0.0159274	0.934903	1	525.079	537.944	512.213	586	573	445	537	414	650
Olfr1228	-0.0218592	0.936971	1	353.636	357.818	349.455	335	395	331	373	202	545
Olfr1082	-0.0504989	0.937214	1	16.5839	17.0946	16.0733	16	28	8	7	18	26
Olfr648	-0.0480173	0.939412	1	16.2215	17.3712	15.0717	11	7	31	20	4	25
Olfr1316	-0.0524306	0.939442	1	9.32996	9.88144	8.77848	16	9	5	11	7	9
Olfr482	-0.0666715	0.93985	1	7.63559	7.53123	7.73995	11	9	3	3	5	18
Olfr1484	0.0208059	0.939933	1	140.712	146	135.425	108	114	200	114	114	201
Olfr1269	0.0559924	0.940414	1	12.6102	11.966	13.2544	16	12	8	4	19	18
Olfr111	-0.0271924	0.94054	1	52.0226	53.7986	50.2467	68	45	47	44	47	66
Olfr71	-0.0281628	0.94169	1	42.6524	43.9703	41.3346	55	32	43	43	26	63
Olfr705	-0.0244214	0.942155	1	69.7541	71.3778	68.1304	72	83	58	53	60	103
Olfr373	-0.0315044	0.9438	1	33.4231	33.9319	32.9144	29	29	41	35	15	57
Olfr63	0.025118	0.944413	1	49.6728	50.4945	48.8512	48	43	57	42	48	62
Olfr1009	0.0257027	0.944477	1	46.216	46.9153	45.5167	46	35	56	43	30	73
Olfr295	-0.052024	0.944573	1	7.13174	7.53499	6.72849	4	9	9	5	7	9
Olfr1436	0.247926	0.945418	1	1.21944	0.960938	1.47794	3	0	0	0	4	0
Olfr639	-0.0437004	0.945679	1	15.1345	15.441	14.8281	13	20	13	20	7	20
Olfr930	0.0512323	0.946087	1	10.2695	9.93657	10.6025	10	14	6	18	4	11
Olfr466	-0.0240931	0.9462	1	59.3803	62.4687	56.2918	57	41	83	47	54	75
Olfr170	-0.0192442	0.948635	1	90.6646	92.9118	88.4173	92	101	83	76	79	123
Olfr1426	0.0177535	0.950793	1	122.773	123.583	121.963	130	112	123	117	137	116
Olfr1135	-0.0532806	0.951148	1	9.91514	10.8506	8.97972	2	12	17	8	3	19
Olfr1284	-0.0447718	0.952647	1	7.80234	8.39099	7.21368	5	6	13	7	5	11
Olfr1453	0.0999229	0.953477	1	0.344899	0.320313	0.369485	1	0	0	0	1	0
Olfr775	-0.0308746	0.95382	1	23.4566	23.5617	23.3515	24	25	21	24	11	41
Olfr167	-0.0139216	0.954164	1	268.063	274.834	261.292	260	322	236	231	244	341
Olfr1288	0.0256934	0.955421	1	28.0353	28.3128	27.7577	38	27	20	35	23	27
Olfr112	0.0315201	0.955981	1	37.2	38.6153	35.7847	66	37	15	17	46	48
Olfr678	-0.0298023	0.956282	1	25.7151	26.1233	25.3068	26	38	15	13	25	43
Olfr992	0.0283368	0.956286	1	39.5511	38.9954	40.1067	50	46	22	24	30	77
Olfr825	-0.0331572	0.956433	1	14.0575	14.5879	13.5272	9	19	15	12	16	13
Olfr553	0.0155752	0.956728	1	112.985	114.341	111.63	109	117	112	105	85	164
Olfr1054	-0.0313475	0.95749	1	15.8905	15.9222	15.8588	16	15	16	15	21	11
Olfr38	0.0430567	0.957651	1	5.5	5.39662	5.60339	4	7	5	3	8	6
Olfr1347	0.0149903	0.958501	1	121.769	121.514	122.023	97	114	144	72	99	225
Olfr993	0.063315	0.958705	1	0.680366	0.748649	0.612084	0	0	2	1	0	1
Olfr631	0.084275	0.958842	1	0.34501	0.320535	0.369485	0	1	0	0	1	0
Olfr1094	0.0323573	0.958883	1	24.4323	23.3514	25.5132	22	17	29	23	39	12
Olfr781	0.0276508	0.959135	1	19.9584	20.1965	19.7203	17	25	18	22	14	26
Olfr1428	-0.0134191	0.960054	1	142.248	145.926	138.57	128	144	157	113	141	177
Olfr1093	-0.0171828	0.961885	1	61.5677	62.7899	60.3455	44	62	77	52	34	111
Olfr1496	-0.0173883	0.966104	1	41.3014	41.9384	40.6645	50	40	35	36	27	68
Olfr1120	0.0322827	0.967879	1	10.1588	10.8446	9.47299	19	2	11	10	12	6
Olfr3	-0.0138663	0.967983	1	56.7865	58.7783	54.7947	61	36	74	50	34	93
Olfr467	-0.0191424	0.968419	1	26.0381	27.0931	24.9831	19	27	33	23	20	36
Olfr1178	0.0159341	0.969946	1	37.4569	38.0386	36.8752	48	31	34	29	32	56
Olfr183	-0.0131024	0.970579	1	70.0428	70.9481	69.1375	79	77	56	68	43	111
Olfr342	-0.0138933	0.970714	1	59.256	60.3158	58.1963	63	75	43	77	38	66
Olfr450	0.0197393	0.970975	1	21.3557	21.8047	20.9067	12	21	30	14	29	20
Olfr609	-0.0116538	0.971388	1	68.5488	69.841	67.2565	57	64	83	54	45	119
Olfr138	0.0222638	0.971879	1	17.7744	18.0668	17.482	8	11	32	4	18	35
Olfr128	-0.0163529	0.97282	1	26.6152	27.1934	26.0369	32	26	23	24	19	40
Olfr1348	0.00835142	0.973753	1	357.106	359.827	354.385	372	404	297	270	304	554
Olfr378	0.0151431	0.974167	1	30.3141	30.3465	30.2817	35	27	28	23	38	31
Olfr461	-0.0138248	0.974258	1	51.4619	52.94	49.9838	59	70	31	47	34	79
Olfr1029	-0.0159401	0.974863	1	23.3082	24.153	22.4635	16	29	26	18	20	33
Olfr1053	-0.0500127	0.977613	1	0.357995	0.374324	0.341666	0	0	1	1	0	0
Olfr690	0.00938723	0.978063	1	59.7316	60.592	58.8712	60	52	66	46	48	94
Olfr166	-0.0057936	0.980249	1	417.726	424.518	410.935	458	472	338	318	379	600
Olfr1390	0.0298797	0.981259	1	4.40895	4.16827	4.64964	4	2	6	1	8	5
Olfr1202	-0.0109196	0.983944	1	23.1419	22.8166	23.4672	18	24	25	26	8	43
Olfr867	-0.0121911	0.984915	1	11.2014	11.006	11.3968	9	16	8	6	7	25
Olfr873	0.00667994	0.985478	1	55.0836	55.6729	54.4943	56	57	52	53	37	84
Olfr305	0.00981306	0.986865	1	16.8829	17.0459	16.72	13	18	19	21	9	23
Olfr750	0.00698908	0.98797	1	49.992	50.3219	49.6622	59	63	30	55	25	80
Olfr860	-0.0072003	0.988311	1	24.571	24.0945	25.0475	27	26	19	10	30	39
Olfr815	-0.00867543	0.98864	1	13.0395	13.5167	12.5623	18	9	13	13	11	15
Olfr576	-0.0136261	0.988643	1	6.37469	6.14571	6.60367	2	9	7	4	1	18
Olfr874	0.00523027	0.98878	1	54.9559	55.3008	54.6111	56	50	57	54	32	90
Olfr6	-0.00304023	0.9902	1	264.902	269.283	260.521	255	298	246	300	233	266
Olfr317	-0.00476286	0.991903	1	26.9583	27.3552	26.5614	30	25	26	32	24	25
Olfr390	-0.00243139	0.993232	1	128.722	131.486	125.958	122	161	109	106	117	172
Olfr45	0.00347603	0.993347	1	59.1041	60.6361	57.572	54	92	37	80	35	64
Olfr130	-0.00295279	0.995333	1	21.4895	21.9623	21.0168	19	18	27	24	12	31
Olfr948	-0.00431784	0.995891	1	10.7229	11.4288	10.0169	23	8	4	7	6	20
Olfr1057	0.0020269	0.997789	1	24.4383	24.1485	24.728	26	26	20	16	17	48
Olfr1504	-0.00409757	0.998161	1	3.10137	3.25803	2.94471	5	4	1	3	3	3
Olfr1020	-0.00216153	0.998244	1	23.7315	26.0823	21.3808	18	12	44	19	22	25
Olfr1051	0.000278271	0.998292	1	13.9886	14.7472	13.23	8	24	12	12	13	16
Olfr790	-0.00228439	0.998438	1	16.5286	17.9041	15.1531	14	8	29	19	11	17
Olfr1061	-9.74089e-17	1	1	0	0	0	0	0	0	0	0	0
Olfr108	-9.74089e-17	1	1	0	0	0	0	0	0	0	0	0
Olfr1128	-9.74089e-17	1	1	0	0	0	0	0	0	0	0	0
Olfr1145	-9.74089e-17	1	1	0	0	0	0	0	0	0	0	0
Olfr1367	-9.74089e-17	1	1	0	0	0	0	0	0	0	0	0
Olfr1371	-9.74089e-17	1	1	0	0	0	0	0	0	0	0	0
Olfr1373	-9.74089e-17	1	1	0	0	0	0	0	0	0	0	0
Olfr151	-9.74089e-17	1	1	0	0	0	0	0	0	0	0	0
Olfr153	-9.74089e-17	1	1	0	0	0	0	0	0	0	0	0
Olfr26	-9.74089e-17	1	1	0	0	0	0	0	0	0	0	0
Olfr331	-9.74089e-17	1	1	0	0	0	0	0	0	0	0	0
Olfr384	-9.74089e-17	1	1	0	0	0	0	0	0	0	0	0
Olfr474	-9.74089e-17	1	1	0	0	0	0	0	0	0	0	0
Olfr503	-9.74089e-17	1	1	0	0	0	0	0	0	0	0	0
Olfr504	-9.74089e-17	1	1	0	0	0	0	0	0	0	0	0
Olfr514	-9.74089e-17	1	1	0	0	0	0	0	0	0	0	0
Olfr761	-9.74089e-17	1	1	0	0	0	0	0	0	0	0	0
Olfr834	-9.74089e-17	1	1	0	0	0	0	0	0	0	0	0
Olfr883	-9.74089e-17	1	1	0	0	0	0	0	0	0	0	0
Olfr891	-9.74089e-17	1	1	0	0	0	0	0	0	0	0	0
Olfr926	-9.74089e-17	1	1	0	0	0	0	0	0	0	0	0
