# Supplementary material for: Concentration-Dependent Recruitment of Mammalian Odorant Receptors
Source: eNeuro. 2020 Apr 15;7(2):ENEURO.0103-19.2019. doi: 10.1523/ENEURO.0103-19.2019 (PMC7189481; doi:10.1523/ENEURO.0103-19.2019)
Supplement: Extended Data Figure 2-9. — Differential expression data for 100% TMT. Download Figure 2-9, XLSX file. [file enu-eN-NWR-0103-19-s16.xlsx]

## Sheet: Table 100percentTMT
	EdgeR DE analysis						Read counts
id	logFoldChange	PValueRaw	PValueFDRadjusted	baseMean	baseMeanA	baseMeanB	No1	No2	No3	TMT1	TMT2	TMT3
Olfr531	1.99943	8.84298e-18	9.62116e-15	571.879	212.857	930.9	218	227	134	862	1133	1180
Olfr376	2.35421	5.33687e-15	2.90326e-12	396.492	117.709	675.275	151	96	78	513	945	848
Olfr539	2.19899	1.83437e-14	6.65267e-12	238.189	78.4126	397.966	72	97	45	300	584	477
Olfr1065	2.33742	9.50611e-13	2.58566e-10	147.152	45.1058	249.197	47	32	38	188	299	360
Olfr506	2.60477	1.75527e-12	3.81947e-10	144.858	36.1135	253.603	51	29	22	198	274	388
Olfr1297	2.22376	9.59409e-12	1.73973e-09	130.359	42.0499	218.668	48	37	29	191	252	301
Olfr20	2.19015	1.9927e-11	3.09723e-09	142.171	47.1632	237.18	51	30	41	185	227	390
Olfr1395	1.58836	5.94141e-11	8.08032e-09	492.157	233.873	750.441	182	205	202	548	1135	885
Olfr1474	2.07246	1.31736e-10	1.59254e-08	106.533	38.9635	174.102	33	38	30	161	240	195
Olfr1477	2.28511	4.33692e-10	4.71856e-08	93.2116	29.1143	157.309	31	21	24	112	198	225
Olfr1087	2.35951	1.69595e-09	1.67745e-07	74.3031	22.6636	125.943	21	15	21	83	185	162
Olfr96	1.65015	4.54201e-09	4.11809e-07	258.721	113.59	403.851	99	111	86	262	471	636
Olfr1047	2.22808	1.43006e-08	1.19685e-06	59.3185	18.436	100.201	16	18	14	59	113	167
Olfr1463	1.47129	1.78712e-08	1.38885e-06	272.698	140.866	404.53	109	96	139	297	454	621
Olfr30	1.71482	2.23406e-08	1.62044e-06	649.734	279.18	1020.29	422	237	149	833	1177	1458
Olfr1054	2.36251	4.92896e-08	3.3517e-06	43.5783	12.5411	74.6156	11	13	9	55	70	127
Olfr196	1.86462	2.11131e-07	1.35124e-05	79.8404	32.0355	127.645	33	23	27	95	156	183
Olfr1451	2.17316	3.35788e-07	2.02965e-05	41.3422	14.3919	68.2924	10	11	14	43	87	102
Olfr1133	2.20462	6.73039e-07	3.85403e-05	36.9469	12.6537	61.2401	8	14	10	56	64	88
Olfr1160	2.53184	7.55162e-07	4.10808e-05	32.0026	8.35427	55.6509	10	5	7	34	71	84
Olfr101	-1.65972	8.16437e-07	4.22992e-05	136.83	204.829	68.8309	210	144	175	58	104	74
Olfr1258	-1.71067	1.41707e-06	7.00806e-05	278.362	437.833	118.892	324	192	505	115	160	132
Olfr110	1.29707	1.56132e-06	7.38573e-05	453.619	240.72	666.518	285	225	153	501	872	898
Olfr186	1.71728	1.91041e-06	8.66054e-05	75.3885	36.0338	114.743	30	19	38	122	123	146
Olfr1392	-1.41013	2.7322e-06	0.000118905	173.849	254.895	92.8026	222	125	270	88	92	135
Olfr136	1.35256	4.16627e-06	0.000174342	268.017	140.732	395.301	178	101	103	326	458	560
Olfr1352	1.40725	4.36299e-06	0.000175812	126.37	64.4803	188.259	62	47	56	166	158	312
Olfr1466	2.0448	4.88033e-06	0.000189636	39.5893	13.7161	65.4625	13	10	12	37	69	115
Olfr1457	2.27138	7.77063e-06	0.000291533	26.5769	8.09166	45.0621	8	9	5	34	52	67
Olfr463	1.42371	9.11795e-06	0.000330678	223.887	108.075	339.699	110	111	71	205	414	533
Olfr1093	1.98113	9.6736e-06	0.000333928	89.7056	31.1575	148.254	48	30	14	104	147	250
Olfr140	-0.877794	9.82142e-06	0.000333928	897.989	1135.22	660.759	943	694	1139	607	456	1163
Olfr642	-1.98473	1.01641e-05	0.000335108	69.6043	109.033	30.1752	130	63	93	16	47	40
Olfr1302	2.01423	1.0939e-05	0.000350049	31.6717	12.0379	51.3055	7	13	10	37	58	79
Olfr527	1.14888	1.80658e-05	0.000561588	343.811	198.386	489.236	235	200	117	455	535	674
Olfr338	2.42426	2.35168e-05	0.00071073	24.975	6.50341	43.4466	11	7	2	40	38	69
Olfr1471	1.91113	3.07566e-05	0.00090441	46.0157	17.5609	74.4705	24	11	13	54	115	86
Olfr170	1.38006	3.27715e-05	0.000938299	100.521	51.5985	149.444	52	50	36	170	123	214
Olfr24	-1.12473	3.5778e-05	0.000998114	187.949	250.929	124.969	293	232	163	135	147	145
Olfr52	-1.53194	3.69635e-05	0.00100541	55.6036	80.9038	30.3033	125	54	51	35	27	41
Olfr430	-1.41747	4.76879e-05	0.00126548	107.544	152.194	62.8947	182	84	132	46	54	112
Olfr992	-1.88195	5.43604e-05	0.00140819	27.7396	43.2323	12.247	45	33	35	15	15	12
Olfr92	-1.42928	5.90729e-05	0.00148522	78.8825	114.679	43.0859	99	48	127	29	36	80
Olfr16	-1.20703	6.00639e-05	0.00148522	113.97	154.991	72.948	170	156	98	77	84	88
Olfr806	-1.86165	6.58993e-05	0.0015933	34.9215	52.5634	17.2796	68	47	32	31	23	6
Olfr533	0.904738	7.46168e-05	0.00176485	413.595	270.821	556.368	351	285	138	668	768	478
Olfr177	1.62659	7.91015e-05	0.00183112	38.9463	17.6515	60.241	21	20	9	66	85	56
Olfr433	-1.43969	8.34608e-05	0.00189178	71.682	102.313	41.0509	156	61	70	42	34	63
Olfr141	1.95145	8.91737e-05	0.00194678	33.3053	12.7549	53.8558	26	7	6	60	49	74
Olfr557	-1.22756	8.96206e-05	0.00194678	99.484	135.787	63.1808	136	106	111	61	56	97
Olfr532	1.39262	9.18881e-05	0.00194678	74.1319	37.8336	110.43	52	38	19	108	160	111
Olfr1389	-1.19696	9.30446e-05	0.00194678	102.767	139.175	66.3585	185	117	87	90	80	58
Olfr749	-1.38004	9.94545e-05	0.00204163	168.334	236.404	100.264	333	176	153	74	137	131
Olfr381	2.08031	0.000102045	0.00205602	31.2969	10.4609	52.133	19	9	4	42	58	77
Olfr1283	-1.58355	0.000114643	0.00226786	44.569	64.8722	24.2658	30	79	52	8	31	43
Olfr111	1.31841	0.000123145	0.00239254	98.7577	51.6024	145.913	51	54	34	126	138	230
Olfr32	1.53821	0.000138246	0.00263881	102.195	45.6927	158.698	56	51	23	104	172	261
Olfr67	-1.4748	0.000195397	0.00366538	39.974	57.3138	22.6343	87	59	24	31	30	17
Olfr1370	-1.11264	0.000229712	0.00423605	112.595	150.592	74.5973	171	112	117	76	80	98
Olfr103	-1.82407	0.000244302	0.00443001	23.1679	35.6998	10.6359	38	20	33	13	7	16
Olfr173	1.70832	0.000267533	0.00477174	33.1833	13.9979	52.3686	22	12	7	51	54	73
Olfr1340	-1.05279	0.000310591	0.00543955	217.245	284.32	150.17	324	183	238	119	145	244
Olfr490	2.15328	0.000314974	0.00543955	17.9377	6.88607	28.9894	5	3	8	28	36	35
Olfr1408	-1.31717	0.000347374	0.00587393	49.5514	68.9596	30.1432	78	46	57	31	24	47
Olfr710	-1.93253	0.000360915	0.00587393	18.9183	29.5196	8.3169	28	18	28	7	6	15
Olfr605	-2.0843	0.000364949	0.00587393	18.329	28.5812	8.07686	29	21	24	6	4	17
Olfr1215	-2.10282	0.000366356	0.00587393	15.2544	24.6576	5.85115	18	23	21	5	8	7
Olfr57	1.2408	0.000367121	0.00587393	70.7275	39.0913	102.364	53	36	22	118	105	126
Olfr477	-1.12012	0.000374512	0.00587845	149.596	202.457	96.7345	202	103	200	72	94	161
Olfr411	-1.46043	0.000380677	0.00587845	40.6995	58.2037	23.1952	69	64	31	29	21	29
Olfr1353	1.30075	0.000383612	0.00587845	55.8357	29.7755	81.8959	23	29	24	54	87	136
Olfr122	-1.18222	0.000392718	0.0059344	91.8957	128.168	55.6237	98	89	126	61	64	65
Olfr462	1.50132	0.000402355	0.00599674	102.358	48.8176	155.899	55	72	16	93	233	206
Olfr93	-1.22579	0.000432829	0.00636376	61.6317	84.5464	38.717	85	74	64	40	56	37
Olfr615	-1.14073	0.000451823	0.00652492	112.356	152.678	72.0328	182	87	131	68	78	99
Olfr1341	-1.04307	0.000455785	0.00652492	158.703	212.608	104.798	160	148	210	79	136	142
Olfr1449	1.93724	0.000469772	0.00663781	21.14	7.71242	34.5677	10	8	4	26	48	44
Olfr655	-1.22588	0.000479622	0.00669011	57.9899	79.0197	36.96	102	71	48	41	39	46
Olfr672	-1.07137	0.000506058	0.00696951	142.647	187.709	97.5844	237	155	125	89	122	122
Olfr837	4.11576	0.000558794	0.00759959	4.4929	0.266585	8.71922	1	0	0	8	14	8
Olfr1391	-1.13056	0.000571956	0.00768257	121.013	162.555	79.4724	189	118	126	82	115	76
Olfr594	-1.2655	0.000591868	0.0078434	57.2951	78.5013	36.0888	90	69	54	28	47	48
Olfr316	-1.62035	0.000598347	0.0078434	25.0576	36.6693	13.4459	56	30	20	23	10	13
Olfr1105	-1.90285	0.00065782	0.00852033	21.2507	33.5071	8.99431	34	20	31	11	13	7
Olfr165	1.58991	0.000702143	0.00898743	33.4697	15.3082	51.6312	24	11	9	46	63	67
Olfr1176	-1.1109	0.000717396	0.0090759	78.5378	107.832	49.2441	78	67	113	44	49	74
Olfr618	-2.41114	0.000752767	0.0093991	9.94721	16.7085	3.18587	20	10	14	5	4	2
Olfr669	-1.06512	0.000760221	0.0093991	107.185	141.363	73.0061	172	109	102	70	87	92
Olfr874	1.19584	0.00078327	0.00957526	68.9711	39.2446	98.6975	54	26	28	101	92	142
Olfr809	-1.88309	0.000893688	0.0107316	20.9187	32.5274	9.3099	28	25	29	17	8	7
Olfr455	-0.813377	0.000897586	0.0107316	292.959	362.993	222.925	426	303	255	237	269	256
Olfr1406	-1.10605	0.00094177	0.0111374	69.6665	92.5031	46.83	126	80	55	57	50	53
Olfr180	1.28652	0.00102073	0.0119415	69.6886	38.283	101.094	49	19	33	76	101	165
Olfr1037	-1.40039	0.00113854	0.013178	34.6391	48.9358	20.3425	68	35	33	20	19	30
Olfr1381	-1.19928	0.00122968	0.0140049	45.5384	61.5142	29.5625	87	42	42	47	23	31
Olfr1115	-1.5804	0.00123573	0.0140049	26.6517	39.8826	13.4207	40	24	37	14	18	14
Olfr561	-1.09352	0.00125041	0.0140253	75.1809	100.08	50.2822	148	72	63	59	58	55
Olfr1325	-1.15306	0.00128018	0.0141268	103.742	140.821	66.6619	151	88	124	53	96	79
Olfr1094	1.77378	0.00128544	0.0141268	27.2274	11.5833	42.8714	20	5	8	35	53	58
Olfr1387	-1.05483	0.00131144	0.0142684	71.1761	93.7591	48.5931	118	51	79	68	32	65
Olfr5	-1.4457	0.00132987	0.0143258	28.4953	40.3829	16.6077	51	38	24	28	15	14
Olfr164	1.45789	0.00139628	0.0148937	31.859	15.8075	47.9105	14	12	14	29	65	69
Olfr982	-1.58642	0.00147104	0.0155387	29.3654	44.144	14.5868	57	20	39	16	19	15
Olfr763	-1.8885	0.00158264	0.0165568	18.8089	29.7599	7.85781	60	12	17	10	10	7
Olfr222	-0.891735	0.00162761	0.0168041	327.257	412.81	241.705	565	296	282	213	285	325
Olfr432	-1.61741	0.00164978	0.0168041	20.6445	30.5411	10.7478	44	20	21	17	12	8
Olfr610	-1.25425	0.00165261	0.0168041	69.497	94.6166	44.3774	127	74	62	31	70	51
Olfr516	-1.12628	0.00170657	0.0171921	54.3379	73.3376	35.3381	91	47	58	47	38	36
Olfr901	-1.28602	0.00184238	0.0183409	48.4914	67.9868	28.996	49	46	69	16	45	38
Olfr788	-0.935208	0.00185432	0.0183409	104.451	133.633	75.2692	134	132	92	79	88	90
Olfr215	-1.56551	0.0018731	0.0183597	23.7693	34.5181	13.0206	29	38	24	9	13	22
Olfr345	-4.93551	0.00209176	0.02032	2.17207	4.34414	0	1	2	6	0	0	0
Olfr1328	-1.10707	0.00219767	0.0211598	64.5056	85.2673	43.7438	103	72	58	35	55	59
Olfr693	-1.14617	0.00222631	0.0212474	54.3305	73.4729	35.1881	91	49	57	46	45	30
Olfr550	-1.20958	0.00224582	0.0212474	51.9429	70.8482	33.0376	103	42	51	30	32	50
Olfr895	1.19	0.00230121	0.0215838	49.449	27.9954	70.9027	26	20	25	45	79	116
Olfr178	1.6187	0.00244169	0.0225931	20.4642	9.43595	31.4924	7	12	6	28	34	45
Olfr1217	-1.04671	0.00248094	0.0225931	79.1933	105.099	53.2874	98	81	90	53	78	52
Olfr748	-1.12501	0.00248659	0.0225931	53.2007	70.7289	35.6726	84	61	48	40	55	28
Olfr9	-1.28892	0.00249189	0.0225931	54.6311	76.0745	33.1876	136	35	49	31	25	56
Olfr677	-1.38185	0.0025519	0.022946	32.1631	46.5208	17.8055	48	24	45	27	17	17
Olfr767	-1.88685	0.00266695	0.0235158	11.8813	18.4847	5.27796	18	15	15	8	4	6
Olfr715	-1.0014	0.00269498	0.0235158	88.7792	115.793	61.7653	91	96	103	41	92	78
Olfr1510	-1.27664	0.00271416	0.0235158	36.2105	48.9738	23.4473	64	43	30	41	14	25
Olfr1018	-0.790507	0.00272008	0.0235158	267.016	336.937	197.095	269	216	337	156	232	282
Olfr492	-4.77497	0.00272334	0.0235158	1.53755	3.0751	0	6	1	2	0	0	0
Olfr596	-1.13445	0.00280624	0.0240408	48.9798	65.1938	32.7658	85	46	47	32	29	50
Olfr1386	-0.723347	0.0028841	0.0245148	311.973	377.049	246.897	346	364	280	247	247	345
Olfr936	-3.38703	0.00298968	0.0252153	4.95651	8.76011	1.15292	10	11	4	4	0	0
Olfr1107	-1.73605	0.00305526	0.0255702	15.4725	23.8686	7.07635	21	12	25	9	5	10
Olfr613	-1.7966	0.00325259	0.0268489	12.8975	19.6337	6.16127	21	16	15	10	4	7
Olfr1507	-0.782819	0.00326222	0.0268489	241.758	296.244	187.273	294	311	194	267	210	166
Olfr924	-2.02819	0.00329603	0.0268489	11.3385	17.1556	5.52128	27	14	9	14	2	3
Olfr819	-1.71161	0.00330676	0.0268489	16.9072	25.2093	8.60513	39	15	17	8	6	15
Olfr1104	0.98467	0.00339495	0.0273608	203.016	129.148	276.884	170	82	98	219	374	352
Olfr934	-1.27822	0.00350696	0.0278895	33.2419	47.782	18.7018	30	22	57	17	13	33
Olfr1384	-0.833809	0.00351182	0.0278895	182.737	229.592	135.882	215	174	198	116	180	168
Olfr811	-1.3487	0.00360584	0.0284287	29.801	41.6594	17.9426	41	38	31	18	31	13
Olfr716	-0.942701	0.00377141	0.0295201	97.4352	124.846	70.0243	134	102	95	65	100	75
Olfr823	-2.88317	0.00399995	0.0310854	5.46691	9.75461	1.17921	6	4	12	0	2	2
Olfr1243	1.23025	0.00408447	0.0313136	32.8806	18.6386	47.1226	22	14	14	50	56	55
Olfr199	1.59351	0.00410484	0.0313136	27.3349	13.3929	41.277	12	5	15	24	64	53
Olfr209	1.19528	0.00411567	0.0313136	37.6924	21.5111	53.8737	22	19	16	48	83	54
Olfr31	0.964413	0.00423658	0.0320097	101.704	64.2226	139.186	80	68	34	137	154	183
Olfr332	-0.791542	0.00426662	0.0320144	201.439	251.371	151.507	202	235	205	157	213	150
Olfr1079	0.945958	0.00441458	0.0328977	71.5646	46.754	96.3751	40	34	43	80	90	156
Olfr598	-0.952932	0.00444748	0.0329174	70.0419	88.8127	51.271	122	87	46	65	76	36
Olfr937	-1.72926	0.00453441	0.033334	17.4601	26.681	8.23914	40	12	21	6	10	12
Olfr1036	-1.58706	0.00459639	0.0335031	15.6579	22.8707	8.44521	29	24	12	14	8	7
Olfr683	-1.07564	0.00461899	0.0335031	43.9825	57.94	30.025	61	50	43	27	32	43
Olfr464	0.831899	0.00473269	0.0338891	202.598	135.776	269.42	127	108	114	175	323	416
Olfr129	-1.29132	0.00473451	0.0338891	28.0234	38.6554	17.3913	55	30	24	25	23	12
Olfr1404	-1.18634	0.00483468	0.034126	57.7764	75.7902	39.7626	74	67	58	20	79	38
Olfr109	-1.07842	0.00483505	0.034126	58.312	79.4195	37.2045	76	42	79	34	47	46
Olfr599	-1.0105	0.0048617	0.034126	105.086	136.208	73.9643	189	99	91	66	114	74
Olfr191	1.11181	0.00507861	0.03542	57.652	34.0141	81.2898	52	19	24	73	72	130
Olfr518	-1.14967	0.00516372	0.0357842	89.5986	121.127	58.0699	149	67	103	43	91	65
Olfr577	-1.39827	0.00537124	0.0369867	45.1922	63.819	26.5655	85	34	52	26	49	17
Olfr1299	-1.17554	0.00572775	0.0391937	30.7701	41.716	19.8242	41	43	28	21	27	20
Olfr373	-1.16971	0.00580629	0.0394827	35.225	48.1469	22.3031	56	29	41	21	26	29
Olfr55	-0.866604	0.00625054	0.0420058	82.6136	104.443	60.7844	108	86	81	74	69	65
Olfr558	-1.07687	0.00629275	0.0420058	39.296	52.1496	26.4424	70	33	39	32	24	34
Olfr739	-0.868145	0.00629314	0.0420058	83.2343	104.965	61.5035	104	97	77	68	82	61
Olfr1084	-4.35131	0.00642438	0.0424284	1.22032	2.44064	0	1	3	2	0	0	0
Olfr535	1.00209	0.00644569	0.0424284	72.0171	45.2387	98.7956	57	57	18	96	130	112
Olfr350	0.994476	0.00647346	0.0424284	58.3521	36.1204	80.5838	28	24	36	45	72	154
Olfr630	-1.15297	0.00658026	0.0428702	34.8412	46.4205	23.262	66	39	27	28	19	32
Olfr559	-1.59245	0.00662979	0.0429163	13.9312	20.7861	7.07635	20	12	20	9	5	10
Olfr448	-1.11641	0.0066997	0.0429163	33.9512	45.3056	22.5968	45	47	30	23	25	29
Olfr1385	-0.912383	0.00670602	0.0429163	81.286	104.182	58.3896	96	67	98	43	65	90
Olfr1339	-0.984101	0.00675858	0.0429163	70.6892	91.62	49.7583	136	65	58	49	62	59
Olfr502	1.28631	0.00678457	0.0429163	30.9729	16.3599	45.586	23	18	7	44	48	63
Olfr1132	1.58232	0.00723269	0.0454865	20.9804	10.5582	31.4026	23	3	6	38	30	39
Olfr653	-0.977516	0.00747315	0.0462305	63.6398	82.8147	44.465	120	52	58	47	54	51
Olfr124	-0.696728	0.00749629	0.0462305	289.21	352.152	226.268	310	296	295	283	273	220
Olfr994	-0.996337	0.00751906	0.0462305	48.3316	62.8286	33.8346	73	50	46	35	46	35
Olfr729	-1.04896	0.00752096	0.0462305	41.2718	54.5451	27.9986	50	39	49	36	20	39
Olfr187	1.23062	0.00770765	0.047112	29.7697	17.3618	42.1776	14	10	18	28	49	66
Olfr1233	-1.3365	0.00780683	0.0472053	22.6373	32.3581	12.9166	31	19	31	12	15	17
Olfr372	-1.71525	0.0078097	0.0472053	13.8355	20.4861	7.18497	25	17	14	8	14	3
Olfr476	-1.21443	0.00786252	0.047262	29.6757	42.1389	17.2125	21	24	50	12	15	31
Olfr898	2.18015	0.00792305	0.0473641	7.78339	2.38061	13.1862	5	3	0	14	15	16
Olfr120	-1.04066	0.00807437	0.048005	37.7499	49.6984	25.8013	48	46	37	27	29	32
Olfr666	-0.902375	0.00818949	0.0484248	69.7764	88.4697	51.0832	126	62	59	58	51	65
Olfr65	-0.893142	0.00824962	0.0485167	126.602	160.414	92.7894	246	99	107	90	91	134
Olfr740	-0.770647	0.00834516	0.0488147	343.742	446.945	240.538	289	269	490	276	272	274
Olfr1112	-0.845643	0.00849387	0.0494189	81.0115	103.128	58.895	89	79	92	64	66	71
Olfr786	-1.17023	0.00880521	0.0509578	27.2383	36.752	17.7245	40	36	24	21	25	15
Olfr727	-0.657938	0.00886921	0.0510566	404.136	476.973	331.299	543	532	260	465	307	360
Olfr1402	1.90839	0.00918874	0.0526176	15.6811	4.82125	26.541	6	6	2	6	40	44
Olfr851	0.954064	0.00931873	0.0530826	59.5737	44.0498	75.0977	16	22	57	43	72	138
Olfr1426	0.809007	0.00945773	0.0535938	116.266	78.6667	153.866	73	76	58	115	173	234
Olfr685	-0.905422	0.00974137	0.0549151	87.3571	110.402	64.3123	156	89	67	59	87	74
Olfr522	-0.80057	0.0100902	0.0560443	310.899	383.09	238.708	539	263	262	200	343	274
Olfr570	-1.075	0.0101473	0.0560443	35.0754	45.8641	24.2866	58	29	36	25	17	40
Olfr691	-1.02119	0.0101599	0.0560443	59.0198	77.9747	40.0649	125	44	52	40	51	46
Olfr1361	-0.861243	0.010267	0.0560443	77.3544	98.1144	56.5944	143	46	78	69	43	80
Olfr711	-0.623679	0.0102792	0.0560443	269.813	317.104	222.522	342	297	217	281	239	241
Olfr1164	-2.62967	0.0103403	0.0560443	4.17798	7.15265	1.20331	6	3	8	0	1	3
Olfr1140	-1.30551	0.0103606	0.0560443	20.9589	29.8955	12.0223	15	29	28	8	17	16
Olfr145	-0.910423	0.0104328	0.0560443	59.3968	76.206	42.5875	107	43	58	48	42	55
Olfr574	-3.03016	0.0104477	0.0560443	3.3586	6.12758	0.589607	9	1	6	0	1	1
Olfr943	-1.13869	0.0105042	0.0560443	29.607	39.5685	19.6455	43	45	22	18	24	25
Olfr77	-1.28021	0.0105083	0.0560443	27.8016	38.4257	17.1774	44	20	35	10	18	30
Olfr1330	-0.821565	0.0107739	0.0571803	90.1417	112.008	68.275	124	89	85	63	85	85
Olfr56	-0.83583	0.0109168	0.0574802	81.0271	102.698	59.3563	69	114	79	57	65	80
Olfr713	-1.22493	0.010936	0.0574802	32.5902	46.3064	18.874	30	21	55	10	24	30
Olfr1512	-1.28908	0.0111138	0.0581338	28.4055	38.2689	18.5421	47	35	24	11	37	16
Olfr212	-0.814544	0.0112225	0.0584215	126.053	156.412	95.6941	172	115	125	80	131	116
Olfr1154	1.01898	0.0119012	0.0616595	44.9018	27.0008	62.8028	30	27	17	48	69	96
Olfr1394	-1.22423	0.0120175	0.0619671	22.3273	30.6652	13.9895	35	24	23	19	16	13
Olfr812	-0.976157	0.0121026	0.0621117	40.3218	51.8537	28.7899	59	47	35	30	30	38
Olfr1201	3.21115	0.0127102	0.0649235	2.64439	0.563182	4.7256	0	0	1	6	3	7
Olfr1305	-1.55654	0.0129404	0.0655742	14.701	20.73	8.67194	23	16	16	7	4	18
Olfr1501	-1.00316	0.013012	0.0655742	39.5137	52.0216	27.0057	80	25	39	36	23	33
Olfr263	-0.852172	0.0130184	0.0655742	87.224	108.867	65.5813	100	108	79	103	64	58
Olfr1298	-1.37456	0.0132544	0.0662164	18.2946	26.2152	10.374	29	11	26	8	9	18
Olfr998	-3.31121	0.0132676	0.0662164	2.00184	3.72093	0.282756	5	2	3	0	1	0
Olfr644	-1.07252	0.0133489	0.0663179	42.2888	56.0132	28.5643	70	36	44	24	44	30
Olfr1318	-0.839905	0.0135404	0.0669635	58.8644	73.5336	44.1952	60	68	60	35	49	66
Olfr675	-1.50242	0.013819	0.0680318	12.0298	17.621	6.43856	20	11	15	9	6	7
Olfr1048	1.22412	0.0140309	0.0685908	25.8202	14.2419	37.3985	20	11	9	31	54	43
Olfr33	-0.897024	0.0140586	0.0685908	51.6144	65.3591	37.8696	83	48	47	39	41	49
Olfr478	1.4082	0.0144332	0.0700995	36.3154	16.4311	56.1996	28	16	6	33	49	107
Olfr690	-1.0486	0.0144967	0.0700995	34.0746	44.9144	23.2348	50	34	35	33	29	18
Olfr549	-0.793323	0.0150195	0.0722199	111.751	137.622	85.8801	206	132	65	93	108	93
Olfr1448	-0.793954	0.0150679	0.0722199	76.9898	94.4446	59.535	107	92	60	60	68	75
Olfr597	-0.997916	0.0152264	0.0726595	112.42	146.397	78.4433	217	81	107	61	123	85
Olfr156	-1.03928	0.0155507	0.0738827	32.5343	42.6284	22.4402	41	44	29	34	23	20
Olfr541	0.821848	0.0157677	0.074588	110.183	72.5464	147.82	74	69	51	92	187	223
Olfr13	-1.3019	0.0159374	0.0750646	18.4287	25.3073	11.5501	31	23	16	13	20	7
Olfr1281	-1.12097	0.0162753	0.0763255	29.3246	38.9861	19.663	36	39	28	30	14	23
Olfr270	-1.28883	0.0166933	0.077503	16.7513	23.2273	10.2754	24	24	15	12	10	13
Olfr543	-1.48932	0.0167019	0.077503	14.3136	20.0242	8.60293	28	15	13	12	3	14
Olfr1134	1.10433	0.0167401	0.077503	31.1025	18.312	43.8929	25	14	12	37	60	53
Olfr958	-0.901625	0.0168892	0.0778144	44.8396	57.0195	32.6597	78	36	42	49	33	30
Olfr62	-0.968476	0.0169504	0.0778144	37.7567	48.5832	26.9302	72	39	28	31	30	31
Olfr339	0.829141	0.0179686	0.0821421	68.324	50.9437	85.7043	34	28	57	75	91	125
Olfr1102	0.899873	0.0183474	0.0835229	60.1812	38.8163	81.5461	36	24	37	45	83	147
Olfr698	-1.36954	0.0184736	0.0837471	35.9636	52.7943	19.1328	63	16	54	20	31	15
Olfr63	-1.15615	0.0186642	0.0842601	34.6558	47.0279	22.2836	51	28	42	23	38	16
Olfr44	-1.13346	0.0188113	0.0845729	32.4528	45.0334	19.8723	36	16	53	11	20	36
Olfr362	-0.921238	0.0191148	0.085584	78.3277	105.326	51.3296	154	26	98	59	40	75
Olfr171	0.751786	0.0195996	0.0873949	95.9367	67.4291	124.444	72	72	41	128	136	160
Olfr474	-3.82126	0.0196806	0.087398	0.912412	1.82482	0	0	2	2	0	0	0
Olfr601	-0.809178	0.0199225	0.0880689	54.1807	67.3453	41.0161	82	48	51	50	42	48
Olfr390	0.729335	0.0199936	0.0880689	103.375	76.6042	130.147	64	56	71	119	161	164
Olfr116	-0.834111	0.0201224	0.0880959	56.5302	70.4244	42.636	72	58	55	36	62	48
Olfr609	-0.987619	0.0201617	0.0880959	35.8139	45.8647	25.7632	61	38	29	30	41	18
Olfr792	-1.37081	0.0202933	0.0881918	21.032	30.492	11.5719	24	19	31	17	16	7
Olfr135	2.46238	0.0203457	0.0881918	4.10707	0.882399	7.33174	2	1	0	4	11	10
Olfr1113	-1.45542	0.0205397	0.0882468	14.0859	20.4555	7.71635	24	8	20	5	7	14
Olfr195	1.04559	0.0205417	0.0882468	34.46	20.2721	48.6479	25	18	13	34	56	75
Olfr437	-1.18417	0.020702	0.0882468	19.5963	26.1937	12.9989	32	28	14	15	22	8
Olfr483	-1.93577	0.0207418	0.0882468	9.91848	15.5223	4.31469	9	15	14	9	5	1
Olfr802	-2.07252	0.0208265	0.0882468	4.56875	7.38183	1.75567	14	4	4	2	2	2
Olfr799	-0.927844	0.0209033	0.0882468	35.3288	44.4683	26.1894	64	43	22	43	26	21
Olfr745	-0.821683	0.0209262	0.0882468	142.814	176.707	108.921	263	123	113	87	137	147
Olfr1337	-3.82834	0.0210321	0.088254	1.01939	2.03878	0	0	1	3	0	0	0
Olfr229	-1.43254	0.0210981	0.088254	14.7144	20.4674	8.96146	21	20	14	5	19	7
Olfr1032	-1.1718	0.0211712	0.088254	18.7647	25.266	12.2634	39	20	14	18	12	12
Olfr979	-1.35438	0.0212806	0.0883713	15.3867	21.5337	9.23982	40	15	10	13	14	5
Olfr640	-0.775232	0.0215925	0.0893258	97.7165	118.008	77.4245	161	86	80	78	63	121
Olfr704	-1.89097	0.0217505	0.0896385	6.69214	10.4757	2.90859	9	7	10	6	2	2
Olfr27	-1.18733	0.0220002	0.0898629	18.1427	24.6389	11.6464	29	21	17	13	16	11
Olfr472	-0.962869	0.0220023	0.0898629	193.863	280.062	107.665	163	76	373	95	132	140
Olfr525	-0.77913	0.0221283	0.0898629	99.6702	123.538	75.802	155	79	97	83	101	76
Olfr71	-1.01768	0.0221354	0.0898629	30.884	39.7859	21.9821	39	39	28	14	32	29
Olfr544	-0.754465	0.0226449	0.0915898	127.043	155.347	98.7395	255	126	77	111	108	118
Olfr1101	0.865521	0.0231496	0.0932844	46.2393	31.4797	60.999	28	22	29	46	69	92
Olfr633	-0.802571	0.0240674	0.0966247	84.8361	102.877	66.7952	129	80	72	53	65	108
Olfr810	-0.865766	0.0248007	0.0992027	49.4851	63.2858	35.6844	83	34	52	41	41	40
Olfr976	-1.14147	0.0250422	0.0993184	20.2088	27.2709	13.1467	27	22	22	20	12	13
Olfr769	-0.953349	0.0250875	0.0993184	31.5982	40.503	22.6934	43	38	28	33	26	19
Olfr139	-1.01071	0.0251035	0.0993184	27.0772	35.2123	18.942	60	26	18	28	20	17
Olfr703	-1.14664	0.0257567	0.101529	17.7325	23.8131	11.6519	27	25	14	14	15	11
Olfr986	-1.70576	0.025849	0.101529	6.98685	10.4196	3.55406	12	11	6	3	3	6
Olfr1023	1.33709	0.026397	0.103309	19.1777	9.73983	28.6156	16	6	6	19	33	45
Olfr64	-0.964172	0.0270354	0.105429	40.4103	53.9288	26.8918	46	29	56	24	37	31
Olfr290	0.712193	0.0273465	0.106261	106.661	76.7767	136.545	87	47	66	116	127	219
Olfr1494	-0.999081	0.0275336	0.10633	42.4871	54.81	30.1641	49	76	27	26	27	49
Olfr374	1.08321	0.0275597	0.10633	25.0752	15.1169	35.0335	27	13	6	43	41	36
Olfr59	-0.684632	0.0276778	0.106408	84.8756	101.049	68.7024	133	83	65	95	68	72
Olfr291	0.830591	0.0281107	0.107692	53.034	35.9222	70.1459	54	31	19	74	88	78
Olfr870	-1.31338	0.0282822	0.107968	14.8238	20.1669	9.48077	23	16	15	13	4	15
Olfr1051	2.03476	0.0285167	0.108483	8.76488	3.67624	13.8535	2	9	0	15	12	20
Olfr830	-2.05898	0.0295132	0.111643	4.658	7.20529	2.11071	7	4	7	2	0	5
Olfr94	-1.13337	0.0295525	0.111643	20.7738	28.3931	13.1544	43	13	22	17	14	14
Olfr725	-1.73398	0.0299803	0.112867	8.87694	13.6792	4.07466	23	20	1	8	3	3
Olfr154	-2.06754	0.0301659	0.113174	5.49129	9.22144	1.76115	4	4	12	3	1	2
Olfr723	-0.845284	0.0309777	0.11582	42.2112	52.2889	32.1335	69	39	36	33	29	47
Olfr705	0.83483	0.0312482	0.115981	66.7442	43.9952	89.4932	58	43	24	66	119	120
Olfr578	-0.738262	0.0313868	0.115981	81.5641	98.2407	64.8874	131	91	56	64	72	85
Olfr1469	1.48681	0.0314126	0.115981	13.0342	7.31397	18.7544	5	1	10	9	17	37
Olfr1	0.668061	0.0314471	0.115981	101.616	75.7031	127.528	73	53	67	112	135	186
Olfr987	-1.09573	0.0316634	0.116384	34.0577	44.449	23.6664	72	32	25	15	25	40
Olfr1022	-3.55036	0.0317884	0.11645	0.574492	1.14898	0	3	1	0	0	0	0
Olfr17	-0.543607	0.0321312	0.117287	228.721	264.207	193.236	237	266	192	192	237	231
Olfr738	-1.25743	0.0322674	0.117287	19.5706	27.8147	11.3264	35	11	26	15	15	9
Olfr695	-0.642774	0.0323402	0.117287	113.692	133.997	93.3862	139	126	94	86	133	101
Olfr288	2.63434	0.0326867	0.11815	8.81805	3.73219	13.9039	14	0	0	11	13	23
Olfr1260	-0.785936	0.0328123	0.118211	66.9351	81.2879	52.5823	80	83	55	78	37	64
Olfr121	-0.908532	0.0336652	0.120884	29.8405	38.0211	21.6599	35	37	28	20	28	26
Olfr1294	-0.784733	0.0340709	0.121938	50.4742	62.43	38.5184	83	38	48	41	38	52
Olfr1085	1.07306	0.0344844	0.123013	22.3587	14.5719	30.1454	13	6	16	27	27	48
Olfr877	-1.04346	0.0346922	0.12335	26.0099	33.5677	18.452	33	29	26	33	11	19
Olfr744	-0.970067	0.0352698	0.124951	27.8479	35.4378	20.2581	39	33	24	31	14	24
Olfr569	-1.02034	0.0353722	0.124951	22.7435	29.4075	16.0794	34	26	20	26	13	16
Olfr582	-0.922277	0.036535	0.128454	44.2234	56.5202	31.9265	88	35	37	26	43	40
Olfr487	-1.18905	0.0366	0.128454	14.5397	19.6337	9.44572	21	16	15	11	7	14
Olfr168	-0.680371	0.0370998	0.129489	133.012	156.133	109.891	163	163	99	107	94	171
Olfr1238	0.798881	0.0371329	0.129489	49.6548	33.8269	65.4827	39	30	23	53	94	77
Olfr584	-0.892646	0.0373004	0.129658	31.3766	39.7738	22.9793	57	22	30	28	18	32
Olfr665	-0.643135	0.0378103	0.131012	99.7795	117.411	82.1479	116	88	99	88	63	127
Olfr1362	-0.761473	0.0382724	0.132192	107.809	130.696	84.9231	178	90	92	62	108	119
Olfr1508	-0.802977	0.0389434	0.133762	66.9586	83.4411	50.4762	71	117	42	78	48	47
Olfr988	-1.08511	0.0389729	0.133762	23.8275	31.1911	16.464	27	30	24	27	9	20
Olfr681	-0.75321	0.0397461	0.135685	57.5293	70.6044	44.4542	75	53	57	55	61	37
Olfr366	-1.21419	0.0397826	0.135685	14.5753	19.6677	9.48297	18	20	14	9	7	16
Olfr860	0.875699	0.0402194	0.136746	41.2992	26.0358	56.5625	29	25	17	40	54	97
Olfr1231	1.00669	0.0405434	0.137169	37.9672	23.6963	52.2381	46	15	11	48	49	80
Olfr667	-1.05451	0.0407387	0.137169	20.5971	27.2255	13.9687	36	15	22	24	13	11
Olfr133	0.808929	0.0408254	0.137169	45.0268	30.0607	59.9928	28	26	24	38	66	99
Olfr301	0.913612	0.0408482	0.137169	47.9113	29.6367	66.1859	42	27	16	45	71	108
Olfr1316	-1.66502	0.0417925	0.139909	5.94939	8.94747	2.95131	8	5	9	5	1	4
Olfr875	-0.943354	0.0419791	0.139965	33.7353	42.7182	24.7525	65	34	24	20	27	37
Olfr1500	-0.791253	0.0421093	0.139965	49.1965	60.5242	37.8687	93	62	25	40	53	37
Olfr508	-1.13655	0.0421952	0.139965	17.3831	23.9625	10.8036	29	11	22	14	12	11
Olfr971	-2.09701	0.0427323	0.141315	3.37454	5.5644	1.18469	9	1	5	1	1	2
Olfr1423	-0.804089	0.0431974	0.142125	45.0541	57.1964	32.9118	40	51	51	39	43	31
Olfr1348	-0.645915	0.0432385	0.142125	205.334	241.024	169.645	298	274	117	205	149	223
Olfr1262	0.57852	0.0437412	0.143345	133.148	102.435	163.861	94	99	76	154	212	194
Olfr808	-0.824397	0.0440092	0.14379	35.0775	43.8067	26.3482	54	31	33	28	31	31
Olfr1342	-0.767048	0.0442421	0.144118	51.5702	63.9545	39.186	55	46	59	30	57	47
Olfr282	-1.2237	0.0445828	0.144597	14.1663	18.9318	9.40081	25	19	10	16	5	11
Olfr878	-0.862397	0.0446549	0.144597	29.9613	37.5625	22.3601	49	25	28	27	19	30
Olfr214	-0.997431	0.0453808	0.146511	21.4861	27.0987	15.8735	37	30	12	28	20	7
Olfr1158	-2.13264	0.0464338	0.149467	2.87974	4.5507	1.20878	6	2	4	1	0	3
Olfr1442	-0.657847	0.0467515	0.149856	72.7194	85.7288	59.71	82	70	70	60	48	94
Olfr434	-1.24872	0.0469597	0.149856	12.7868	17.2305	8.3432	13	12	17	3	8	17
Olfr444	-2.29486	0.04709	0.149856	3.01581	5.17787	0.853741	1	6	5	1	2	0
Olfr735	-1.57265	0.0471054	0.149856	10.4335	14.7977	6.0693	25	12	7	2	14	5
Olfr205	0.730276	0.0475133	0.150713	65.5404	47.0467	84.0342	40	30	46	49	104	132
Olfr138	1.21726	0.0477001	0.150865	16.2471	8.5648	23.9294	14	9	3	29	16	36
Olfr1240	-0.624097	0.0482946	0.152303	93.4262	109.448	77.404	134	95	72	81	87	96
Olfr137	-1.26768	0.0488767	0.152763	16.7349	23.67	9.79986	14	20	23	12	17	5
Olfr862	-3.25287	0.0489155	0.152763	0.482522	0.965045	0	1	2	0	0	0	0
Olfr148	-1.52352	0.0491344	0.152763	6.35368	9.23325	3.4741	16	11	2	6	4	2
Olfr1039	-1.17253	0.049219	0.152763	16.9244	23.422	10.4267	17	17	23	10	18	8
Olfr1535	-0.750096	0.0492751	0.152763	42.4132	51.4751	33.3512	49	60	31	28	46	40
Olfr670	-1.06773	0.0492828	0.152763	16.4772	22.1004	10.854	21	15	20	10	13	14
Olfr571	-0.825696	0.0499114	0.153608	89.021	111.493	66.5493	150	58	91	60	108	61
Olfr1056	-1.19361	0.0499632	0.153608	12.8991	17.1744	8.62375	16	16	13	7	6	16
Olfr117	-0.719698	0.0499791	0.153608	44.9136	54.2677	35.5594	58	45	41	39	35	47
Olfr741	0.467873	0.0505156	0.15478	391.438	331.742	451.133	225	246	330	457	472	606
Olfr1124	-0.984966	0.0506449	0.15478	23.2293	29.4981	16.9606	31	35	16	10	27	21
Olfr146	-0.892241	0.0508009	0.154822	25.7749	32.9553	18.5945	28	23	31	15	19	29
Olfr1357	-0.751842	0.0510051	0.15501	43.9882	53.6631	34.3134	81	37	34	40	35	42
Olfr1415	-0.672797	0.0513445	0.155607	72.8571	87.9248	57.7893	97	60	73	61	76	61
Olfr399	-1.08362	0.051522	0.155711	16.7909	22.1382	11.4436	32	18	13	10	14	15
Olfr481	-0.91962	0.0520466	0.156735	34.2866	42.189	26.3842	62	38	22	29	16	44
Olfr53	0.677496	0.052149	0.156735	69.892	50.3448	89.4393	50	56	31	77	100	127
Olfr768	-1.05413	0.0523378	0.156869	16.3368	21.8678	10.8058	17	19	19	10	15	12
Olfr1264	-0.579298	0.0534486	0.159758	123.268	141.866	104.669	161	114	105	106	95	154
Olfr1416	-0.772157	0.0540174	0.161016	42.7152	51.9182	33.5122	57	60	28	31	37	46
Olfr38	1.86762	0.0543479	0.161328	4.80157	2.01273	7.5904	1	5	0	4	13	9
Olfr1487	-0.902067	0.0544792	0.161328	26.9586	33.5529	20.3644	43	31	20	24	15	30
Olfr1110	-0.563536	0.0546449	0.161328	119.141	139.264	99.0179	128	114	116	97	120	121
Olfr1173	-0.883886	0.0548901	0.161328	25.1172	32.3095	17.9249	29	22	30	18	19	24
Olfr132	-0.558323	0.0549931	0.161328	114.778	134.436	95.1207	112	114	115	95	105	124
Olfr807	-0.98481	0.0550556	0.161328	18.6804	24.1397	13.2212	24	25	16	16	12	17
Olfr1026	-1.06772	0.0551601	0.161328	16.5389	22.0551	11.0227	15	13	24	10	6	21
Olfr1497	-0.975468	0.056881	0.165916	22.444	28.9829	15.9051	45	18	19	15	16	23
Olfr1148	-0.992401	0.0573283	0.166338	19.4595	25.7273	13.1916	33	13	22	15	14	16
Olfr1024	-2.03854	0.0573317	0.166338	2.9944	4.79863	1.19016	3	5	4	2	0	2
Olfr225	-1.69766	0.0574874	0.166346	13.09	18.766	7.41406	24	8	17	7	18	1
Olfr150	-0.695854	0.0580577	0.166914	61.6092	76.7195	46.4989	84	33	76	47	46	65
Olfr975	-2.05825	0.05812	0.166914	3.32815	5.19652	1.45977	5	3	5	4	0	1
Olfr68	-1.238	0.0581436	0.166914	19.5519	24.0417	15.0621	32	17	17	6	7	37
Olfr193	0.943778	0.0587911	0.168105	20.9924	13.7987	28.1861	12	11	12	23	35	38
Olfr458	-1.6303	0.0589907	0.168105	7.28605	11.0049	3.56721	12	3	12	1	4	7
Olfr1420	-0.588165	0.0590223	0.168105	109.865	129.37	90.3593	123	104	107	98	122	90
Olfr822	-1.30366	0.0599791	0.170384	10.0112	13.4721	6.55028	15	11	10	3	6	13
Olfr1232	-0.659492	0.0602606	0.170738	54.3465	64.5363	44.1567	59	43	60	40	34	75
Olfr1257	-0.587813	0.0611746	0.172878	99.2507	114.952	83.5496	111	88	97	99	60	124
Olfr1166	1.12371	0.0614475	0.173199	17.1984	9.10536	25.2915	11	8	6	14	22	49
Olfr606	-0.858315	0.0622097	0.174894	33.1228	41.2126	25.033	67	33	21	24	25	36
Olfr370	-0.528569	0.0628489	0.176236	141.158	161.053	121.263	193	130	114	137	121	155
Olfr1076	-2.38686	0.0631244	0.176529	2.41839	3.91623	0.920552	1	4	4	0	0	3
Olfr181	0.630109	0.0633953	0.176529	60.7355	45.823	75.648	36	36	42	59	75	122
Olfr813	-0.804865	0.0634401	0.176529	34.6468	42.8381	26.4556	72	29	24	30	25	35
Olfr1303	-0.816518	0.0645164	0.179066	29.0667	36.7475	21.3859	38	23	33	26	22	25
Olfr45	0.828616	0.0650895	0.180197	34.5501	22.998	46.1022	31	18	15	35	59	63
Olfr611	-0.851759	0.0653047	0.180334	27.5563	34.3787	20.7338	45	27	23	19	29	23
Olfr728	0.652855	0.0659692	0.181708	74.4398	54.1636	94.7161	62	61	29	98	94	130
Olfr198	-1.287	0.0666182	0.182812	10.0361	14.448	5.62426	7	7	18	2	7	10
Olfr944	-1.07142	0.0667062	0.182812	19.8289	25.1194	14.5384	30	20	18	6	16	27
Olfr211	-0.457699	0.067519	0.184175	305.209	339.007	271.41	406	277	238	275	265	382
Olfr461	-0.8221	0.0675421	0.184175	35.3144	45.1529	25.4759	32	71	21	28	29	30
Olfr983	-0.672531	0.0683216	0.185835	65.4176	81.0223	49.8129	93	32	80	49	47	73
Olfr1106	-1.07144	0.0685267	0.185928	27.0197	35.745	18.2944	59	17	25	13	33	17
Olfr1411	-0.544452	0.0702766	0.190201	103.702	118.574	88.8305	140	123	68	99	121	85
Olfr11	0.607669	0.07072	0.190741	59.7374	44.8663	74.6086	51	46	27	98	88	70
Olfr1167	-1.09785	0.0708743	0.190741	14.008	18.6238	9.39206	32	16	8	10	10	12
Olfr1424	-0.74348	0.0710457	0.190741	35.0429	42.7982	27.2876	41	59	20	37	36	21
Olfr784	-0.851865	0.0711774	0.190741	23.9496	30.132	17.7672	33	24	23	20	24	17
Olfr1287	2.23569	0.0715213	0.1908	2.77199	0.799754	4.74422	3	0	0	5	3	8
Olfr1216	-0.867313	0.07155	0.1908	35.0303	44.9247	25.136	38	19	50	12	30	43
Olfr1153	2.24541	0.0721058	0.190933	2.49637	1.12636	3.86638	0	0	2	4	2	7
Olfr361	-0.850763	0.0721235	0.190933	24.7683	30.7931	18.7436	40	27	19	17	24	23
Olfr360	-0.64872	0.0721265	0.190933	78.4167	90.2466	66.5869	97	86	61	49	64	112
Olfr1289	-1.3528	0.072417	0.191237	7.68165	10.641	4.72233	7	9	10	1	7	8
Olfr566	-0.942268	0.0729479	0.192173	18.4772	23.5578	13.3966	35	23	11	14	19	13
Olfr1163	2.06921	0.0739845	0.194433	2.05153	0.615815	3.48725	1	1	0	4	5	3
Olfr424	-1.0302	0.0743147	0.194568	13.6899	17.7828	9.59706	22	18	10	9	15	9
Olfr564	-3.02352	0.0743938	0.194568	0.399877	0.799754	0	3	0	0	0	0	0
Olfr1383	-0.749159	0.0751459	0.195049	46.3109	56.5011	36.1206	66	34	48	25	48	50
Olfr801	-0.717435	0.0751667	0.195049	37.2489	45.1556	29.3423	40	52	29	32	31	37
Olfr1368	-0.588492	0.0752372	0.195049	72.813	84.2763	61.3498	103	74	55	64	66	79
Olfr201	0.899941	0.0752946	0.195049	28.8135	17.2797	40.3473	18	18	11	20	42	74
Olfr410	-1.09473	0.0760356	0.196501	18.4024	24.95	11.8547	48	9	16	17	17	7
Olfr585	-1.53891	0.0766224	0.197548	3.80614	5.56837	2.0439	8	5	3	3	2	2
Olfr824	-1.47918	0.0769046	0.197807	17.742	27.1538	8.33021	13	13	34	15	12	2
Olfr523	-0.455862	0.0773833	0.198568	266.85	296.01	237.689	284	297	207	197	273	338
Olfr661	-0.765503	0.0779655	0.199278	38.9102	47.6702	30.1502	69	29	34	39	43	22
Olfr143	1.09531	0.0780263	0.199278	19.7206	12.6502	26.7911	27	14	1	32	35	25
Olfr736	-0.938841	0.0788969	0.20103	18.0739	23.2126	12.9352	19	31	13	11	15	18
Olfr1277	-1.11081	0.0805605	0.204789	14.4214	19.3038	9.539	13	26	12	16	12	5
Olfr920	-1.00352	0.0811897	0.205908	15.1126	20.009	10.2162	20	13	18	10	14	11
Olfr328	-0.589182	0.0818133	0.207007	94.9913	110.59	79.3929	94	103	88	108	60	102
Olfr317	-0.872746	0.0821603	0.207402	26.145	32.8317	19.4583	55	23	18	19	31	17
Olfr1052	-0.736127	0.0827777	0.208477	36.9281	43.886	29.9702	42	42	32	17	42	43
Olfr1100	-1.02898	0.0843675	0.21199	14.9239	20.2343	9.61348	14	15	20	12	12	9
Olfr612	-1.10141	0.085317	0.213882	13.7262	17.9289	9.52348	13	14	17	12	3	17
Olfr220	0.458634	0.0856188	0.214145	261.056	205.908	316.205	232	169	151	295	288	488
Olfr485	-1.23795	0.0866141	0.216138	9.54414	13.5922	5.49611	7	11	14	5	10	4
Olfr805	-0.540498	0.0877472	0.218465	76.066	87.3475	64.7844	95	76	63	76	67	78
Olfr770	-0.983353	0.0883312	0.219416	12.3326	15.9054	8.75974	21	15	9	11	10	9
Olfr473	-0.83347	0.0897263	0.222374	22.5772	28.8065	16.3479	23	23	26	19	20	17
Olfr1220	1.00533	0.0904853	0.223745	15.0545	9.67649	20.4325	9	16	3	20	28	22
Olfr520	-1.06974	0.0910246	0.224431	9.80255	12.9429	6.66217	12	15	8	7	11	5
Olfr1364	-0.544295	0.091175	0.224431	123.351	142.834	103.869	111	163	100	116	95	142
Olfr1308	-0.918403	0.0914806	0.224675	16.624	21.1393	12.1088	19	17	18	15	8	18
Olfr628	-1.042	0.0921121	0.225646	12.5317	15.988	9.07534	20	16	9	17	5	9
Olfr1250	-0.829596	0.0925575	0.225646	27.0065	32.8318	21.1811	40	28	22	15	39	19
Olfr1271	-0.549159	0.0926866	0.225646	85.1464	100.604	69.6887	101	61	93	85	73	80
Olfr1284	-1.36815	0.0928152	0.225646	4.91173	6.91266	2.91079	7	8	4	2	5	3
Olfr1324	-0.614353	0.0929922	0.225646	50.0277	58.0232	42.0322	63	60	36	61	55	29
Olfr1462	2.35018	0.0934058	0.225646	1.51273	0.34923	2.67622	0	1	0	2	2	5
Olfr131	0.493746	0.093511	0.225646	286.413	220.1	352.726	251	229	130	302	346	547
Olfr414	-0.536354	0.0935353	0.225646	96.3705	109.802	82.9396	133	100	70	80	100	103
Olfr6	-0.465873	0.0966071	0.232533	151.085	169.137	133.033	173	141	131	123	140	189
Olfr933	-0.895295	0.0968174	0.232533	16.241	20.7074	11.7746	20	15	18	10	13	17
Olfr887	-0.785624	0.0974172	0.233458	23.3029	29.2684	17.3375	20	25	27	14	21	24
Olfr18	-0.950674	0.0989871	0.235815	14.5281	18.7326	10.3236	15	18	15	12	8	15
Olfr283	0.86533	0.0990099	0.235815	19.5449	13.514	25.5757	10	23	5	21	43	24
Olfr308	-0.612512	0.0993069	0.235815	47.6722	55.8186	39.5258	62	48	40	46	56	34
Olfr287	-0.693569	0.0993157	0.235815	53.343	63.5287	43.1574	82	79	25	62	33	52
Olfr1010	-1.68547	0.0995336	0.235815	3.76629	5.54233	1.99024	9	9	0	2	5	0
Olfr119	-0.816141	0.0997014	0.235815	31.6379	40.0552	23.2206	48	20	36	26	35	19
Olfr885	-1.67168	0.100248	0.236593	5.01928	7.47187	2.5667	8	4	7	4	5	0
Olfr1082	1.34323	0.100476	0.236619	11.0218	6.36073	15.6828	16	6	0	14	26	14
Olfr821	-0.76556	0.101394	0.238266	43.3322	54.2786	32.3857	34	44	53	55	27	29
Olfr161	-1.10782	0.102327	0.239818	8.99485	11.8952	6.09446	12	12	8	11	6	4
Olfr78	-0.866791	0.10267	0.239818	38.7848	49.7836	27.7859	85	18	37	18	30	46
Olfr804	-1.19172	0.102716	0.239818	10.604	13.4947	7.71324	18	12	8	10	16	1
Olfr912	0.779907	0.10676	0.248725	33.638	24.5448	42.7312	51	12	12	49	48	49
Olfr1014	-0.840921	0.10802	0.251123	20.8954	25.5253	16.2656	30	26	15	16	13	26
Olfr272	-0.951814	0.108442	0.251567	16.3472	20.6479	12.0464	27	24	9	8	16	17
Olfr1436	-2.67655	0.11001	0.254187	0.34923	0.69846	0	0	2	0	0	0	0
Olfr304	-1.66974	0.110039	0.254187	2.44548	3.7249	1.16607	4	6	1	2	1	1
Olfr1513	-0.691084	0.110862	0.255547	30.4697	36.7326	24.2068	63	20	23	38	23	22
Olfr1205	-0.895889	0.111323	0.256066	15.2704	19.1497	11.391	24	22	9	18	10	11
Olfr453	-0.919542	0.111814	0.256487	12.6003	16.0781	9.12245	14	16	12	8	10	13
Olfr893	1.42145	0.111977	0.256487	4.89501	2.5459	7.24411	3	5	0	10	10	5
Olfr955	-1.4244	0.113721	0.259934	6.85561	9.57851	4.13272	17	8	4	1	6	7
Olfr1126	-1.2152	0.114534	0.261244	5.64191	7.79109	3.49272	10	5	6	5	4	3
Olfr881	-0.897518	0.114815	0.261337	14.061	17.8389	10.283	19	14	14	9	12	14
Olfr294	-2.31649	0.11762	0.266958	0.931808	1.58086	0.282756	2	3	0	0	1	0
Olfr668	-0.674898	0.117776	0.266958	29.5733	35.3958	23.7508	44	21	29	36	18	27
Olfr1042	-0.756977	0.118246	0.267468	22.7368	27.77	17.7035	32	18	23	16	17	27
Olfr1459	-0.619125	0.119445	0.269619	37.3173	43.8142	30.8205	34	35	40	25	26	53
Olfr818	-0.936836	0.119923	0.270136	20.6842	27.9948	13.3736	23	11	32	23	13	10
Olfr910	0.571659	0.121566	0.272997	56.1154	42.3759	69.8549	42	28	38	47	70	119
Olfr889	-0.873059	0.121694	0.272997	16.0964	20.0916	12.1011	19	14	18	18	6	17
Olfr1270	-0.520814	0.123786	0.277117	70.9004	79.8486	61.9522	67	63	71	42	58	109
Olfr978	-0.830909	0.124058	0.277156	15.8755	19.7462	12.0047	33	12	12	18	10	13
Olfr782	-0.890804	0.125715	0.280282	14.9468	19.4792	10.4145	14	8	23	11	5	19
Olfr1009	-0.62235	0.126181	0.280746	36.4469	42.9169	29.9769	57	31	30	37	39	27
Olfr800	-0.819977	0.126636	0.281183	21.2989	26.3092	16.2886	22	15	27	7	19	29
Olfr643	-0.929326	0.12693	0.281262	13.9753	17.2457	10.7049	21	14	12	8	8	20
Olfr774	-1.92547	0.127477	0.281655	2.56693	4.26149	0.872363	2	1	6	0	2	1
Olfr309	0.41742	0.128098	0.281655	501.288	406.565	596.012	479	297	311	455	841	740
Olfr1162	-0.802054	0.12827	0.281655	18.2824	22.7988	13.7659	21	17	20	21	11	15
Olfr48	-0.745713	0.128288	0.281655	29.1954	37.4081	20.9826	27	22	40	26	26	20
Olfr1033	-1.02636	0.128402	0.281655	10.0163	13.5995	6.43308	17	5	13	8	7	7
Olfr1511	-0.616341	0.129059	0.282055	63.9138	75.1785	52.6492	135	59	33	55	52	72
Olfr568	-1.52354	0.129102	0.282055	4.36961	6.16157	2.57764	6	5	5	6	3	0
Olfr281	-0.482436	0.129676	0.28274	174.041	196.592	151.49	199	153	160	218	192	112
Olfr702	-0.988449	0.13034	0.283621	22.032	31.0247	13.0394	23	10	38	18	18	9
Olfr1249	-1.17565	0.130672	0.283775	6.48464	8.82013	4.14914	6	11	6	4	3	7
Olfr223	1.65818	0.132528	0.28667	2.43592	1.09635	3.77548	2	0	1	5	5	3
Olfr231	-0.844492	0.132532	0.28667	18.9092	23.5843	14.234	37	28	7	12	24	13
Olfr688	1.72064	0.133343	0.287303	2.83193	0.882399	4.78146	2	1	0	3	3	10
Olfr456	-3.06708	0.133353	0.287303	0.666462	1.33292	0	5	0	0	0	0	0
Olfr262	-1.44154	0.133856	0.287419	4.39699	6.43555	2.35843	2	4	8	0	4	4
Olfr876	-0.816984	0.133954	0.287419	18.3658	23.0545	13.6772	46	18	8	18	17	12
Olfr1310	-1.85746	0.134199	0.287419	5.59318	7.15663	4.02974	5	7	6	13	1	0
Olfr1121	1.39582	0.134804	0.288147	5.34609	2.7785	7.91367	7	1	1	7	10	10
Olfr960	-1.02852	0.13577	0.288907	8.26463	10.6562	5.87304	15	11	5	9	4	7
Olfr10	-2.21641	0.136411	0.288907	1.66979	2.72587	0.613701	6	0	2	0	0	2
Olfr552	-0.501267	0.136739	0.288907	88.9962	101.322	76.67	159	72	60	91	97	75
Olfr412	-1.00937	0.136898	0.288907	8.31254	10.7575	5.86757	18	9	5	8	5	7
Olfr1344	-0.828075	0.137235	0.288907	16.5474	20.5574	12.5374	30	15	13	12	18	13
Olfr123	-0.600606	0.137239	0.288907	44.7228	50.5735	38.8722	40	53	38	22	38	71
Olfr125	0.606528	0.137281	0.288907	42.5287	31.1271	53.9303	32	26	24	34	66	83
Olfr656	-0.587511	0.137284	0.288907	42.3908	49.0643	35.7173	76	47	22	47	35	40
Olfr639	-1.0001	0.137702	0.289227	7.73788	9.95775	5.518	15	9	5	9	6	4
Olfr553	-0.501782	0.138455	0.289578	93.0195	103.783	82.2565	137	91	63	87	72	120
Olfr419	-0.581467	0.138612	0.289578	79.3131	91.0614	67.5648	138	78	48	53	84	93
Olfr203	0.915737	0.138668	0.289578	18.4292	12.1465	24.712	20	5	9	17	31	36
Olfr724	0.845902	0.139066	0.289853	19.1735	13.6295	24.7174	15	5	14	18	30	36
Olfr1428	-0.478821	0.140374	0.29173	96.4162	109.441	83.3911	94	111	81	112	82	91
Olfr1444	0.872818	0.140503	0.29173	19.3581	12.2291	26.4872	19	6	9	17	21	51
Olfr589	-2.31297	0.141027	0.292261	1.55372	2.54193	0.565512	4	1	2	0	2	0
Olfr556	-0.512105	0.141651	0.292998	62.9285	73.9565	51.9006	55	44	78	38	58	80
Olfr959	-0.508028	0.142503	0.29376	55.4943	64.2923	46.6962	61	44	58	49	49	61
Olfr202	0.688136	0.14256	0.29376	27.558	19.2018	35.9143	22	14	15	29	28	64
Olfr969	-0.554645	0.143232	0.294586	44.1295	52.3631	35.8958	52	28	51	40	33	49
Olfr1288	-0.818538	0.143644	0.294877	14.1596	17.5802	10.739	16	22	10	11	17	9
Olfr1378	-1.61677	0.144704	0.296494	3.81295	5.61703	2.00886	10	2	4	1	5	1
Olfr619	-0.90156	0.145444	0.297449	10.8212	13.6861	7.95639	15	10	11	6	9	12
Olfr1349	-0.484042	0.146997	0.299383	125.893	142.343	109.443	200	163	57	142	111	121
Olfr467	0.615442	0.147483	0.299383	35.3601	26.081	44.6391	35	27	13	48	46	58
Olfr918	-1.01081	0.147798	0.299383	12.4721	16.7346	8.20958	19	6	17	5	12	11
Olfr746	-1.01015	0.147821	0.299383	10.0803	12.421	7.73954	19	13	5	6	18	3
Olfr938	-1.1565	0.148403	0.299383	5.19261	7.15663	3.22859	5	7	6	4	3	4
Olfr974	-0.542059	0.148443	0.299383	42.9047	49.0598	36.7495	59	39	35	41	35	49
Olfr1157	-0.651165	0.148536	0.299383	28.0008	32.9597	23.0419	45	31	18	23	32	24
Olfr572	-0.925467	0.148659	0.299383	20.7216	25.811	15.6322	38	32	8	8	20	25
Olfr635	-0.831026	0.148866	0.299383	17.1711	21.0793	13.263	23	17	16	16	23	7
Olfr1489	0.92405	0.149362	0.299827	10.0233	6.89004	13.1566	4	7	6	13	17	15
Olfr1499	-1.60954	0.14991	0.300372	2.29816	3.45434	1.14197	4	2	3	2	2	0
Olfr39	-0.984752	0.150257	0.300513	10.8946	14.2305	7.55863	26	8	8	7	12	7
Olfr846	-1.68406	0.151067	0.30158	2.05985	3.21777	0.901931	1	2	4	1	0	2
Olfr494	-0.747491	0.151402	0.301695	18.514	22.4948	14.5331	27	18	16	15	22	13
Olfr446	-0.483257	0.152533	0.303393	93.8297	106.184	81.4752	136	68	82	74	89	114
Olfr259	0.772518	0.154297	0.306342	16.0878	11.1668	21.0089	14	10	7	22	28	22
Olfr1057	0.667758	0.154777	0.306735	25.035	18.2894	31.7806	22	13	14	29	34	45
Olfr1208	-0.469191	0.155119	0.306853	90.4608	100.759	80.1629	78	79	93	77	52	141
Olfr495	-0.977203	0.156626	0.308997	9.25101	11.9813	6.52071	7	8	13	2	8	12
Olfr183	-0.659332	0.15677	0.308997	29.7434	36.3322	23.1547	23	51	22	26	25	28
Olfr1118	0.995863	0.158024	0.310905	7.79522	4.73861	10.8518	7	5	2	14	10	13
Olfr509	-0.496401	0.158506	0.311289	72.2031	81.0845	63.3216	101	68	54	55	93	69
Olfr482	-0.861347	0.159892	0.313446	12.7198	15.4962	9.94335	10	19	11	3	18	13
Olfr118	-0.996803	0.160867	0.314791	14.6283	19.881	9.37564	30	5	18	7	13	12
Olfr12	-0.420841	0.162288	0.317	118.073	130.888	105.259	163	102	92	114	128	118
Olfr1198	-0.570975	0.162959	0.317741	34.0169	39.7293	28.3045	39	34	31	37	32	28
Olfr429	-0.673554	0.163877	0.318512	24.0224	28.4956	19.5492	37	34	12	18	28	21
Olfr1020	-0.725469	0.16394	0.318512	17.9638	21.973	13.9545	19	21	17	17	19	12
Olfr554	-0.654668	0.166163	0.322189	26.3487	31.0376	21.6599	41	35	14	20	28	26
Olfr1034	-0.868718	0.166659	0.322189	17.7354	22.1303	13.3406	34	10	17	7	14	24
Olfr1151	2.50425	0.167251	0.322189	0.288229	0	0.576459	0	0	0	2	0	0
Olfr697	-0.890238	0.167519	0.322189	9.70838	12.4664	6.9504	10	20	5	8	11	5
Olfr70	-0.996295	0.167533	0.322189	8.33991	10.581	6.09886	11	9	8	3	12	6
Olfr726	-0.395241	0.167705	0.322189	193.054	210.101	176.008	277	216	108	242	162	197
Olfr689	-0.469087	0.167906	0.322189	67.7922	77.2012	58.3833	91	50	63	75	66	59
Olfr907	1.37337	0.168286	0.322351	4.14107	1.93009	6.35205	2	4	0	2	15	5
Olfr460	-0.687769	0.170064	0.324454	21.3008	25.24	17.3616	25	29	15	14	20	25
Olfr1309	1.24593	0.170218	0.324454	5.08054	3.13513	7.02596	2	1	4	13	4	7
Olfr620	-1.04454	0.170545	0.324454	6.18169	8.25695	4.10642	6	11	5	5	4	5
Olfr603	-1.29228	0.170577	0.324454	4.66082	6.36813	2.95351	11	5	3	1	4	5
Olfr827	-0.736856	0.17105	0.324494	16.8426	20.5428	13.1424	10	27	15	6	23	16
Olfr676	-0.73202	0.17153	0.324494	16.994	20.7373	13.2508	33	10	15	17	10	18
Olfr547	-1.43489	0.171763	0.324494	3.08456	4.37073	1.79839	3	7	2	1	1	4
Olfr545	-0.862205	0.171791	0.324494	12.8444	15.9766	9.71206	26	13	8	8	11	14
Olfr1122	-0.7824	0.172962	0.32614	16.88	21.7772	11.9829	20	10	23	14	14	13
Olfr1263	-0.42743	0.174586	0.328633	91.3642	103.447	79.2811	76	85	95	82	72	115
Olfr1502	-0.909182	0.176331	0.331343	8.85676	11.2268	6.48674	10	10	9	9	4	9
Olfr1222	-0.393048	0.176698	0.331462	116.546	127.681	105.411	141	108	93	123	102	134
Olfr147	-0.564936	0.1778	0.332955	31.4422	36.1889	26.6956	40	36	23	31	27	33
Olfr1445	-1.67743	0.178881	0.333704	2.29172	3.44695	1.1365	9	3	0	1	3	0
Olfr1356	-0.771312	0.178889	0.333704	13.3688	16.5586	10.179	15	15	13	12	14	9
Olfr441	-0.50127	0.17912	0.333704	43.7872	49.6118	37.9627	50	41	39	34	41	54
Olfr1350	-0.47843	0.180751	0.336166	66.4738	74.2697	58.678	101	63	45	54	70	76
Olfr798	-0.645546	0.181143	0.33632	22.4232	26.4337	18.4127	31	23	18	17	25	21
Olfr996	-2.01711	0.181527	0.336459	0.825583	1.36294	0.288229	3	0	1	1	0	0
Olfr957	-0.738863	0.182206	0.337144	16.6234	19.6037	13.6431	23	16	14	15	8	23
Olfr908	2.37479	0.185163	0.342033	0.282756	0	0.565512	0	0	0	0	2	0
Olfr1234	-0.769344	0.18567	0.342388	15.3417	18.5187	12.1647	15	19	14	12	8	21
Olfr780	-0.647851	0.18604	0.342489	20.0908	23.6178	16.5639	31	23	13	20	23	14
Olfr692	-0.44315	0.187148	0.34311	86.4071	95.9721	76.8422	135	75	60	84	108	72
Olfr320	1.77505	0.187196	0.34311	2.14745	1.04769	3.24721	0	3	0	3	3	5
Olfr888	-1.05287	0.187428	0.34311	5.29541	7.09263	3.4982	10	3	6	6	3	3
Olfr890	0.922588	0.187638	0.34311	8.12947	5.28314	10.9758	3	8	3	7	23	8
Olfr1221	-0.963089	0.18829	0.343723	6.51709	8.38086	4.65331	12	10	3	6	6	4
Olfr747	-0.509031	0.189175	0.344762	40.5331	45.944	35.1222	49	49	28	46	35	39
Olfr1490	-0.749397	0.192149	0.349595	12.9809	15.7214	10.2403	19	16	9	10	13	12
Olfr1321	-0.424251	0.192959	0.350143	65.372	72.4417	58.3023	75	76	46	69	74	57
Olfr791	-0.573153	0.193372	0.350143	34.0613	39.2747	28.848	52	26	29	23	33	42
Olfr1280	-0.628396	0.193415	0.350143	31.7298	37.4993	25.9603	27	40	29	44	22	23
Olfr43	0.364948	0.1938	0.350257	160.591	135.218	185.963	120	144	94	202	200	232
Olfr420	-0.498439	0.195813	0.353307	45.2889	51.6429	38.9349	85	33	31	49	40	44
Olfr218	-0.780438	0.196906	0.354209	20.6534	23.9704	17.3364	27	19	18	5	28	26
Olfr95	-0.733196	0.196964	0.354209	14.3105	17.5916	11.0295	10	25	11	8	20	10
Olfr1013	-0.525571	0.198141	0.355364	39.0568	45.0792	33.0343	45	27	42	25	36	51
Olfr1311	-0.815968	0.198259	0.355364	13.5769	15.8001	11.3536	19	13	11	10	5	23
Olfr114	-1.44743	0.200217	0.358284	2.97172	4.47599	1.46744	5	9	0	1	2	2
Olfr498	-1.1885	0.203109	0.362862	4.16127	5.72627	2.59627	11	8	0	5	3	1
Olfr228	-0.93605	0.206358	0.368061	12.4315	17.8457	7.01721	11	4	24	7	9	8
Olfr970	-0.669228	0.207584	0.368268	20.3628	24.1804	16.5451	28	14	21	11	18	27
Olfr796	-0.401955	0.207634	0.368268	75.6145	84.1552	67.0739	90	61	69	81	70	78
Olfr646	-0.961885	0.207818	0.368268	7.15764	9.36058	4.95469	18	5	5	5	7	5
Olfr551	-1.09357	0.207828	0.368268	4.24067	5.84235	2.63898	4	4	6	4	2	3
Olfr1480	1.02606	0.208434	0.368727	7.10694	4.2541	9.95977	7	2	3	6	15	13
Olfr1044	-0.520122	0.208765	0.368727	34.0962	39.2633	28.9291	58	23	28	39	30	30
Olfr867	-0.874282	0.209224	0.368939	8.25993	10.3104	6.20946	11	5	10	10	2	9
Olfr1425	0.581047	0.2103	0.370107	24.512	18.7292	30.2947	19	23	10	39	37	28
Olfr1295	-0.514233	0.210567	0.370107	34.9428	39.1439	30.7418	54	37	21	47	25	33
Olfr279	-0.422403	0.211348	0.370881	82.6792	91.7234	73.6351	88	110	53	86	74	91
Olfr829	-1.22225	0.217985	0.381913	2.76188	3.77356	1.7502	6	3	2	1	3	2
Olfr213	-0.390066	0.218926	0.382945	75.8593	83.5554	68.1631	70	81	65	59	80	93
Olfr166	-0.330432	0.222605	0.388754	180.6	196.321	164.879	214	144	158	185	184	194
Olfr273	-0.44534	0.224018	0.390596	48.1984	53.5167	42.88	42	47	46	31	43	71
Olfr1066	-1.11261	0.226217	0.393799	4.2699	5.5644	2.9754	9	1	5	5	0	5
Olfr1145	-1.93692	0.227634	0.395002	0.174615	0.34923	0	0	1	0	0	0	0
Olfr631	-1.93692	0.227634	0.395002	0.174615	0.34923	0	0	1	0	0	0	0
Olfr734	-0.782332	0.228442	0.395772	12.8439	15.053	10.6348	17	14	10	4	14	18
Olfr1209	0.645262	0.229316	0.396655	24.813	18.492	31.1341	28	9	14	23	40	43
Olfr530	0.422613	0.229962	0.397141	71.9254	61.4793	82.3715	54	30	65	64	85	130
Olfr1254	-0.55387	0.231905	0.399531	23.3942	27.1395	19.6488	26	24	21	23	20	24
Olfr488	-0.435948	0.232313	0.399531	54.8766	61.2018	48.5513	77	31	53	46	38	80
Olfr684	-0.656	0.232978	0.399531	15.4368	18.3274	12.5462	18	21	11	18	13	12
Olfr617	-0.689413	0.23298	0.399531	16.3924	19.5023	13.2825	35	13	10	14	11	20
Olfr134	0.782969	0.233182	0.399531	10.2264	6.98394	13.4689	12	6	3	14	16	16
Olfr787	-0.633466	0.234273	0.400769	19.2835	23.6546	14.9123	21	13	24	15	19	17
Olfr816	-0.545202	0.234738	0.4008	27.0379	31.8362	22.2396	38	17	28	27	24	25
Olfr699	-0.731038	0.235028	0.4008	10.6525	12.7776	8.52737	14	13	8	7	10	12
Olfr1062	1.23516	0.237144	0.403776	3.98517	2.48191	5.48843	8	1	0	8	8	3
Olfr995	-1.18436	0.241205	0.410048	6.43234	7.43447	5.43021	15	5	3	5	0	13
Olfr1346	-0.426434	0.243517	0.411966	71.1182	78.5129	63.7235	132	66	36	80	57	80
Olfr127	-0.519396	0.243961	0.411966	25.4619	29.0096	21.9141	32	28	19	28	24	23
Olfr239	-0.382896	0.24408	0.411966	73.0403	79.5304	66.5503	86	75	54	91	84	54
Olfr395	-1.42231	0.244107	0.411966	2.34782	3.51095	1.18469	4	7	0	1	1	2
Olfr1396	-0.364898	0.244226	0.411966	96.2436	104.384	88.1034	103	109	69	88	96	116
Olfr733	-0.437659	0.246362	0.41369	50.55	57.3496	43.7503	71	31	49	45	47	57
Olfr340	-1.84601	0.246389	0.41369	0.133292	0.266585	0	1	0	0	0	0	0
Olfr384	-1.84601	0.246389	0.41369	0.133292	0.266585	0	1	0	0	0	0	0
Olfr591	-0.627363	0.247241	0.413912	18.4084	21.5977	15.2191	35	19	10	15	19	18
Olfr1123	-0.574859	0.247282	0.413912	28.3109	32.2352	24.3865	46	33	15	18	31	34
Olfr112	0.422341	0.248451	0.41523	45.854	37.7545	53.9534	34	37	28	57	60	67
Olfr466	-0.541869	0.250159	0.417443	23.2726	26.8876	19.6576	30	17	23	29	15	23
Olfr1196	-0.361393	0.252621	0.420797	94.425	101.627	87.2232	108	86	76	103	70	123
Olfr1253	-0.536898	0.252942	0.420797	23.2072	26.873	19.5415	25	24	21	21	26	20
Olfr1390	-1.09713	0.254314	0.422433	3.7265	4.85126	2.60174	4	6	3	6	2	1
Olfr1228	-0.323493	0.256847	0.425414	150.642	159.982	141.302	176	177	91	212	161	113
Olfr826	-0.683048	0.256891	0.425414	10.7482	12.969	8.52737	11	11	11	7	10	12
Olfr151	1.73877	0.257935	0.426495	0.845656	0.266585	1.42473	1	0	0	2	3	0
Olfr714	-0.698218	0.259083	0.427742	13.8982	16.9939	10.8026	10	12	18	5	19	13
Olfr450	-0.662862	0.261546	0.431154	13.1983	15.5075	10.8891	19	17	8	12	10	15
Olfr102	-0.740959	0.263872	0.434331	15.6427	19.423	11.8624	32	7	15	14	19	8
Olfr512	-0.847881	0.26487	0.435316	9.05421	10.6562	7.45221	15	11	5	4	6	15
Olfr292	-0.577049	0.265285	0.43534	20.0155	22.5775	17.4536	26	19	16	22	10	27
Olfr700	-1.35974	0.268203	0.439465	1.4453	2.03138	0.859215	5	2	0	2	1	0
Olfr884	-0.45625	0.270668	0.442837	32.9121	36.6133	29.2108	44	39	20	30	38	32
Olfr1509	-0.401147	0.272604	0.445335	66.4347	72.6714	60.1979	86	86	35	69	59	77
Olfr351	-0.70586	0.273802	0.446621	10.1181	12.0265	8.20958	13	10	9	5	12	11
Olfr358	-0.545694	0.275698	0.449041	27.9919	31.1383	24.8456	41	24	21	15	27	42
Olfr1443	-0.344691	0.2784	0.452461	187.123	207.51	166.736	143	98	240	83	173	306
Olfr394	-0.600241	0.278629	0.452461	20.3723	23.088	17.6565	25	18	18	35	17	9
Olfr1419	-0.604266	0.279199	0.452696	13.9653	16.2546	11.676	21	16	9	14	14	12
Olfr1028	-0.59707	0.279606	0.452696	19.4994	23.2645	15.7342	47	13	11	19	20	15
Olfr641	-0.91237	0.280078	0.452785	7.72037	10.1496	5.29111	15	16	1	6	5	7
Olfr354	-0.580966	0.280762	0.453217	18.7441	21.5938	15.8943	21	20	16	23	23	9
Olfr49	-0.430701	0.282125	0.454592	45.0327	49.5076	40.5579	54	57	27	52	34	52
Olfr651	-0.604213	0.282943	0.454592	14.6768	17.0617	12.2919	19	15	12	10	17	15
Olfr172	-1.19007	0.283245	0.454592	2.15794	2.89116	1.42473	4	2	2	2	3	0
Olfr397	-0.326482	0.283284	0.454592	119.092	127.194	110.989	136	133	79	112	121	145
Olfr1229	0.410606	0.284206	0.454823	64.2816	55.1549	73.4084	32	69	40	93	78	80
Olfr346	-0.456485	0.284264	0.454823	37.1126	42.0534	32.1718	29	37	38	40	22	47
Olfr1265	0.560853	0.284722	0.454887	22.685	18.0188	27.3511	22	9	16	31	38	25
Olfr1440	-0.427177	0.28595	0.456178	44.5745	48.4333	40.7156	52	49	31	50	29	59
Olfr722	-0.466966	0.286888	0.456773	34.6499	38.7235	30.5762	34	43	26	42	23	39
Olfr1446	0.626782	0.287372	0.456773	16.4001	12.8982	19.902	9	22	5	22	23	23
Olfr652	-0.509555	0.287583	0.456773	25.169	28.8776	21.4603	43	16	21	22	22	29
Olfr803	-0.943875	0.288674	0.457839	5.60362	6.9013	4.30595	13	5	3	3	10	2
Olfr776	-0.383085	0.292208	0.462141	45.8487	49.6201	42.0772	66	53	24	56	57	32
Olfr452	-0.40625	0.292236	0.462141	38.7474	42.5423	34.9525	46	48	24	37	49	34
Olfr694	-0.490234	0.293729	0.463828	23.6486	26.775	20.5222	33	16	22	32	15	23
Olfr2	-1.13095	0.299011	0.471484	2.58365	3.45434	1.71296	4	2	3	3	3	0
Olfr69	-0.460275	0.30062	0.472524	28.6453	32.092	25.1986	48	23	20	29	27	30
Olfr108	1.7599	0.301216	0.472524	0.144115	0	0.288229	0	0	0	1	0	0
Olfr153	1.7599	0.301216	0.472524	0.144115	0	0.288229	0	0	0	1	0	0
Olfr1427	0.215638	0.301408	0.472524	576.13	519.868	632.391	370	495	441	520	720	909
Olfr1049	0.799866	0.302506	0.473564	8.53089	5.38046	11.6813	7	2	5	5	8	26
Olfr914	-0.820228	0.304424	0.475049	6.19876	7.73106	4.66646	14	5	4	4	7	5
Olfr169	0.329663	0.305015	0.475049	136.087	115.849	156.326	170	131	44	168	221	148
Olfr645	-0.526782	0.305046	0.475049	19.0488	21.6237	16.4739	34	15	13	20	14	22
Olfr820	-0.379707	0.305202	0.475049	76.1367	85.7276	66.5458	91	47	80	67	90	71
Olfr449	0.279789	0.307732	0.478259	391.234	331.559	450.91	389	288	226	334	640	566
Olfr1279	-1.1758	0.308271	0.478259	4.15693	5.41842	2.89544	3	10	2	8	1	1
Olfr1137	0.952383	0.308583	0.478259	7.14264	4.22806	10.0572	8	6	0	15	4	15
Olfr356	-1.1618	0.310306	0.480246	2.45061	3.4283	1.47292	5	6	0	2	1	2
Olfr1143	-0.631629	0.311368	0.481205	13.5164	15.4096	11.6232	12	14	13	12	5	22
Olfr1472	-0.859082	0.314531	0.485246	4.46761	5.67706	3.25816	6	2	6	5	1	5
Olfr447	-0.598792	0.315257	0.485246	15.9567	18.2254	13.688	27	9	14	10	10	26
Olfr285	-0.300343	0.315321	0.485246	184.591	207.3	161.883	157	98	233	122	166	260
Olfr771	-0.60673	0.316958	0.487076	11.0605	13.3482	8.77289	9	12	12	9	11	10
Olfr47	-0.598938	0.318738	0.489121	26.4358	29.0661	23.8055	47	28	12	14	20	46
Olfr657	-0.596043	0.320002	0.489372	10.9535	12.7737	9.1334	15	9	10	10	8	13
Olfr1256	-0.486256	0.320032	0.489372	30.7864	34.1879	27.3849	51	38	13	36	20	37
Olfr524	-0.278003	0.320761	0.489372	156.031	166.546	145.515	179	129	131	168	173	157
Olfr371	-0.959003	0.321185	0.489372	3.90949	4.81728	3.0017	7	2	4	1	2	7
Olfr592	-0.415142	0.321578	0.489372	45.2523	50.0016	40.503	69	26	40	32	39	66
Olfr1312	-0.564099	0.3216	0.489372	21.6712	24.7633	18.5791	38	29	8	21	15	27
Olfr1130	-0.741826	0.32273	0.490405	6.74475	8.1743	5.31521	7	10	5	6	4	8
Olfr845	1.18222	0.325236	0.493523	2.3006	1.14898	3.45221	3	1	0	2	8	2
Olfr491	0.31668	0.328117	0.497203	124.348	110.212	138.485	95	56	116	100	148	221
Olfr403	-0.522024	0.33026	0.499754	23.6011	26.8389	20.3633	43	15	18	15	22	32
Olfr1080	-0.438912	0.332889	0.503032	24.7016	27.7214	21.6818	30	21	22	24	24	26
Olfr284	-0.575076	0.334144	0.504229	12.6618	15.3344	9.98934	8	12	16	7	13	14
Olfr1202	-0.669094	0.339032	0.510896	13.4891	15.117	11.8613	12	18	10	27	9	5
Olfr1323	0.462264	0.341535	0.513956	22.9186	19.5658	26.2714	12	13	21	26	23	40
Olfr493	1.45425	0.344386	0.517195	0.7456	0.34923	1.14197	0	1	0	2	2	0
Olfr1129	0.644439	0.345009	0.517195	8.94225	6.39814	11.4864	9	5	4	9	13	17
Olfr365	-0.38251	0.345359	0.517195	71.5051	78.016	64.9942	117	47	54	65	105	54
Olfr314	-0.423481	0.345589	0.517195	37.9829	41.832	34.1337	34	39	34	60	27	30
Olfr1212	-0.420713	0.348914	0.520838	45.2402	51.4481	39.0324	29	51	46	58	29	46
Olfr1111	-0.516017	0.350257	0.520838	17.1397	18.8566	15.4228	21	17	13	17	9	26
Olfr19	-0.397785	0.350298	0.520838	39.5003	41.5467	37.454	44	37	30	30	27	69
Olfr507	0.951442	0.350526	0.520838	4.47717	3.09772	5.85662	9	2	0	6	7	7
Olfr1089	0.990951	0.350786	0.520838	2.53602	1.82482	3.24721	0	2	2	3	3	5
Olfr1414	-0.317342	0.350896	0.520838	62.29	66.3886	58.1914	97	58	36	74	62	63
Olfr720	-0.330739	0.354629	0.525662	75.6007	79.9811	71.2203	59	84	62	59	55	126
Olfr1225	-0.399125	0.357529	0.52924	39.4581	46.2017	32.7145	31	28	50	37	40	35
Olfr871	0.721477	0.358473	0.529917	6.51947	5.14389	7.89505	4	2	6	8	10	9
Olfr342	-0.410714	0.359183	0.530246	28.5946	32.0389	25.1502	29	18	32	19	24	42
Olfr1189	-0.459538	0.362362	0.534192	21.765	24.4697	19.0603	17	20	23	10	29	26
Olfr267	-0.449971	0.362908	0.534192	22.3408	24.3728	20.3087	31	30	10	37	20	13
Olfr866	-1.08081	0.363478	0.534192	3.12017	4.23148	2.00886	4	1	5	1	5	1
Olfr1431	-0.47236	0.364001	0.534192	18.6452	20.9819	16.3085	19	23	14	25	17	14
Olfr1453	1.48458	0.364311	0.534192	0.153425	0	0.306851	0	0	0	0	0	1
Olfr1261	-0.265423	0.365086	0.534608	116.408	122.304	110.512	130	101	93	137	96	143
Olfr1242	-0.36765	0.366195	0.535511	40.4086	43.4014	37.4158	57	34	29	33	39	55
Olfr46	0.28678	0.367496	0.536279	87.3955	74.9679	99.8231	68	66	60	78	114	147
Olfr919	-0.570567	0.367706	0.536279	14.514	15.9088	13.1192	17	10	14	5	12	27
Olfr1447	-0.416198	0.371178	0.540619	31.7967	35.8237	27.7697	44	19	31	25	38	32
Olfr1331	-0.608724	0.373679	0.542898	9.68477	10.9749	8.39466	14	3	11	8	2	18
Olfr913	-0.533433	0.373742	0.542898	19.8501	22.6596	17.0405	22	11	23	7	26	25
Olfr97	-0.39616	0.375174	0.543594	42.4259	45.6026	39.2493	62	51	20	36	37	60
Olfr965	-0.621801	0.37522	0.543594	7.65653	9.10139	6.21166	12	4	8	6	5	10
Olfr781	-0.491689	0.377019	0.545474	15.738	17.3922	14.0837	30	14	8	23	9	16
Olfr671	0.916114	0.381614	0.551347	5.17185	3.89748	6.44623	12	2	0	6	8	8
Olfr479	-0.321981	0.382092	0.551347	44.2366	47.6183	40.8549	41	47	36	37	46	56
Olfr1155	0.49761	0.385149	0.555022	13.2736	10.367	16.1802	11	10	7	18	15	22
Olfr1412	-0.302713	0.386733	0.556179	59.7381	63.4448	56.0315	92	55	35	63	71	58
Olfr1179	-0.731081	0.386974	0.556179	4.62329	5.50835	3.73824	12	5	1	7	5	1
Olfr855	-0.455537	0.38751	0.556215	18.2715	20.0055	16.5374	24	18	13	14	16	26
Olfr1441	-0.489454	0.38866	0.557131	14.4133	16.2432	12.5834	27	13	8	16	13	14
Olfr1016	-0.534578	0.389665	0.557837	13.1615	14.4598	11.8633	19	14	8	13	7	20
Olfr1055	-1.37094	0.390606	0.558448	0.543992	0.799754	0.288229	3	0	0	1	0	0
Olfr1336	-0.316782	0.391269	0.558663	46.4486	49.2443	43.6528	64	47	28	58	41	50
Olfr1314	-0.911306	0.397656	0.567038	3.30184	3.90884	2.69485	6	5	1	1	2	6
Olfr469	-0.51131	0.399768	0.568591	14.0812	16.4086	11.7538	10	20	12	15	10	15
Olfr1098	-0.623418	0.39979	0.568591	9.83015	12.1126	7.54768	8	6	14	5	14	7
Olfr794	-0.410703	0.400377	0.568682	23.7709	26.727	20.8149	19	33	18	25	21	25
Olfr60	0.243138	0.403255	0.572023	162.613	140.867	184.359	178	103	102	189	162	274
Olfr850	-1.28547	0.404677	0.573292	0.597584	0.912412	0.282756	0	1	1	0	1	0
Olfr1170	-0.40076	0.407418	0.576424	25.837	28.9863	22.6878	41	13	24	22	22	33
Olfr847	-0.423941	0.409874	0.579113	21.9266	24.9275	18.9256	30	13	22	25	23	17
Olfr54	0.332767	0.410383	0.579113	44.2578	37.0972	51.4185	56	28	22	50	56	69
Olfr1417	-0.278918	0.412671	0.581588	69.3126	72.8051	65.82	77	61	55	53	80	91
Olfr1211	-0.388246	0.413514	0.582022	27.0309	29.5615	24.5004	23	30	23	30	17	36
Olfr629	-0.301456	0.416227	0.585084	52.9735	59.7145	46.2325	50	28	65	50	42	65
Olfr1504	0.946867	0.418475	0.587485	2.99189	1.49821	4.48556	3	2	0	5	1	9
Olfr1359	-0.405087	0.419366	0.587977	42.5312	44.4236	40.6387	61	50	19	48	21	68
Olfr130	-0.691604	0.419969	0.588064	7.8553	9.39799	6.31261	11	4	9	8	12	2
Olfr825	0.53974	0.421451	0.589382	7.93955	6.16157	9.71753	6	5	5	9	10	14
Olfr743	-0.209588	0.424827	0.593339	707.197	828.146	586.249	427	336	1060	572	519	895
Olfr8	0.405652	0.425867	0.594029	29.6103	22.0296	37.191	19	26	14	16	36	73
Olfr398	-0.27147	0.426713	0.594448	70.65	75.1137	66.1862	89	52	59	65	81	80
Olfr1181	1.13163	0.427849	0.595006	1.5217	1.04769	1.99571	0	3	0	3	4	0
Olfr967	-1.2396	0.428207	0.595006	0.541255	0.799754	0.282756	3	0	0	0	1	0
Olfr1338	-0.454382	0.431758	0.598867	16.1087	16.9339	15.2836	14	12	16	8	9	34
Olfr935	-0.457588	0.432087	0.598867	12.3426	14.0953	10.5899	11	11	13	9	12	15
Olfr1290	0.380793	0.432866	0.599174	20.3729	17.0091	23.7366	18	14	13	29	24	28
Olfr1410	-0.467945	0.43341	0.599174	24.4462	26.4257	22.4667	33	15	22	18	47	13
Olfr295	-0.512915	0.434287	0.599302	10.2797	11.3055	9.25387	10	7	11	10	3	18
Olfr1506	1.70611	0.434604	0.599302	8.32813	9.01091	7.64536	0	0	16	2	25	0
Olfr648	-0.557838	0.43695	0.60159	8.22238	9.49983	6.94493	17	11	2	7	12	5
Olfr873	-0.335142	0.437369	0.60159	30.3784	33.4771	27.2797	36	20	30	30	29	34
Olfr319	-0.319366	0.438061	0.60178	36.8168	40.3558	33.2778	46	24	35	41	39	34
Olfr1099	-0.381176	0.440946	0.604981	26.2811	28.5329	24.0292	45	28	12	22	30	30
Olfr790	-0.525571	0.451926	0.618618	8.86743	10.0744	7.66048	11	14	4	8	7	11
Olfr948	-0.62297	0.452023	0.618618	11.8245	16.1035	7.54548	10	3	22	9	11	6
Olfr1223	-0.567638	0.459854	0.627996	5.72299	6.45077	4.99521	10	6	3	8	3	6
Olfr385	-0.767329	0.460307	0.627996	3.80563	4.67858	2.93268	11	5	0	6	1	3
Olfr1135	-0.527189	0.460608	0.627996	8.70691	9.42458	7.98923	13	9	5	12	3	12
Olfr1213	-0.320782	0.463663	0.631372	32.3829	33.065	31.7008	47	33	16	64	23	22
Olfr382	1.03025	0.46556	0.633161	1.41821	0.829767	2.00666	1	0	1	5	2	0
Olfr894	-0.89704	0.466558	0.633727	2.4922	3.21777	1.76662	1	2	4	4	0	2
Olfr963	-0.67741	0.469038	0.636302	8.28212	10.0216	6.54261	25	8	1	6	4	12
Olfr1282	-1.74965	0.471726	0.639151	1.4124	1.9601	0.864688	0	4	1	3	0	0
Olfr286	-0.313886	0.474142	0.641625	29.7809	31.0557	28.5062	42	23	21	53	24	21
Olfr311	-1.10258	0.475572	0.642761	0.452022	0.615815	0.288229	1	1	0	1	0	0
Olfr417	-0.325156	0.480019	0.647966	24.4607	25.9718	22.9497	34	21	17	27	20	31
Olfr916	-0.397282	0.483332	0.651451	15.8173	17.347	14.2876	24	12	12	13	21	15
Olfr872	-0.704839	0.483798	0.651451	4.14039	4.50203	3.77875	4	5	3	10	1	2
Olfr1214	0.318515	0.484647	0.651788	27.1915	24.4731	29.9098	13	15	28	18	31	52
Olfr243	-0.501187	0.486439	0.652398	9.93259	10.2617	9.60344	9	8	9	9	2	21
Olfr401	-0.490062	0.487574	0.652398	15.0636	18.094	12.0332	41	6	9	10	15	16
Olfr1199	-0.444534	0.487769	0.652398	10.0872	11.0355	9.13887	13	12	6	11	7	13
Olfr1006	-0.376936	0.48884	0.652398	25.8629	27.2221	24.5037	40	20	17	13	30	40
Olfr1138	-0.6908	0.489115	0.652398	4.62545	4.76862	4.48229	5	5	3	0	5	10
Olfr1168	-0.409509	0.489125	0.652398	13.4511	15.2743	11.6278	12	12	14	14	16	10
Olfr917	0.937159	0.489299	0.652398	2.28581	1.14898	3.42264	3	1	0	1	10	1
Olfr854	1.06207	0.492728	0.655759	0.560163	0.266585	0.853741	1	0	0	1	2	0
Olfr905	-0.828068	0.493024	0.655759	4.12395	5.2944	2.95351	12	6	0	1	4	5
Olfr1152	-0.488959	0.496031	0.658953	7.01995	7.95638	6.08351	8	7	6	9	8	4
Olfr1219	0.232498	0.496786	0.65915	93.4477	81.5572	105.338	89	64	63	80	151	129
Olfr1272	-0.447774	0.497982	0.659932	9.77318	10.7275	8.81888	20	9	4	13	6	11
Olfr859	-0.317705	0.499518	0.661162	23.4903	24.8528	22.1277	29	20	18	23	19	33
Olfr1046	0.29334	0.500932	0.661879	38.4508	32.9706	43.9309	21	30	30	46	26	76
Olfr1433	0.542396	0.501276	0.661879	8.90597	6.3081	11.5038	15	5	1	21	3	15
Olfr853	1.55163	0.502129	0.662202	0.993954	0.563182	1.42473	0	0	1	2	3	0
Olfr299	-0.336483	0.503496	0.662965	19.4778	21.0679	17.8877	29	14	15	20	19	22
Olfr293	-0.326622	0.503926	0.662965	26.3214	27.8488	24.7939	17	20	29	22	11	50
Olfr1183	-0.344597	0.507869	0.666875	24.9739	27.054	22.8938	34	37	9	30	20	28
Olfr600	-0.388298	0.508125	0.666875	14.822	16.3932	13.2508	32	8	9	17	10	18
Olfr923	-0.211866	0.509686	0.667841	92.1697	100.044	84.2949	67	66	105	89	75	122
Olfr1141	-0.775648	0.510504	0.667841	1.20303	1.52823	0.877836	1	2	1	1	1	1
Olfr224	-0.214738	0.510702	0.667841	94.585	97.4182	91.7518	140	85	54	105	97	111
Olfr113	-0.559574	0.51154	0.668134	4.48707	4.86991	4.10422	8	3	3	9	1	4
Olfr194	0.42233	0.516415	0.673692	11.5117	9.32671	13.6967	6	6	10	16	5	25
Olfr1239	-0.484303	0.517938	0.674768	8.43948	9.62717	7.25178	19	5	5	7	12	6
Olfr1286	-0.419966	0.51848	0.674768	9.95427	10.8628	9.04577	20	11	3	16	7	8
Olfr378	-0.377538	0.519318	0.675052	12.7078	13.5774	11.8383	17	13	8	14	20	7
Olfr1195	-0.4176	0.522515	0.678396	8.72272	9.53724	7.9082	10	10	6	6	11	10
Olfr25	-0.389501	0.524053	0.679582	12.0829	13.6635	10.5023	12	9	13	15	11	10
Olfr91	-0.278427	0.526407	0.681613	35.3515	36.1323	34.5708	40	31	26	21	39	57
Olfr1015	0.272901	0.526872	0.681613	43.4359	36.4627	50.4091	51	30	22	37	57	77
Olfr1382	-0.219664	0.528605	0.683043	57.6025	60.6094	54.5956	52	50	52	71	48	67
Olfr357	0.258307	0.529679	0.683619	44.009	39.038	48.9801	64	21	26	53	53	61
Olfr235	0.324888	0.53201	0.685814	19.7338	16.7205	22.7471	17	22	8	34	23	21
Olfr1484	0.20567	0.534031	0.687605	113.06	108.131	117.989	85	48	122	96	123	181
Olfr765	-0.816697	0.537332	0.691037	4.18024	5.04646	3.31402	15	3	0	2	1	8
Olfr318	-0.227603	0.540171	0.693485	44.5869	46.1126	43.0612	58	41	29	50	59	39
Olfr1437	-0.291836	0.54051	0.693485	23.9784	26.4745	21.4822	20	17	27	26	18	29
Olfr981	-0.414865	0.541428	0.693491	11.8181	13.2094	10.4267	28	10	4	10	18	8
Olfr1475	-0.951712	0.54179	0.693491	0.42001	0.533169	0.306851	2	0	0	0	0	1
Olfr707	-0.348519	0.54255	0.693649	32.1992	34.6634	29.7349	47	15	30	28	56	19
Olfr972	0.270448	0.54493	0.695873	29.4296	24.8528	34.0063	29	20	18	30	30	55
Olfr775	-0.420542	0.548123	0.69913	10.4733	12.4805	8.46604	12	4	14	9	11	9
Olfr58	-0.637567	0.554476	0.706405	5.48484	5.84632	5.12336	3	8	4	5	0	12
Olfr1306	-0.501369	0.555919	0.707415	4.49147	5.19652	3.78643	5	3	5	7	3	3
Olfr61	0.196385	0.558401	0.709743	64.5527	57.332	71.7734	73	52	35	79	93	74
Olfr1496	-0.290779	0.559381	0.710159	19.2303	20.1861	18.2746	30	22	8	27	23	13
Olfr1388	-0.225354	0.574523	0.728533	40.3283	41.9639	38.6927	38	46	28	52	35	45
Olfr250	0.232407	0.576038	0.729603	44.306	39.1432	49.4688	66	23	24	51	47	70
Olfr583	0.8772	0.577799	0.730983	2.61186	0.965045	4.25867	1	2	0	2	0	12
Olfr1252	-0.222278	0.579158	0.731632	33.9038	35.2499	32.5577	38	30	26	38	33	40
Olfr814	-0.34311	0.579657	0.731632	10.6319	11.1968	10.0671	12	10	8	8	9	17
Olfr984	-0.309097	0.582484	0.734107	22.3987	23.8696	20.9279	42	25	7	16	36	20
Olfr1351	-0.504689	0.582967	0.734107	5.73828	6.36416	5.11241	12	1	5	3	2	12
Olfr76	-0.313915	0.587898	0.738692	24.6217	26.6148	22.6286	40	36	6	20	26	31
Olfr341	-0.363234	0.587966	0.738692	18.6012	21.406	15.7965	5	22	22	16	7	30
Olfr402	-0.5802	0.589009	0.739149	4.86102	5.00519	4.71685	8	5	2	0	8	8
Olfr1241	0.233259	0.590727	0.74045	31.3802	27.4848	35.2755	27	21	23	52	24	44
Olfr1030	-0.254342	0.592039	0.74124	42.1773	43.7024	40.6521	73	42	17	34	44	60
Olfr329	-0.168032	0.592937	0.741512	79.4638	80.9527	77.9749	97	61	60	104	71	91
Olfr1461	0.37024	0.594211	0.741521	21.5507	20.8495	22.2518	12	7	27	26	37	14
Olfr3	-0.257279	0.594307	0.741521	28.9485	29.8699	28.0271	34	37	14	28	25	42
Olfr1043	0.269858	0.596903	0.74349	25.4299	21.6689	29.1909	40	17	9	34	23	42
Olfr1161	0.467326	0.597252	0.74349	4.30324	3.32304	5.28344	3	4	2	9	3	6
Olfr608	-0.308927	0.598157	0.743766	16.4943	17.0057	15.9829	22	19	8	16	12	26
Olfr904	-0.529789	0.603774	0.749893	3.45457	3.60827	3.30087	8	1	2	4	0	7
Olfr99	-0.155065	0.605061	0.750528	103.17	104.751	101.589	104	98	76	105	109	132
Olfr1184	0.215013	0.606125	0.750528	31.9152	28.0146	35.8158	33	26	18	43	34	45
Olfr649	-0.305025	0.606355	0.750528	14.3622	15.2521	13.4722	27	15	5	19	12	15
Olfr1322	-0.238047	0.60852	0.752352	30.1036	31.518	28.6891	57	29	11	38	28	32
Olfr305	0.344457	0.609438	0.752632	11.4518	9.34591	13.5576	13	12	3	17	10	19
Olfr1193	-0.18106	0.610241	0.752769	65.3532	66.3067	64.3997	71	76	37	65	66	88
Olfr1251	-0.190008	0.617144	0.760422	44.2407	45.6582	42.8232	41	43	35	57	38	51
Olfr513	0.552709	0.622828	0.766558	3.79699	2.83114	4.76284	8	2	0	4	3	9
Olfr324	-0.279677	0.623712	0.766778	13.2794	14.0959	12.4629	14	20	6	16	18	9
Olfr742	-0.112698	0.624568	0.766963	399.972	411.9	388.043	362	250	405	354	381	581
Olfr869	-0.29482	0.627207	0.76896	11.9013	12.9463	10.8562	8	10	13	6	16	15
Olfr1450	0.692784	0.62794	0.76896	4.14687	4.85469	3.43906	0	1	8	4	7	1
Olfr167	-0.158751	0.628314	0.76896	101.271	102.783	99.7592	136	76	71	115	139	89
Olfr355	-0.453854	0.632555	0.773281	4.50847	5.23051	3.78643	2	7	4	7	3	3
Olfr857	-0.260509	0.636387	0.777092	18.1035	18.9386	17.2683	17	9	20	9	15	34
Olfr961	-0.234258	0.641301	0.782215	29.1006	29.2088	28.9925	42	29	14	23	27	48
Olfr303	-0.21762	0.642602	0.78262	37.123	37.8262	36.4197	57	39	16	28	46	50
Olfr457	-0.271768	0.64328	0.78262	14.8154	16.7273	12.9034	9	12	18	14	14	16
Olfr206	0.268184	0.643791	0.78262	13.3982	11.4973	15.2991	10	14	7	12	18	22
Olfr1186	-0.388973	0.645604	0.782968	4.81085	5.0352	4.5865	6	5	3	7	8	1
Olfr1090	-0.305722	0.645991	0.782968	9.18962	10.2091	8.17013	8	7	10	11	9	8
Olfr470	0.418025	0.646237	0.782968	5.59265	4.8026	6.38269	2	9	2	12	6	4
Olfr90	-0.154292	0.649422	0.785952	56.5462	57.2835	55.809	56	60	38	52	76	63
Olfr1377	-0.160126	0.652781	0.788363	51.5969	53.2307	49.9631	64	31	45	60	45	65
Olfr1491	-0.194975	0.652863	0.788363	39.9438	40.1429	39.7447	52	43	20	32	45	58
Olfr952	-0.557951	0.655288	0.790414	2.29129	2.57592	2.00666	1	5	1	5	2	0
Olfr393	-0.165572	0.656484	0.79098	42.7701	44.0474	41.4929	41	40	34	47	50	45
Olfr731	0.532387	0.657978	0.791084	4.67347	2.72984	6.61709	5	4	0	2	4	16
Olfr107	0.187548	0.658701	0.791084	32.9005	28.4837	37.3172	40	22	18	59	23	45
Olfr616	0.268438	0.658752	0.791084	11.4888	9.89773	13.0799	19	9	3	21	14	10
Olfr575	-0.297134	0.659757	0.791417	12.712	12.9502	12.4737	22	9	7	8	11	23
Olfr248	0.75746	0.661538	0.79268	1.10688	1.04769	1.16607	0	3	0	2	1	1
Olfr368	-0.261691	0.664194	0.794986	15.732	16.1946	15.2695	25	16	7	11	20	21
Olfr517	-0.382755	0.665445	0.795609	4.44369	5.06919	3.81819	3	9	2	4	4	5
Olfr1393	-0.16908	0.667453	0.797134	35.9989	37.0521	34.9457	35	31	30	39	35	45
Olfr1418	-0.181386	0.671704	0.800704	32.2733	34.8362	29.7104	25	21	37	30	30	41
Olfr1366	-0.247285	0.671914	0.800704	22.4432	23.1553	21.7311	31	12	19	11	32	31
Olfr1156	-0.472775	0.672666	0.800723	1.92828	2.11403	1.74252	4	3	0	4	1	1
Olfr312	-0.3918	0.67977	0.808295	4.19124	4.58071	3.80177	4	2	5	1	7	5
Olfr730	-0.191009	0.683346	0.811576	29.6993	30.9692	28.4295	29	23	27	39	38	21
Olfr1053	0.643876	0.684021	0.811576	0.418785	0.266585	0.570985	1	0	0	1	1	0
Olfr1131	0.405941	0.687066	0.813943	4.51711	3.71354	5.32068	10	3	0	7	3	8
Olfr1278	-0.358457	0.687513	0.813943	11.7232	12.1506	11.2957	4	14	11	27	7	5
Olfr1347	-0.132061	0.688768	0.814543	93.8871	92.6045	95.1697	114	83	59	116	74	133
Olfr945	0.419431	0.69274	0.81835	2.05851	1.74218	2.37485	1	1	2	3	1	4
Olfr701	0.136299	0.694961	0.819252	54.2005	50.3476	58.0533	43	42	43	52	72	74
Olfr1276	0.254471	0.695448	0.819252	10.4508	9.49189	11.4097	19	3	6	17	10	12
Olfr325	-0.172785	0.695762	0.819252	38.0304	38.1868	37.874	51	43	17	31	47	51
Olfr1320	-0.18536	0.70491	0.828738	22.5434	22.7354	22.3513	29	22	13	21	24	31
Olfr732	-0.282733	0.705341	0.828738	6.6443	6.69871	6.58989	7	9	3	7	14	2
Olfr815	-0.254444	0.706289	0.828956	12.2769	14.0274	10.5264	17	3	15	15	10	11
Olfr1247	-0.147649	0.708211	0.830316	38.0897	38.141	38.0383	42	32	28	39	34	56
Olfr1307	-0.199267	0.712222	0.833331	15.8662	16.2886	15.4438	18	20	8	22	17	14
Olfr251	0.191606	0.712314	0.833331	21.7815	19.5097	24.0533	30	12	13	22	29	31
Olfr1000	0.409571	0.714078	0.833647	3.99447	2.91378	5.07517	7	3	0	5	2	10
Olfr192	-0.208222	0.714732	0.833647	14.8209	15.1208	14.5211	26	17	4	26	14	10
Olfr632	0.314676	0.714883	0.833647	18.3852	17.9819	18.7885	47	14	1	12	26	26
Olfr1275	0.282415	0.716745	0.834923	8.32857	7.58508	9.07206	8	14	1	12	9	10
Olfr915	-0.397967	0.719638	0.837397	2.52346	2.32798	2.71894	4	2	1	1	1	7
Olfr1012	0.146524	0.725419	0.842875	39.1887	36.9275	41.45	41	18	35	38	46	57
Olfr1245	0.310583	0.726363	0.842875	4.32959	3.70228	4.95689	1	5	3	1	10	6
Olfr149	-0.192109	0.72667	0.842875	16.5854	16.7351	16.4356	22	15	10	13	21	22
Olfr51	-0.281171	0.733195	0.849538	4.63937	4.81728	4.46146	7	2	4	5	2	8
Olfr310	-0.415949	0.734691	0.850366	3.9832	4.06277	3.90363	10	4	0	2	2	9
Olfr906	-0.417428	0.736541	0.851601	2.5176	2.6472	2.38799	6	3	0	1	2	5
Olfr1206	0.167567	0.738771	0.852221	20.051	18.2787	21.8232	16	24	10	29	27	19
Olfr98	0.470184	0.739397	0.852221	1.24827	1.06634	1.4302	4	0	0	3	2	0
Olfr221	-0.17016	0.739427	0.852221	21.0439	21.4097	20.678	34	16	12	22	29	20
Olfr1029	0.213896	0.748169	0.861094	12.1436	11.216	13.0712	19	16	1	15	19	11
Olfr1355	0.30697	0.748708	0.861094	5.04608	5.04657	5.0456	0	8	4	4	4	9
Olfr1182	0.199998	0.750531	0.862278	17.4175	15.3801	19.4548	17	23	5	26	13	27
Olfr159	-0.460379	0.751849	0.862881	0.656081	0.69846	0.613701	0	2	0	0	0	2
Olfr1467	-0.179167	0.752662	0.862904	17.3561	16.9265	17.7857	19	13	13	9	19	32
Olfr1086	-0.252475	0.754968	0.864637	7.16951	8.19637	6.14265	7	2	10	11	4	6
Olfr1058	0.256515	0.75932	0.868076	6.39239	5.40705	7.37773	9	7	1	8	6	11
Olfr313	-0.16669	0.759566	0.868076	18.2517	18.1434	18.3599	16	22	11	15	16	31
Olfr204	-0.144314	0.761298	0.869142	24.8557	25.8366	23.8748	19	24	22	29	31	22
Olfr555	0.409438	0.763623	0.870882	1.35488	0.965045	1.74473	1	2	0	0	4	2
Olfr1002	-0.243438	0.766036	0.872719	10.5147	11.3173	9.71206	22	14	1	8	11	14
Olfr586	0.159114	0.771754	0.878206	21.5908	20.0915	23.0901	34	9	14	23	30	26
Olfr576	0.258158	0.773009	0.878206	3.59572	3.12773	4.06371	7	2	1	6	5	3
Olfr380	0.117524	0.773273	0.878206	36.8088	35.246	38.3716	24	31	32	45	41	45
Olfr706	0.113912	0.776111	0.878901	39.2639	35.813	42.7147	38	30	27	68	34	44
Olfr497	0.295635	0.77633	0.878901	3.07653	2.6472	3.50587	6	3	0	3	5	4
Olfr347	0.244652	0.776871	0.878901	3.62004	3.15775	4.08233	5	2	2	5	5	4
Olfr486	-0.318665	0.777116	0.878901	1.86447	1.97875	1.7502	4	1	1	1	3	2
Olfr686	0.161305	0.781832	0.883316	16.6105	14.2758	18.9451	17	15	8	23	11	30
Olfr1218	-0.175601	0.783291	0.883855	14.5855	16.5054	12.6656	11	5	21	9	15	19
Olfr315	-0.0869704	0.785151	0.883855	96.5116	94.7556	98.2677	78	86	78	85	84	163
Olfr519	-0.376392	0.785524	0.883855	0.602711	0.615815	0.589607	1	1	0	0	1	1
Olfr1095	-0.245078	0.785559	0.883855	4.86008	4.63731	5.08284	4	7	2	2	4	11
Olfr330	-0.0875356	0.787632	0.884906	80.585	79.2868	81.8831	106	80	41	108	84	88
Olfr73	-0.132937	0.789177	0.884906	29.0195	28.4317	29.6073	27	35	16	32	20	48
Olfr435	0.145271	0.789371	0.884906	15.2824	13.8214	16.7435	15	12	10	22	14	21
Olfr843	-0.13607	0.789746	0.884906	21.5197	23.3808	19.6587	10	19	25	16	25	26
Olfr832	0.232969	0.792464	0.887038	4.81815	4.412	5.2243	10	5	0	7	7	4
Olfr902	-0.187139	0.802877	0.897713	5.69014	5.78233	5.59796	8	4	4	6	5	8
Olfr1136	-0.333291	0.803652	0.897713	1.41479	1.6635	1.16607	1	4	0	2	1	1
Olfr659	-0.19526	0.804695	0.897957	9.50904	10.6561	8.36198	30	6	1	12	13	4
Olfr197	-0.189053	0.812626	0.905878	5.60675	5.62101	5.59249	9	6	2	5	6	8
Olfr1188	-0.243589	0.816215	0.908947	2.1055	2.19667	2.01433	3	4	0	2	4	1
Olfr1313	0.222556	0.819412	0.911575	4.05337	3.37567	4.73107	4	5	1	7	2	7
Olfr157	-0.115817	0.822549	0.91321	24.2527	23.6212	24.8843	27	18	18	20	47	19
Olfr66	0.160664	0.822832	0.91321	8.20843	7.59579	8.82108	14	3	5	9	9	12
Olfr352	-0.284049	0.8234	0.91321	3.89909	4.55864	3.23954	4	10	0	6	1	4
Olfr297	-0.131652	0.824255	0.913227	15.5249	15.8866	15.1633	32	13	5	18	19	15
Olfr1269	0.178329	0.826912	0.914704	6.03764	5.32441	6.75088	10	6	1	10	5	8
Olfr1197	-0.0751476	0.827269	0.914704	54.4553	54.2151	54.6954	57	44	42	64	62	61
Olfr1413	0.10618	0.828919	0.915452	21.6023	20.7228	22.4818	13	22	17	24	29	24
Olfr1226	0.0609357	0.829755	0.915452	151.25	144.503	157.998	128	129	116	192	184	165
Olfr638	-0.135196	0.83047	0.915452	9.34838	9.34194	9.35482	14	8	5	12	10	10
Olfr50	-0.386102	0.834363	0.918812	3.93857	5.03863	2.83851	2	0	8	2	8	0
Olfr392	-0.0731798	0.837291	0.921105	49.1912	48.3053	50.0772	62	41	31	60	53	58
Olfr353	-0.11787	0.846572	0.929888	17.1565	16.5778	17.7353	22	21	6	13	18	29
Olfr654	-0.0925244	0.846985	0.929888	27.0596	26.4943	27.6249	30	32	13	37	22	35
Olfr1329	-0.169998	0.850501	0.932807	6.69558	6.97997	6.41119	13	2	5	4	11	7
Olfr1097	0.103777	0.852817	0.93379	22.3031	19.0331	25.5732	28	17	10	27	13	46
Olfr155	0.110805	0.853113	0.93379	19.3256	18.4106	20.2406	20	31	4	19	24	26
Olfr344	-0.774518	0.854656	0.934538	0.674547	1.06634	0.282756	4	0	0	0	1	0
Olfr142	-0.0640224	0.856676	0.935807	55.8127	54.4183	57.207	51	54	39	60	50	84
Olfr624	-0.160953	0.85842	0.936771	5.35806	6.00367	4.71245	3	2	8	8	2	6
Olfr538	-0.110765	0.859477	0.936985	16.7668	16.0746	17.459	18	21	7	23	9	27
Olfr750	-0.0696097	0.861646	0.938409	34.4408	33.9095	34.9721	38	31	23	45	42	33
Olfr275	0.162859	0.864637	0.940522	2.37673	2.14404	2.60941	2	3	1	3	4	2
Olfr1178	0.0914967	0.865315	0.940522	17.0079	15.9353	18.0806	34	10	6	30	16	16
Olfr348	-0.132699	0.86699	0.941402	9.91179	9.57122	10.2523	7	14	5	21	4	10
Olfr484	0.183461	0.868697	0.942316	3.60863	3.07907	4.13819	5	5	0	2	5	7
Olfr389	-0.0663744	0.870557	0.943393	35.5072	34.7615	36.2529	24	28	33	26	29	67
Olfr1255	0.0820695	0.87265	0.943891	25.7457	24.811	26.6803	19	13	27	15	40	36
Olfr1045	-0.0513834	0.872752	0.943891	73.324	72.0574	74.5905	72	53	61	78	66	109
Olfr1204	0.090146	0.874364	0.944695	15.1617	14.8238	15.4997	9	13	14	19	17	17
Olfr1505	0.0774982	0.877184	0.946755	18.8538	17.4823	20.2253	24	14	11	25	20	24
Olfr868	-0.0709138	0.878498	0.946755	23.4879	23.2533	23.7224	23	20	18	22	30	29
Olfr459	-0.089277	0.878881	0.946755	12.1656	12.2705	12.0606	11	9	11	15	10	16
Olfr1109	-0.161292	0.884035	0.950688	2.28796	2.4893	2.08662	3	0	3	2	1	4
Olfr427	-0.201209	0.88428	0.950688	2.26147	2.7859	1.73705	2	0	4	3	2	1
Olfr1120	0.12422	0.885407	0.950961	8.10432	7.35579	8.85285	15	8	1	6	10	14
Olfr1335	-0.110695	0.890787	0.955332	5.47871	4.92994	6.02749	4	3	5	2	3	15
Olfr968	0.0833544	0.892882	0.955332	14.5334	13.2021	15.8646	18	16	5	12	20	22
Olfr1301	-0.0442686	0.893366	0.955332	93.8824	89.7621	98.0026	97	83	62	85	95	152
Olfr623	-0.114777	0.893643	0.955332	7.17679	7.65636	6.69722	13	12	0	9	8	6
Olfr480	0.139361	0.894375	0.955332	2.53909	2.48191	2.59627	8	1	0	5	3	1
Olfr307	0.117528	0.894746	0.955332	7.3928	6.15418	8.63143	11	6	2	4	8	17
Olfr1019	0.048037	0.899329	0.959284	44.1192	41.2201	47.0184	47	37	28	43	53	64
Olfr835	0.0718496	0.900691	0.959796	14.4313	13.1942	15.6683	20	8	9	19	10	24
Olfr678	-0.069066	0.902544	0.960237	14.3054	14.0393	14.5714	14	15	9	22	15	13
Olfr536	-0.030785	0.90287	0.960237	1097.64	1040.06	1155.22	1238	1072	596	1207	955	1751
Olfr1031	0.0589552	0.905072	0.961639	21.3837	19.9229	22.8446	25	17	13	21	29	28
Olfr954	0.626838	0.907361	0.962205	0.840182	0.266585	1.41378	1	0	0	0	5	0
Olfr1454	0.0690702	0.907374	0.962205	16.3076	15.4169	17.1984	22	8	12	15	26	18
Olfr985	0.0698141	0.910125	0.964183	13.2377	12.0191	14.4563	18	11	6	13	14	22
Olfr521	-0.0751846	0.911738	0.964953	12.3464	12.4623	12.2306	26	11	3	12	18	12
Olfr126	0.0654287	0.915086	0.967554	21.0009	18.5153	23.4865	19	24	9	25	12	42
Olfr772	0.0489741	0.919713	0.970781	26.2658	23.8317	28.6999	31	22	14	30	21	46
Olfr1333	-0.0530451	0.920093	0.970781	28.4768	27.4592	29.4945	46	29	9	29	27	44
Olfr128	-0.0525411	0.920814	0.970781	17.9763	17.5202	18.4324	20	22	8	25	18	20
Olfr930	0.0554531	0.922092	0.971187	13.1242	12.4058	13.8426	11	11	10	13	14	20
Olfr777	0.0331594	0.9255	0.972403	61.1448	61.1347	61.1548	41	47	60	68	71	70
Olfr1200	0.0345042	0.926426	0.972403	52.9389	49.815	56.0628	44	51	36	62	45	83
Olfr1360	-0.253581	0.926609	0.972403	4.23085	5.06864	3.39307	0	0	9	0	12	0
Olfr160	0.0463852	0.926822	0.972403	20.026	18.6726	21.3793	19	18	13	16	30	27
Olfr510	-0.0537635	0.928881	0.97313	11.8229	11.4634	12.1824	13	10	8	12	20	10
Olfr74	-0.104104	0.930488	0.97313	2.90428	3.21777	2.59079	1	2	4	4	4	1
Olfr1259	-0.0360732	0.930623	0.97313	40.6309	38.5022	42.7595	39	45	22	31	48	66
Olfr152	0.0548271	0.932142	0.97313	10.6283	10.213	11.0437	22	6	4	15	14	9
Olfr951	-0.0605565	0.932914	0.97313	10.3855	10.2097	10.5614	11	16	3	17	7	12
Olfr1317	0.063789	0.933872	0.97313	10.2942	9.96901	10.6195	24	7	2	10	10	16
Olfr15	0.0196303	0.934175	0.97313	617.825	582.752	652.899	664	599	349	643	678	899
Olfr1040	-0.104152	0.934669	0.97313	1.69755	1.68215	1.71296	5	1	0	3	3	0
Olfr23	0.0568807	0.938911	0.976423	12.0077	10.6749	13.3406	19	8	5	7	14	24
Olfr679	-0.0500793	0.939835	0.976423	21.8355	23.4863	20.1848	60	15	4	22	24	23
Olfr921	0.0328325	0.94086	0.976423	36.3172	34.1982	38.4363	39	23	28	26	53	52
Olfr1180	0.0521095	0.941423	0.976423	6.61844	6.2142	7.02269	7	6	4	8	8	8
Olfr993	0.395674	0.948364	0.982686	0.788316	0.34923	1.2274	0	1	0	0	0	4
Olfr266	-0.0575652	0.951897	0.985409	3.66316	3.83359	3.49272	2	3	4	5	4	3
Olfr1354	0.0356306	0.959144	0.991967	20.5142	18.038	22.9903	29	15	9	8	33	37
Olfr849	0.0302473	0.960499	0.992425	19.5197	17.7568	21.2827	23	22	7	28	12	32
Olfr593	-0.0381295	0.962812	0.993871	2.62374	2.27535	2.97213	3	1	2	0	4	6
Olfr323	0.0252112	0.965318	0.995513	14.5611	13.7539	15.3683	24	13	5	17	24	12
Olfr622	-0.0192457	0.966679	0.995972	30.423	29.0621	31.7839	48	24	14	34	30	44
Olfr1465	-0.0290187	0.970685	0.998523	1.78694	1.49821	2.07567	3	2	0	0	3	4
Olfr298	0.0232739	0.971202	0.998523	8.39273	8.58356	8.2019	3	11	7	8	10	10
Olfr1495	0.0215368	0.971908	0.998523	11.8549	11.0541	12.6557	17	9	6	16	10	17
Olfr247	-0.0237374	0.974446	0.998692	5.95428	5.78233	6.12623	8	4	4	8	7	6
Olfr828	0.0405709	0.974746	0.998692	4.23366	3.70228	4.76504	1	5	3	0	6	10
Olfr1246	-0.0162419	0.974827	0.998692	26.5248	27.7995	25.25	27	9	31	34	21	31
Olfr190	-0.0114996	0.981744	1	21.1704	18.406	23.9347	18	18	13	20	10	50
Olfr836	-0.0196513	0.983599	1	0.965389	0.799754	1.13102	3	0	0	0	4	0
Olfr922	0.0173085	0.984096	1	5.79207	5.45572	6.12843	11	4	2	4	10	7
Olfr658	0.0107807	0.984589	1	18.5973	18.2186	18.976	35	19	4	21	24	20
Olfr1380	0.00164262	0.996489	1	73.9281	70.7381	77.118	58	97	38	54	107	102
Olfr1008	1.31169e-15	1	1	0	0	0	0	0	0	0	0	0
Olfr1061	1.31169e-15	1	1	0	0	0	0	0	0	0	0	0
Olfr1128	1.31169e-15	1	1	0	0	0	0	0	0	0	0	0
Olfr1230	1.31169e-15	1	1	0	0	0	0	0	0	0	0	0
Olfr1248	1.31169e-15	1	1	0	0	0	0	0	0	0	0	0
Olfr1367	1.31169e-15	1	1	0	0	0	0	0	0	0	0	0
Olfr1371	1.31169e-15	1	1	0	0	0	0	0	0	0	0	0
Olfr1373	1.31169e-15	1	1	0	0	0	0	0	0	0	0	0
Olfr176	1.31169e-15	1	1	0	0	0	0	0	0	0	0	0
Olfr26	1.31169e-15	1	1	0	0	0	0	0	0	0	0	0
Olfr331	1.31169e-15	1	1	0	0	0	0	0	0	0	0	0
Olfr503	1.31169e-15	1	1	0	0	0	0	0	0	0	0	0
Olfr504	1.31169e-15	1	1	0	0	0	0	0	0	0	0	0
Olfr514	1.31169e-15	1	1	0	0	0	0	0	0	0	0	0
Olfr663	1.31169e-15	1	1	0	0	0	0	0	0	0	0	0
Olfr761	1.31169e-15	1	1	0	0	0	0	0	0	0	0	0
Olfr773	1.31169e-15	1	1	0	0	0	0	0	0	0	0	0
Olfr834	1.31169e-15	1	1	0	0	0	0	0	0	0	0	0
Olfr883	1.31169e-15	1	1	0	0	0	0	0	0	0	0	0
Olfr891	1.31169e-15	1	1	0	0	0	0	0	0	0	0	0
Olfr926	1.31169e-15	1	1	0	0	0	0	0	0	0	0	0
