# Supplementary material for: Concentration-Dependent Recruitment of Mammalian Odorant Receptors
Source: eNeuro. 2020 Apr 15;7(2):ENEURO.0103-19.2019. doi: 10.1523/ENEURO.0103-19.2019 (PMC7189481; doi:10.1523/ENEURO.0103-19.2019)
Supplement: Extended Data Figure 2-12. — TMT responsive ORs across each odorant concentration. Download Figure 2-12, XLSX file. [file enu-eN-NWR-0103-19-s19.xlsx]

## Sheet: Table TMT ORs Summary
	0.01% TMT													0.1% TMT													1% TMT													100% TMT
	EdgeR DE analysis						Read counts							EdgeR DE analysis						Read counts							EdgeR DE analysis						Read counts							EdgeR DE analysis						Read counts
id	logFoldChange	PValueRaw	PValueFDRadjusted	baseMean	baseMeanA	baseMeanB	No1	No2	No3	Ac1	Ac2	Ac3	id	logFoldChange	PValueRaw	PValueFDRadjusted	baseMean	baseMeanA	baseMeanB	No1	No2	No3	Ac1	Ac2	Ac3	id	logFoldChange	PValueRaw	PValueFDRadjusted	baseMean	baseMeanA	baseMeanB	No1	No2	No3	Ac1	Ac2	Ac3	id	logFoldChange	PValueRaw	PValueFDRadjusted	baseMean	baseMeanA	baseMeanB	No1	No2	No3	Ac1
Olfr1395	1.86978	5.18798e-12	5.64453e-09	769.027	284.477	1253.58	263	195	354	882	477	2418	Olfr1395	2.93316	2.95332e-57	3.21321e-54	1125.25	279.257	1971.24	263	195	354	1924	1555	2734	Olfr1395	2.4758	1.36505e-22	1.48517e-19	679.734	213.828	1145.64	182	205	202	867	1935	991	Olfr531	1.99943	8.84298e-18	9.62116e-15	571.879	212.857	930.9	218	227	134	862
Olfr165	2.13059	1.40738e-08	7.65615e-06	74.4193	25.4193	123.419	27	17	29	100	55	218	Olfr1297	3.19335	1.25931e-27	6.85067e-25	201.672	40.9279	362.416	38	43	40	345	282	519	Olfr531	2.33499	1.53413e-19	8.34568e-17	601.439	194.773	1008.1	218	227	134	702	1903	817	Olfr376	2.35421	5.33687e-15	2.90326e-12	396.492	117.709	675.275	151	96	78	513
Olfr1297	2.12689	1.34039e-07	4.86114e-05	120.606	41.6994	199.512	38	43	40	231	97	275	Olfr165	3.16555	1.28993e-22	4.67815e-20	119.752	24.953	214.55	27	17	29	171	162	356	Olfr376	2.68343	6.06923e-18	2.20111e-15	407.767	107.706	707.828	151	96	78	556	1290	542	Olfr539	2.19899	1.83437e-14	6.65267e-12	238.189	78.4126	397.966	72	97	45	300
													Olfr186	2.86731	7.20138e-16	1.95878e-13	139.77	35.3104	244.229	40	48	19	256	193	316	Olfr1352	2.5178	5.63743e-15	1.53338e-12	193.821	58.9564	328.687	62	47	56	273	474	307	Olfr1065	2.33742	9.50611e-13	2.58566e-10	147.152	45.1058	249.197	47	32	38	188
													Olfr531	1.32464	5.69396e-14	1.23901e-11	674.181	395.914	952.447	393	394	384	943	818	1213	Olfr463	2.21824	9.34389e-15	2.03323e-12	281.573	98.884	464.261	110	111	71	389	787	366	Olfr506	2.60477	1.75527e-12	3.81947e-10	144.858	36.1135	253.603	51	29	22	198
													Olfr164	2.71262	8.70864e-14	1.57917e-11	83.4949	21.8517	145.138	23	23	19	84	149	227	Olfr1297	2.76056	1.59577e-14	2.89367e-12	153.721	38.4716	268.97	48	37	29	183	462	247	Olfr1297	2.22376	9.59409e-12	1.73973e-09	130.359	42.0499	218.668	48	37	29	191
													Olfr196	1.91231	1.44253e-08	2.2421e-06	85.22	36.6567	133.783	33	30	44	171	81	168	Olfr1160	3.6045	4.68082e-14	7.27533e-12	51.1314	7.63994	94.6229	10	5	7	69	142	94	Olfr20	2.19015	1.9927e-11	3.09723e-09	142.171	47.1632	237.18	51	30	41	185
													Olfr1352	1.41342	6.24126e-07	8.48811e-05	120.459	68.4426	172.476	86	40	75	206	97	245	Olfr527	2.01258	9.11632e-14	1.23982e-11	464.801	181.564	748.039	235	200	117	605	1125	688	Olfr1395	1.58836	5.94141e-11	8.08032e-09	492.157	233.873	750.441	182	205	202	548
													Olfr61	1.5937	8.37522e-07	0.000101247	131.7	66.4629	196.937	59	90	50	126	194	304	Olfr196	2.67373	1.88977e-12	2.08074e-10	106.86	29.2942	184.426	33	23	27	144	307	158	Olfr1474	2.07246	1.31736e-10	1.59254e-08	106.533	38.9635	174.102	33	38	30	161
													Olfr527	0.910613	1.12396e-05	0.00122287	456.664	323.075	590.253	332	348	281	461	574	816	Olfr164	3.09395	1.91244e-12	2.08074e-10	71.0937	14.4522	127.735	14	12	14	60	246	127	Olfr1477	2.28511	4.33692e-10	4.71856e-08	93.2116	29.1143	157.309	31	21	24	112
													Olfr110	0.952126	1.49681e-05	0.00148048	381.339	268.18	494.498	224	287	279	466	420	666	Olfr1474	2.40746	6.04442e-12	5.97848e-10	110.559	35.6353	185.482	33	38	30	172	273	154	Olfr1087	2.35951	1.69595e-09	1.67745e-07	74.3031	22.6636	125.943	21	15	21	83
													Olfr176	6.41265	0.000243486	0.022076	6.08441	0	12.1688	0	0	0	0	0	45	Olfr165	3.11398	2.61998e-11	2.37545e-09	71.3262	14.0121	128.64	24	11	9	83	225	120	Olfr96	1.65015	4.54201e-09	4.11809e-07	258.721	113.59	403.851	99	111	86	262
													Olfr376	1.1368	0.000279438	0.0233868	166.123	106.01	226.237	87	120	106	251	146	320	Olfr173	2.91959	5.70065e-11	4.771e-09	57.261	12.8163	101.706	22	12	7	84	162	87	Olfr1047	2.22808	1.43006e-08	1.19685e-06	59.3185	18.436	100.201	16	18	14	59
													Olfr31	0.998293	0.000487332	0.0378727	126.929	86.9907	166.867	77	80	98	164	117	250	Olfr1353	2.45419	7.43867e-11	5.78091e-09	85.8496	27.2283	144.471	23	29	24	142	223	107	Olfr1463	1.47129	1.78712e-08	1.38885e-06	272.698	140.866	404.53	109	96	139	297
													Olfr56	0.965467	0.000577987	0.0419233	176.209	121.856	230.562	146	135	85	291	180	239	Olfr61	2.15108	1.09697e-10	7.47277e-09	145.511	52.4687	238.552	73	52	35	232	399	162	Olfr30	1.71482	2.23406e-08	1.62044e-06	649.734	279.18	1020.29	422	237	149	833
																										Olfr186	2.85968	1.09894e-10	7.47277e-09	126.607	32.9262	220.287	30	19	38	182	428	146	Olfr1054	2.36251	4.92896e-08	3.3517e-06	43.5783	12.5411	74.6156	11	13	9	55
																										Olfr187	2.62748	1.12136e-09	7.17671e-08	53.0962	15.8652	90.3272	14	10	18	82	114	87	Olfr196	1.86462	2.11131e-07	1.35124e-05	79.8404	32.0355	127.645	33	23	27	95
																										Olfr177	2.52243	1.83691e-09	1.11031e-07	56.4684	16.1588	96.7779	21	20	9	71	183	75	Olfr1451	2.17316	3.35788e-07	2.02965e-05	41.3422	14.3919	68.2924	10	11	14	43
																										Olfr330	2.03855	2.34641e-09	1.34363e-07	189.282	72.5841	305.98	106	80	41	236	498	271	Olfr1133	2.20462	6.73039e-07	3.85403e-05	36.9469	12.6537	61.2401	8	14	10	56
																										Olfr110	1.62483	3.92304e-09	2.13414e-07	457.318	220.277	694.36	285	225	153	529	1210	577	Olfr1160	2.53184	7.55162e-07	4.10808e-05	32.0026	8.35427	55.6509	10	5	7	34
																										Olfr31	2.08589	1.97711e-08	1.02433e-06	164.065	58.7892	269.341	80	68	34	167	621	175	Olfr110	1.29707	1.56132e-06	7.38573e-05	453.619	240.72	666.518	285	225	153	501
																										Olfr1302	2.4079	2.56612e-07	1.26906e-05	33.3615	11.0065	55.7164	7	13	10	41	80	57	Olfr186	1.71728	1.91041e-06	8.66054e-05	75.3885	36.0338	114.743	30	19	38	122
																										Olfr1085	2.42752	3.36379e-07	1.59122e-05	38.665	13.3136	64.0164	13	6	16	58	84	60	Olfr136	1.35256	4.16627e-06	0.000174342	268.017	140.732	395.301	178	101	103	326
																										Olfr136	1.60535	5.24059e-07	2.37574e-05	260.406	128.745	392.067	178	101	103	322	650	323	Olfr1352	1.40725	4.36299e-06	0.000175812	126.37	64.4803	188.259	62	47	56	166
																										Olfr1466	2.22317	1.85962e-06	8.09307e-05	34.9861	12.5408	57.4315	13	10	12	43	99	49	Olfr1466	2.0448	4.88033e-06	0.000189636	39.5893	13.7161	65.4625	13	10	12	37
																										Olfr220	1.33949	3.35782e-06	0.000140512	334.207	188.359	480.055	232	169	151	441	820	340	Olfr1457	2.27138	7.77063e-06	0.000291533	26.5769	8.09166	45.0621	8	9	5	34
																										Olfr1471	2.1684	3.76074e-06	0.000147309	45.8141	16.0652	75.5629	24	11	13	47	105	87	Olfr463	1.42371	9.11795e-06	0.000330678	223.887	108.075	339.699	110	111	71	205
																										Olfr56	1.63253	3.79104e-06	0.000147309	200.026	93.9201	306.132	69	114	79	183	786	161	Olfr1093	1.98113	9.6736e-06	0.000333928	89.7056	31.1575	148.254	48	30	14	104
																										Olfr1093	1.83143	9.27677e-06	0.000348039	66.4728	28.5316	104.414	48	30	14	86	160	93	Olfr1302	2.01423	1.0939e-05	0.000350049	31.6717	12.0379	51.3055	7	13	10	37
																										Olfr1132	2.58084	2.1938e-05	0.000795619	32.5026	9.66688	55.3382	23	3	6	48	105	36	Olfr527	1.14888	1.80658e-05	0.000561588	343.811	198.386	489.236	235	200	117	455
																										Olfr837	4.6722	5.6902e-05	0.00194415	5.38849	0.244646	10.5323	1	0	0	13	17	5	Olfr338	2.42426	2.35168e-05	0.00071073	24.975	6.50341	43.4466	11	7	2	40
																										Olfr325	1.51427	5.71809e-05	0.00194415	68.5423	34.9664	102.118	51	43	17	102	147	80	Olfr1471	1.91113	3.07566e-05	0.00090441	46.0157	17.5609	74.4705	24	11	13	54
																										Olfr205	1.45852	0.000152937	0.00504228	76.3473	42.9999	109.695	40	30	46	96	171	91	Olfr170	1.38006	3.27715e-05	0.000938299	100.521	51.5985	149.444	52	50	36	170
																										Olfr449	1.04142	0.000261852	0.00837925	475.429	303.355	647.503	389	288	226	536	1293	409	Olfr533	0.904738	7.46168e-05	0.00176485	413.595	270.821	556.368	351	285	138	668
																										Olfr30	1.08478	0.000340123	0.010573	401.205	255.581	546.83	422	237	149	457	940	425	Olfr177	1.62659	7.91015e-05	0.00183112	38.9463	17.6515	60.241	21	20	9	66
																										Olfr170	1.2772	0.00041214	0.0124558	81.7298	47.2043	116.255	52	50	36	89	223	85	Olfr141	1.95145	8.91737e-05	0.00194678	33.3053	12.7549	53.8558	26	7	6	60
																										Olfr45	1.57991	0.000734098	0.0211004	43.5932	21.0449	66.1414	31	18	15	39	123	61	Olfr532	1.39262	9.18881e-05	0.00194678	74.1319	37.8336	110.43	52	38	19	108
																										Olfr1477	1.4017	0.000736961	0.0211004	49.5289	26.6248	72.433	31	21	24	45	96	86	Olfr381	2.08031	0.000102045	0.00205602	31.2969	10.4609	52.133	19	9	4	42
																										Olfr541	1.14264	0.000857678	0.023927	107.343	66.3675	148.318	74	69	51	115	272	114	Olfr111	1.31841	0.000123145	0.00239254	98.7577	51.6024	145.913	51	54	34	126
																										Olfr462	1.27144	0.00144539	0.0393146	74.9968	44.714	105.279	55	72	16	86	173	88	Olfr32	1.53821	0.000138246	0.00263881	102.195	45.6927	158.698	56	51	23	104
																										Olfr1051	2.56491	0.00157275	0.0417353	10.0996	3.37001	16.8291	2	9	0	14	31	12	Olfr173	1.70832	0.000267533	0.00477174	33.1833	13.9979	52.3686	22	12	7	51
																																							Olfr490	2.15328	0.000314974	0.00543955	17.9377	6.88607	28.9894	5	3	8	28
																																							Olfr57	1.2408	0.000367121	0.00587393	70.7275	39.0913	102.364	53	36	22	118
																																							Olfr1353	1.30075	0.000383612	0.00587845	55.8357	29.7755	81.8959	23	29	24	54
																																							Olfr462	1.50132	0.000402355	0.00599674	102.358	48.8176	155.899	55	72	16	93
																																							Olfr1449	1.93724	0.000469772	0.00663781	21.14	7.71242	34.5677	10	8	4	26
																																							Olfr837	4.11576	0.000558794	0.00759959	4.4929	0.266585	8.71922	1	0	0	8
																																							Olfr165	1.58991	0.000702143	0.00898743	33.4697	15.3082	51.6312	24	11	9	46
																																							Olfr874	1.19584	0.00078327	0.00957526	68.9711	39.2446	98.6975	54	26	28	101
																																							Olfr180	1.28652	0.00102073	0.0119415	69.6886	38.283	101.094	49	19	33	76
																																							Olfr1094	1.77378	0.00128544	0.0141268	27.2274	11.5833	42.8714	20	5	8	35
																																							Olfr164	1.45789	0.00139628	0.0148937	31.859	15.8075	47.9105	14	12	14	29
																																							Olfr895	1.19	0.00230121	0.0215838	49.449	27.9954	70.9027	26	20	25	45
																																							Olfr178	1.6187	0.00244169	0.0225931	20.4642	9.43595	31.4924	7	12	6	28
																																							Olfr1104	0.98467	0.00339495	0.0273608	203.016	129.148	276.884	170	82	98	219
																																							Olfr1243	1.23025	0.00408447	0.0313136	32.8806	18.6386	47.1226	22	14	14	50
																																							Olfr199	1.59351	0.00410484	0.0313136	27.3349	13.3929	41.277	12	5	15	24
																																							Olfr209	1.19528	0.00411567	0.0313136	37.6924	21.5111	53.8737	22	19	16	48
																																							Olfr31	0.964413	0.00423658	0.0320097	101.704	64.2226	139.186	80	68	34	137
																																							Olfr1079	0.945958	0.00441458	0.0328977	71.5646	46.754	96.3751	40	34	43	80
																																							Olfr464	0.831899	0.00473269	0.0338891	202.598	135.776	269.42	127	108	114	175
																																							Olfr191	1.11181	0.00507861	0.03542	57.652	34.0141	81.2898	52	19	24	73
																																							Olfr535	1.00209	0.00644569	0.0424284	72.0171	45.2387	98.7956	57	57	18	96
																																							Olfr350	0.994476	0.00647346	0.0424284	58.3521	36.1204	80.5838	28	24	36	45
																																							Olfr502	1.28631	0.00678457	0.0429163	30.9729	16.3599	45.586	23	18	7	44
																																							Olfr1132	1.58232	0.00723269	0.0454865	20.9804	10.5582	31.4026	23	3	6	38
																																							Olfr187	1.23062	0.00770765	0.047112	29.7697	17.3618	42.1776	14	10	18	28
																																							Olfr898	2.18015	0.00792305	0.0473641	7.78339	2.38061	13.1862	5	3	0	14
[truncated: 2 more columns]
