# Supplementary material for: Concentration-Dependent Recruitment of Mammalian Odorant Receptors
Source: eNeuro. 2020 Apr 15;7(2):ENEURO.0103-19.2019. doi: 10.1523/ENEURO.0103-19.2019 (PMC7189481; doi:10.1523/ENEURO.0103-19.2019)
Supplement: Extended Data Figure 4-2 — Comparison across Jiang et al. (2015)’s 86 responsive ACT OR + Olfr888. Download Figure 4-2, XLSX file. [file enu-eN-NWR-0103-19-s23.xlsx]

## Sheet: Table 86 Jiang ACT ORs Olfr888
1% ACT	Jiang et al. 2015 fastq	CDS+Bowtie alignment	1% ACT	Jiang et.al 2015 fastq	UTR+STAR alignment	1% ACT	Current 2019 fastq	UTR+STAR alignment		100% ACT	Jiang et al. 2015 fastq	CDS+Bowtie alignment	100% ACT	Jiang et.al 2015 fastq	UTR+STAR alignment	100% ACT	Current 2019 fastq	UTR+STAR alignment
86 ACT ORs	logFoldChange	PValueFDRadjusted	id	logFoldChange	PValueFDRadjusted	id	logFoldChange	PValueFDRadjusted		86 ACT ORs	logFoldChange	PValueFDRadjusted	id	logFoldChange	PValueFDRadjusted	id	logFoldChange	PValueFDRadjusted
Olfr1009	0.994402	0.495107	Olfr1009	1.24182	0.477992	Olfr1009	0.419377	0.682945		Olfr1009	2.10318	0.000208244	Olfr1009	0.833947	0.446867	Olfr1009	1.45749	0.150309
Olfr1026	2.03936	0.0264781	Olfr1026	1.79712	0.319351	Olfr1026	1.50528	0.0493693		Olfr1026	3.07474	5.22222e-12	Olfr1026	2.38173	0.000132103	Olfr1026	0.642617	0.629702
Olfr1043	0.944901	0.664617	Olfr1043	0.771234	0.730085	Olfr1043	0.425782	0.704729		Olfr1043	2.9495	9.1913e-06	Olfr1043	1.80267	0.0342742	Olfr1043	2.40261	3.89586e-05
Olfr1045	-0.546028	0.795248	Olfr1045	-0.0294088	1	Olfr1045	0.0216855	0.996466		Olfr1045	2.18848	0.000163637	Olfr1045	2.48495	1.38927e-07	Olfr1045	1.95886	0.00300886
Olfr1047	1.40575	0.487086	Olfr1047	1.47411	0.4547	Olfr1047	0.40414	0.665958		Olfr1047	4.38561	6.02439e-13	Olfr1047	2.88305	0.0205128	Olfr1047	1.44316	0.0277572
Olfr1054	1.52456	0.585306	Olfr1054	1.39621	0.681066	Olfr1054	0.888682	0.362436		Olfr1054	2.3444	0.000764408	Olfr1054	2.35663	0.00644762	Olfr1054	2.4551	1.26947e-05
Olfr1065	1.64028	0.504773	Olfr1065	0.702742	0.731447	Olfr1065	-0.00718377	1		Olfr1065	1.88882	0.027254	Olfr1065	1.28331	0.182306	Olfr1065	2.07522	3.89586e-05
Olfr1087	-0.28676	1	Olfr1087	-0.212271	1	Olfr1087	1.06048	0.202438		Olfr1087	4.0103	1.54806e-07	Olfr1087	3.95572	3.1609e-08	Olfr1087	2.37577	1.26947e-05
Olfr1093	0.679511	0.75733	Olfr1093	0.760765	0.767308	Olfr1093	0.643815	0.528715		Olfr1093	1.31307	0.0382198	Olfr1093	0.936248	0.386329	Olfr1093	1.6429	0.00273851
Olfr1094	2.3848	0.517046	Olfr1094	1.69237	0.610447	Olfr1094	0.589351	0.629371		Olfr1094	3.23841	0.000830265	Olfr1094	2.18002	0.034139	Olfr1094	1.43165	0.0360246
Olfr110	0.865823	0.377214	Olfr110	1.02103	0.377612	Olfr110	0.897086	0.220276		Olfr110	2.20424	1.3847e-10	Olfr110	1.54163	0.000320486	Olfr110	1.2696	0.000741858
Olfr1102	4.47195	0.182402	Olfr1102	2.2847	0.512056	Olfr1102	0.677762	0.344262		Olfr1102	4.69737	0.000178223	Olfr1102	2.23068	0.375418	Olfr1102	1.51532	0.00841347
Olfr1104	2.18182	0.00550202	Olfr1104	2.31931	0.00106917	Olfr1104	1.0966	0.00208684		Olfr1104	2.79327	1.39868e-11	Olfr1104	2.11544	1.25282e-05	Olfr1104	1.43502	0.000153349
Olfr1157	2.87407	0.0061399	Olfr1157	2.73541	0.00524432	Olfr1157	0.762658	0.332697		Olfr1157	-0.0975916	1	Olfr1157	-0.453627	0.783923	Olfr1157	1.68767	0.000809249
Olfr1222	1.34059	0.0317938	Olfr1222	1.5378	0.0376593	Olfr1222	0.325576	0.569422		Olfr1222	0.582626	0.461832	Olfr1222	0.112141	0.978959	Olfr1222	0.0294647	0.999533
Olfr1238	7.02965	0.00199129	Olfr1238	3.46084	0.0349649	Olfr1238	0.609544	0.4204		Olfr1238	6.7895	0.0143084	Olfr1238	0.667433	0.764406	Olfr1238	1.25816	0.00789392
Olfr1245	NA	1	Olfr1245	5.08127e-17	1	Olfr1245	0.448605	0.86375		Olfr1245	6.33866	0.0399841	Olfr1245	5.55526	0.105536	Olfr1245	0.924009	0.627906
Olfr1289	1.48259	0.671621	Olfr1289	0.386557	1	Olfr1289	-0.588016	0.844435		Olfr1289	3.88845	0.0197869	Olfr1289	2.07927	0.505378	Olfr1289	-0.228862	0.958738
Olfr133	0.45737	0.84399	Olfr133	0.884632	0.637582	Olfr133	0.913613	0.209942		Olfr133	3.19598	0.000348397	Olfr133	1.66983	0.0849479	Olfr133	1.72637	0.0141326
Olfr1333	0.619435	0.893816	Olfr1333	1.67857	0.295351	Olfr1333	0.0712227	0.95854		Olfr1333	7.62524	0.000392941	Olfr1333	1.32501	0.535237	Olfr1333	1.31708	0.00450617
Olfr136	2.40504	2.05957e-08	Olfr136	2.75642	0.000460774	Olfr136	1.76846	1.01038e-07		Olfr136	2.27825	6.50076e-12	Olfr136	1.47896	0.0792605	Olfr136	1.49515	2.25999e-05
Olfr1377	2.57151	4.69114e-06	Olfr1377	3.09144	6.91515e-09	Olfr1377	2.19768	0.00101481		Olfr1377	2.01382	4.08132e-05	Olfr1377	1.71401	0.00124841	Olfr1377	1.27924	0.0290514
Olfr1444	-0.19175	1	Olfr1444	-0.120578	1	Olfr1444	0.000168006	1		Olfr1444	1.75728	0.00401309	Olfr1444	1.50786	0.0664031	Olfr1444	1.44703	0.0418277
Olfr1448	1.402	0.454649	Olfr1448	1.21853	0.360738	Olfr1448	0.184175	0.79435		Olfr1448	2.25067	3.54153e-05	Olfr1448	1.44671	0.0682244	Olfr1448	0.698136	0.180689
Olfr1449	-1.49818	0.487086	Olfr1449	-1.53909	0.512056	Olfr1449	0.356762	0.850452		Olfr1449	2.59648	0.000103424	Olfr1449	2.40843	0.0208969	Olfr1449	2.47546	0.00110063
Olfr145	3.69426	0.128535	Olfr145	2.73311	2.28478e-05	Olfr145	1.74367	0.0493693		Olfr145	4.02085	0.0189375	Olfr145	0.318985	0.782924	Olfr145	1.39348	0.0259527
Olfr1451	2.23669	0.487086	Olfr1451	2.46984	0.352587	Olfr1451	1.17497	0.443876		Olfr1451	3.1215	0.011873	Olfr1451	2.00692	0.208275	Olfr1451	3.00542	0.000741858
Olfr1461	1.62938	0.517046	Olfr1461	1.93975	0.390714	Olfr1461	0.380222	0.750306		Olfr1461	3.71915	0.000336508	Olfr1461	2.68844	0.0200489	Olfr1461	0.826915	0.419527
Olfr1463	1.27026	0.140179	Olfr1463	1.37873	0.129354	Olfr1463	0.367109	0.59235		Olfr1463	1.59782	8.9071e-06	Olfr1463	0.847986	0.249976	Olfr1463	1.29264	0.00172896
Olfr147	1.0858	0.626149	Olfr147	0.786435	0.761866	Olfr147	0.837336	0.249938		Olfr147	3.47387	2.2291e-11	Olfr147	2.16655	0.00261039	Olfr147	1.7003	0.00302761
Olfr1477	1.3247	0.504773	Olfr1477	1.5971	0.474956	Olfr1477	0.981153	0.197675		Olfr1477	3.1171	6.28438e-06	Olfr1477	1.99392	0.00675113	Olfr1477	2.37006	1.85101e-07
Olfr1484	1.55953	0.288927	Olfr1484	1.97104	0.241471	Olfr1484	0.468598	0.441679		Olfr1484	1.76995	0.0344008	Olfr1484	1.59187	0.0765263	Olfr1484	0.855433	0.0604469
Olfr1505	1.11312	0.889827	Olfr1505	-0.0933291	1	Olfr1505	0.200669	0.879788		Olfr1505	3.20678	0.0147701	Olfr1505	1.40031	0.446867	Olfr1505	1.46643	0.0499301
Olfr1513	1.02311	0.671621	Olfr1513	0.0961031	0.998098	Olfr1513	0.380904	0.652398		Olfr1513	6.47823	0.0151673	Olfr1513	0.202727	0.969563	Olfr1513	0.18655	0.902064
Olfr160	1.61406	0.28678	Olfr160	1.49315	0.39428	Olfr160	0.579648	0.564458		Olfr160	3.47788	0.000185833	Olfr160	3.13788	0.0664031	Olfr160	1.72644	0.00477648
Olfr166	1.36017	0.0299374	Olfr166	1.66632	0.0652791	Olfr166	0.159863	0.829392		Olfr166	0.284336	0.689047	Olfr166	0.367758	0.535237	Olfr166	-0.0902164	0.934135
Olfr19	0.708796	0.763126	Olfr19	1.19819	0.632795	Olfr19	0.154766	0.851792		Olfr19	4.32622	2.04656e-19	Olfr19	3.33341	1.45781e-05	Olfr19	1.43918	0.0169125
Olfr191	2.44129	0.246169	Olfr191	1.80336	0.362818	Olfr191	0.358978	0.663336		Olfr191	3.32527	0.0110686	Olfr191	1.64766	0.0849479	Olfr191	0.413933	0.64561
Olfr196	3.13047	0.0269923	Olfr196	1.86984	0.390714	Olfr196	1.30964	0.331771		Olfr196	1.67378	0.2164	Olfr196	0.834022	0.494705	Olfr196	1.17216	0.0146734
Olfr205	2.27994	0.14947	Olfr205	2.23405	0.238769	Olfr205	0.384473	0.787181		Olfr205	2.63652	0.00552549	Olfr205	0.985342	0.506496	Olfr205	0.97582	0.0925063
Olfr229	1.34696	0.356288	Olfr229	1.43141	0.319351	Olfr229	-0.631159	0.505258		Olfr229	3.17927	0.00592737	Olfr229	0.469328	0.915827	Olfr229	0.490711	0.562383
Olfr247	1.21084	0.487086	Olfr247	1.31229	0.717376	Olfr247	0.626091	0.663336		Olfr247	2.4265	5.99623e-09	Olfr247	1.9116	0.361687	Olfr247	1.94504	0.023259
Olfr30	0.549354	0.551362	Olfr30	0.407806	0.593165	Olfr30	0.591044	0.308068		Olfr30	2.63643	2.51364e-13	Olfr30	1.37797	0.0422167	Olfr30	2.1307	2.21529e-15
Olfr309	1.28191	0.00271605	Olfr309	1.49094	0.0191715	Olfr309	0.465298	0.43602		Olfr309	0.438596	0.45458	Olfr309	0.247176	0.771033	Olfr309	0.595943	0.0618769
Olfr348	-0.196415	1	Olfr348	0.0368597	1	Olfr348	0.0947121	0.95854		Olfr348	3.36095	3.98433e-06	Olfr348	1.56378	0.0853497	Olfr348	1.85563	0.00076334
Olfr376	1.24879	0.000700743	Olfr376	1.53785	0.00078937	Olfr376	2.67501	3.11295e-16		Olfr376	3.30066	5.74007e-22	Olfr376	2.59089	1.0469e-06	Olfr376	2.22672	1.18225e-09
Olfr397	0.57025	0.702642	Olfr397	1.00276	0.390714	Olfr397	0.499078	0.410806		Olfr397	1.70374	0.000155956	Olfr397	0.850949	0.254002	Olfr397	2.59635	4.81943e-12
Olfr430	1.28795	0.304709	Olfr430	1.62467	0.241471	Olfr430	1.52079	0.00120063		Olfr430	2.19946	9.78973e-05	Olfr430	1.61799	0.683291	Olfr430	0.805023	0.150309
Olfr44	1.2209	0.532783	Olfr44	1.61685	0.506639	Olfr44	0.0341039	0.985522		Olfr44	2.1399	0.0061382	Olfr44	0.507621	0.927562	Olfr44	0.244857	0.846905
Olfr473	-0.583432	0.897989	Olfr473	-0.38804	0.916888	Olfr473	-0.0591193	0.973572		Olfr473	2.11323	0.00552549	Olfr473	1.56614	0.15256	Olfr473	1.28507	0.0970437
Olfr478	1.11484	0.703598	Olfr478	1.7634	0.512056	Olfr478	1.75913	0.00658816		Olfr478	3.74972	0.000110521	Olfr478	2.31757	0.00151944	Olfr478	2.20592	0.000282962
Olfr490	0.590427	0.893816	Olfr490	0.820335	0.809496	Olfr490	1.56462	0.221473		Olfr490	3.74337	3.63946e-07	Olfr490	2.76132	0.0102834	Olfr490	1.74515	0.0899799
Olfr491	1.97573	2.39043e-09	Olfr491	2.11559	2.42026e-06	Olfr491	1.0249	0.0119493		Olfr491	1.51081	0.000366739	Olfr491	1.19456	0.0521221	Olfr491	0.943119	0.0988669
Olfr502	2.58337	0.534475	Olfr502	0.778884	0.821582	Olfr502	0.563533	0.531698		Olfr502	3.77572	0.00266332	Olfr502	3.52104	5.83396e-05	Olfr502	1.19422	0.105452
Olfr520	1.1863	0.534617	Olfr520	1.12441	0.602486	Olfr520	0.990789	0.510061		Olfr520	2.99694	0.00870557	Olfr520	1.57201	0.44956	Olfr520	1.50971	0.236888
Olfr566	1.82227	0.0299374	Olfr566	2.05462	0.0261204	Olfr566	0.52068	0.570541		Olfr566	-0.280187	0.869532	Olfr566	-0.299181	0.861233	Olfr566	-0.180736	0.921409
Olfr57	2.08274	0.0250708	Olfr57	2.16499	0.038558	Olfr57	-0.122925	0.917609		Olfr57	0.369397	0.838583	Olfr57	0.0347454	1	Olfr57	0.848867	0.408533
Olfr60	-0.413196	0.848374	Olfr60	0.27551	0.871353	Olfr60	0.383784	0.56104		Olfr60	2.04323	0.0189375	Olfr60	1.88962	0.000122826	Olfr60	0.649014	0.0703496
Olfr62	0.524512	0.793093	Olfr62	0.495041	0.691826	Olfr62	-0.0633307	0.964736		Olfr62	2.43196	0.00281576	Olfr62	1.14358	0.386329	Olfr62	0.693494	0.260966
Olfr672	1.92413	0.00271605	Olfr672	2.14016	0.0403947	Olfr672	0.111846	0.873122		Olfr672	0.816872	0.280301	Olfr672	0.494245	0.615964	Olfr672	-0.533402	0.226531
Olfr727	1.37386	0.0437015	Olfr727	1.38735	0.152025	Olfr727	0.47601	0.229045		Olfr727	0.941261	0.177758	Olfr727	0.191362	0.891721	Olfr727	0.0763034	0.915519
Olfr736	0.70235	0.821681	Olfr736	0.897385	0.714808	Olfr736	0.891445	0.37473		Olfr736	2.48284	0.016626	Olfr736	2.0534	0.00954291	Olfr736	1.81659	0.0806731
Olfr739	0.349982	0.892778	Olfr739	0.337218	0.821612	Olfr739	0.22428	0.755097		Olfr739	1.6432	0.0189375	Olfr739	1.08519	0.0664031	Olfr739	1.2648	0.0217418
Olfr744	1.727	0.0278617	Olfr744	1.92375	0.049321	Olfr744	1.67722	0.00244239		Olfr744	3.33516	3.13684e-11	Olfr744	2.28361	7.3071e-07	Olfr744	0.382707	0.777912
Olfr745	2.03626	9.44077e-05	Olfr745	2.14483	0.00198863	Olfr745	0.840589	0.119054		Olfr745	3.26031	9.99692e-27	Olfr745	2.46627	1.04024e-06	Olfr745	0.933583	0.146217
Olfr746	3.40027	0.263053	Olfr746	2.77898	0.414745	Olfr746	0.422168	0.78984		Olfr746	3.01132	0.0147701	Olfr746	2.50359	0.0342742	Olfr746	1.5904	0.105452
Olfr749	2.81803	5.35073e-14	Olfr749	2.97354	9.82577e-08	Olfr749	1.33781	0.00339705		Olfr749	2.75387	1.81186e-17	Olfr749	1.98646	0.00636456	Olfr749	0.42351	0.611179
Olfr819	-1.43638	0.86663	Olfr819	1.78793	0.390714	Olfr819	0.51364	0.612954		Olfr819	4.14047	0.000316243	Olfr819	1.61256	0.0957952	Olfr819	1.39945	0.133947
Olfr872	2.7139	0.551362	Olfr872	1.2459	0.731447	Olfr872	0.228306	0.943665		Olfr872	6.66141	0.0169444	Olfr872	1.87865	0.814092	Olfr872	0.639798	0.786684
Olfr874	1.2784	0.438325	Olfr874	1.69002	0.275032	Olfr874	1.51149	0.0777826		Olfr874	2.57425	5.3112e-07	Olfr874	1.93813	1.25282e-05	Olfr874	1.66033	0.00709103
Olfr875	2.91056	0.0437015	Olfr875	2.60754	0.169264	Olfr875	0.232844	0.829392		Olfr875	3.17202	1.3847e-10	Olfr875	1.78709	0.0664302	Olfr875	1.4938	0.00797802
Olfr876	4.79303	3.28607e-05	Olfr876	3.48731	0.00106917	Olfr876	1.66621	0.140981		Olfr876	3.12171	3.79593e-06	Olfr876	2.62217	0.00658686	Olfr876	0.94406	0.379723
Olfr881	1.03582	0.889195	Olfr881	2.78913	0.169264	Olfr881	1.77115	0.0308202		Olfr881	4.12134	0.000135763	Olfr881	3.56923	3.16451e-07	Olfr881	1.61322	0.188883
Olfr884	-1.18107	0.930771	Olfr884	0.668703	0.825061	Olfr884	0.424198	0.570541		Olfr884	5.07612	1.75414e-05	Olfr884	2.24844	0.00675113	Olfr884	2.14516	0.000768914
Olfr887	1.15433	0.677701	Olfr887	1.2864	0.610447	Olfr887	-0.1334	0.912696		Olfr887	3.32623	0.0328732	Olfr887	1.53425	0.505378	Olfr887	0.577455	0.511976
Olfr895	2.61589	0.10743	Olfr895	2.61508	0.160828	Olfr895	0.0310085	0.99624		Olfr895	3.5643	1.25904e-08	Olfr895	2.22373	0.032716	Olfr895	2.03604	0.00045388
Olfr901	2.45376	0.0305407	Olfr901	2.91971	0.0180432	Olfr901	1.13753	0.0119493		Olfr901	0.712642	0.51506	Olfr901	0.164346	0.973228	Olfr901	-0.212955	0.857663
Olfr904	3.24267	0.141768	Olfr904	3.10658	0.247603	Olfr904	0.871621	0.648579		Olfr904	3.98935	0.0161406	Olfr904	1.63322	0.697665	Olfr904	2.35022	0.0095008
Olfr910	6.51294	0.0226172	Olfr910	2.89859	0.404468	Olfr910	0.65908	0.342436		Olfr910	1.85332	0.429528	Olfr910	1.4645	0.505219	Olfr910	0.877218	0.0970437
Olfr918	2.54163	0.324192	Olfr918	2.36729	0.352587	Olfr918	1.02149	0.37473		Olfr918	3.51442	9.78973e-05	Olfr918	1.14069	0.2789	Olfr918	1.84483	0.0703773
Olfr920	0.790054	0.739121	Olfr920	0.804636	0.717586	Olfr920	-0.293069	0.845976		Olfr920	2.32488	0.0081613	Olfr920	2.16775	0.000921094	Olfr920	0.710268	0.292424
Olfr923	4.21279	2.68502e-32	Olfr923	4.26227	3.12267e-24	Olfr923	3.11159	1.71515e-07		Olfr923	3.32839	2.63127e-14	Olfr923	2.58607	0.00675113	Olfr923	2.27229	1.06052e-06
Olfr935	1.49485	0.626149	Olfr935	1.08505	0.731447	Olfr935	0.38189	0.773232		Olfr935	2.53155	0.000225449	Olfr935	1.71641	0.0521221	Olfr935	1.7778	0.0061068
Olfr937	3.24462	0.212947	Olfr937	3.73799	0.0384754	Olfr937	0.0820269	0.95854		Olfr937	4.98032	2.05276e-14	Olfr937	3.19972	0.00139552	Olfr937	1.97842	0.00709103
Olfr970	1.22445	0.392307	Olfr970	1.05289	0.470936	Olfr970	0.255339	0.81138		Olfr970	2.34884	0.0106421	Olfr970	0.90887	0.572722	Olfr970	1.08143	0.128971
Olfr983	2.40612	3.28607e-05	Olfr983	2.57945	0.00106917	Olfr983	1.01534	0.0363392		Olfr983	2.21443	3.98433e-06	Olfr983	2.97068	2.14671e-06	Olfr983	-0.00184063	1
Olfr888	2.18468	0.671621	Olfr888	1.74882	0.661662	Olfr888	3.09623	0.00222986		Olfr888	3.85223	0.469578	Olfr888	9.08138	1.03912e-13	Olfr888	2.82464	0.00487642
