# Supplementary material for: Concentration-Dependent Recruitment of Mammalian Odorant Receptors
Source: eNeuro. 2020 Apr 15;7(2):ENEURO.0103-19.2019. doi: 10.1523/ENEURO.0103-19.2019 (PMC7189481; doi:10.1523/ENEURO.0103-19.2019)
Supplement: Extended Data Figure 5-3 — Differential expression data based on von der Weid et al. (2015)’s DREAM data. Download Figure 5-3, XLSX file. [file enu-eN-NWR-0103-19-s25.xlsx]

## Sheet: Table DREAM UTR+STAR 
EdgeR DE analysis - DREAM (Weid et al., 2015 ) fastq aligned with CDS+UTRs using STAR							Read counts
id	logFoldChange	PValueRaw	PValueFDRadjusted	baseMean	baseMeanA	baseMeanB	No1	No2	No3	Ac1	Ac2	Ac3
Olfr145	-1.76388	1.72645e-13	1.87666e-10	269.019	404.156	133.883	526	473	275	254	63	82
Olfr30	-0.97445	4.1683e-07	0.000177313	151.304	196.274	106.335	253	203	163	163	85	62
Olfr109	-1.03911	4.89364e-07	0.000177313	207.39	273.465	141.315	280	329	259	208	91	114
Olfr1484	-1.05796	1.02937e-06	0.000237377	135.668	179.911	91.426	187	172	212	131	57	79
Olfr1501	-1.06803	1.09189e-06	0.000237377	97.3895	130.408	64.3706	120	156	139	67	57	60
Olfr1340	-0.914943	6.63648e-06	0.00120231	174.225	221.558	126.893	307	241	149	224	77	74
Olfr874	-0.997269	2.85883e-05	0.00443935	111.645	144.668	78.6212	203	134	118	137	38	58
Olfr1213	-1.41915	3.92273e-05	0.00533002	32.5303	47.1162	17.9444	30	55	66	15	15	21
Olfr889	-1.41384	9.77888e-05	0.0107394	25.6303	36.9766	14.2841	43	34	40	16	12	13
Olfr890	-1.78171	9.87989e-05	0.0107394	14.9397	23.0458	6.83354	26	17	30	10	4	6
Olfr1331	-1.16716	0.000115956	0.0114586	50.2086	68.7958	31.6214	62	91	66	39	28	24
Olfr983	-1.25675	0.000134277	0.0116834	37.2368	51.8092	22.6644	59	56	49	20	25	19
Olfr19	-1.08373	0.000139727	0.0116834	87.3157	117.424	57.2077	194	109	64	102	25	43
Olfr796	-0.662354	0.000239147	0.018568	155.787	187.853	123.722	210	190	195	157	92	109
Olfr1377	-1.04299	0.000270582	0.0196082	56.9142	75.5629	38.2656	101	84	53	60	27	25
Olfr1477	-0.689477	0.000339093	0.0218536	130.135	158.485	101.784	165	146	192	99	93	98
Olfr285	-0.495913	0.000341777	0.0218536	285.654	329.193	242.115	311	382	354	264	206	224
Olfr901	-1.51565	0.000472905	0.0275717	21.0078	31.0282	10.9874	25	43	31	15	7	10
Olfr923	-1.11816	0.000485268	0.0275717	88.433	115.368	61.4985	172	119	71	127	21	37
Olfr745	-0.975178	0.0005073	0.0275717	97.3114	127.738	66.885	188	134	79	105	33	59
Olfr556	-1.25362	0.000601065	0.0303173	36.8776	50.9483	22.8068	49	52	61	33	10	24
Olfr488	-0.723096	0.00063514	0.0303173	158.963	195.678	122.248	280	182	153	168	68	121
Olfr849	-0.583473	0.000641489	0.0303173	168.477	198.86	138.094	208	200	223	158	101	139
Olfr1467	-1.47593	0.000772431	0.0349847	19.2355	28.4016	10.0694	44	26	19	11	7	11
Olfr1370	-0.482723	0.000842165	0.0366174	225.767	259.072	192.461	259	262	302	213	152	188
Olfr750	-0.760522	0.000876248	0.0366339	89.8178	111.346	68.2898	120	120	113	80	50	67
Olfr716	-0.664476	0.000955191	0.0384553	116.099	140.122	92.0764	167	142	134	119	76	71
Olfr229	-1.07443	0.00103349	0.0398323	35.946	47.9597	23.9324	65	50	36	38	18	14
Olfr1178	0.498669	0.00106268	0.0398323	209.691	168.633	250.749	151	195	191	205	270	232
Olfr847	-1.04574	0.00132182	0.0478938	47.0553	62.0799	32.0307	90	63	42	57	16	22
Olfr628	1.37	0.00158848	0.0556994	17.3363	9.48554	25.187	11	13	6	26	22	24
Olfr694	-0.788069	0.00188085	0.0638903	81.354	101.019	61.6894	112	112	96	89	41	50
Olfr740	-0.568509	0.00221894	0.0707592	244.624	286.493	202.755	262	300	350	270	162	155
Olfr895	-0.870236	0.00225772	0.0707592	50.546	64.4746	36.6175	75	61	68	45	25	36
Olfr669	-0.630766	0.00227835	0.0707592	131.666	158.175	105.156	215	155	128	141	67	98
Olfr160	-0.997172	0.00248637	0.0750747	70.9479	92.0508	49.8451	122	106	62	87	21	40
Olfr376	-0.686361	0.00298698	0.0877527	103.613	126.789	80.4368	161	145	94	103	58	72
Olfr447	-1.0757	0.00323529	0.0902031	26.8757	36.2585	17.4929	51	41	22	26	13	12
Olfr821	-0.785027	0.00325964	0.0902031	64.831	80.7198	48.9422	86	83	87	63	33	46
Olfr62	-0.604936	0.00331934	0.0902031	116.493	138.69	94.2965	171	146	121	121	70	82
Olfr1156	-0.596358	0.00345094	0.0913401	131.618	156.595	106.642	200	164	130	135	74	100
Olfr935	-0.894644	0.00352924	0.0913401	44.545	57.4228	31.6672	62	72	48	36	26	29
Olfr1087	-1.03862	0.00366162	0.0925624	35.1635	47.1654	23.1616	44	69	37	29	17	21
Olfr478	-1.02495	0.00402036	0.0993213	45.1475	58.9607	31.3342	75	68	43	55	14	24
Olfr746	-3.19508	0.00421554	0.101829	2.08629	3.85475	0.317837	7	3	2	1	0	0
Olfr1104	-0.707003	0.00443815	0.104875	108.445	131.786	85.1033	139	153	126	114	50	84
Olfr1085	-1.02306	0.00484384	0.112027	42.1982	56.5112	27.8853	49	87	44	37	19	25
Olfr522	-0.371534	0.00510535	0.115615	278.78	309.34	248.22	356	310	313	299	192	225
Olfr523	-0.348455	0.00523676	0.116171	535.894	589.363	482.425	577	651	645	571	368	452
Olfr1047	-0.880415	0.00557318	0.120439	38.3325	49.0891	27.5758	74	42	38	44	17	20
Olfr1076	-2.23323	0.0057132	0.120439	3.874	6.41073	1.33726	11	7	2	3	1	0
Olfr610	-0.610763	0.00576155	0.120439	133.365	160.111	106.62	218	174	112	143	71	96
Olfr691	-0.64022	0.00615276	0.12439	101.314	122.483	80.146	174	128	83	116	52	66
Olfr47	-0.810748	0.00617945	0.12439	43.7157	55.0931	32.3384	68	54	52	37	26	30
Olfr870	-0.731172	0.00655439	0.128034	66.285	81.6767	50.8932	74	101	85	53	39	54
Olfr1502	-1.13454	0.00659606	0.128034	16.2107	22.1	10.3214	25	16	29	13	6	11
Olfr1350	-0.833184	0.00715123	0.136375	57.5355	72.2523	42.8186	66	78	86	62	28	35
Olfr43	-0.421853	0.00804546	0.144479	209.941	237.082	182.799	240	216	297	196	163	164
Olfr726	0.3647	0.00805935	0.144479	478.496	410.512	546.481	199	627	494	336	736	445
Olfr476	-0.910233	0.00821198	0.144479	32.7721	42.3064	23.2378	47	49	38	26	16	25
Olfr1491	-0.675069	0.00830985	0.144479	93.9339	113.368	74.4997	127	130	102	99	44	74
Olfr736	-0.942421	0.00833655	0.144479	28.9781	37.5486	20.4077	41	40	38	17	17	24
Olfr1014	-0.697182	0.00837365	0.144479	67.8597	82.512	53.2074	84	83	95	70	42	42
Olfr1124	-0.869414	0.00894653	0.151951	45.3857	56.9385	33.833	68	58	54	56	16	28
Olfr54	-0.538126	0.00921981	0.154184	128.586	150.367	106.805	196	168	110	152	76	83
Olfr143	-0.811658	0.00962698	0.156754	57.1202	71.0143	43.2261	78	82	65	67	24	36
Olfr1054	-1.03792	0.0096619	0.156754	32.674	43.2835	22.0646	49	56	32	34	10	21
Olfr251	-0.961781	0.0101293	0.159682	25.3362	32.8972	17.7752	39	39	26	28	13	11
Olfr1474	-0.742251	0.0101362	0.159682	63.3961	77.6959	49.0964	88	79	79	47	31	63
Olfr686	-0.594289	0.0104515	0.162297	100.066	118.447	81.6848	121	138	117	96	56	84
Olfr222	-0.368751	0.01139	0.173668	239.975	265.953	213.997	264	271	310	248	169	199
Olfr290	-0.365821	0.0115791	0.173668	250.819	277.781	223.856	269	313	301	251	183	209
Olfr693	-0.451579	0.0116631	0.173668	198.093	224.361	171.824	245	252	214	226	116	157
Olfr352	-0.997777	0.0121434	0.178244	19.9811	26.2952	13.6671	33	27	23	20	8	12
Olfr1428	-0.316218	0.0123826	0.178244	323.077	352.074	294.081	358	347	413	316	221	308
Olfr550	-0.609323	0.0124623	0.178244	79.79	95.4257	64.1542	85	87	132	64	58	61
Olfr449	-0.355658	0.0128769	0.179682	339.251	374.153	304.349	342	409	440	346	280	246
Olfr1469	-1.03312	0.0131289	0.179682	17.5822	23.4198	11.7447	28	33	13	17	11	6
Olfr497	-1.47773	0.0132122	0.179682	6.8872	10.0702	3.70422	10	9	13	6	1	4
Olfr805	-0.43529	0.0132241	0.179682	172.279	194.813	149.745	180	206	234	166	110	155
Olfr884	-0.639054	0.0134175	0.18006	139.671	165.814	113.528	199	198	127	177	59	98
Olfr279	-0.369514	0.0135971	0.180108	205.091	227.116	183.067	232	254	235	197	173	153
Olfr101	-0.567241	0.0137525	0.180108	82.4225	96.9829	67.8621	111	92	104	73	51	71
Olfr134	-0.73101	0.0145548	0.188193	75.6076	91.6134	59.6018	117	98	74	96	27	53
Olfr142	-0.702646	0.0150822	0.188193	69.9146	85.3062	54.523	97	104	69	75	33	51
Olfr738	-0.919083	0.0151248	0.188193	44.4998	56.8062	32.1933	75	62	42	49	12	34
Olfr262	-3.81043	0.0153968	0.188193	0.791804	1.58361	0	2	1	2	0	0	0
Olfr679	-0.684517	0.015498	0.188193	49.9848	60.7101	39.2594	71	73	48	44	41	27
Olfr121	-0.520365	0.0155287	0.188193	99.6141	115.659	83.5695	108	122	138	93	68	79
Olfr372	-1.37193	0.0155817	0.188193	14.1202	18.7544	9.48607	26	20	13	24	3	2
Olfr452	-0.55749	0.0165145	0.197266	80.2598	94.2335	66.286	111	102	85	81	55	55
Olfr1082	-1.08432	0.0180009	0.210366	15.1116	20.2351	9.98813	24	16	24	15	9	5
Olfr952	-3.74983	0.0181895	0.210366	0.780836	1.56167	0	1	3	1	0	0	0
Olfr136	-0.443295	0.0181917	0.210366	138.864	157.18	120.548	174	155	169	152	98	98
Olfr943	-0.710562	0.0188446	0.214975	43.5821	53.2773	33.8869	56	62	51	44	27	27
Olfr103	-0.804319	0.0189858	0.214975	33.9853	42.6738	25.2968	37	46	53	32	21	20
Olfr1018	-0.336245	0.0199072	0.223084	253.588	277.932	229.244	314	295	271	288	171	204
Olfr74	-1.96847	0.0203583	0.225811	3.35432	5.37138	1.33726	6	9	2	3	1	0
Olfr703	-0.767642	0.020614	0.226338	32.5088	40.2467	24.771	51	41	35	36	20	16
Olfr186	-0.461977	0.0213683	0.232273	117.307	133.991	100.623	143	119	163	118	77	95
Olfr988	-0.727252	0.0218533	0.235194	75.9221	93.6171	58.2271	149	98	46	104	26	43
Olfr453	-0.733614	0.022751	0.242454	33.563	41.3744	25.7516	47	39	45	30	22	22
Olfr713	-0.615012	0.0231011	0.243796	74.9268	88.367	61.4865	97	98	85	93	39	48
Olfr1309	-0.686578	0.0241999	0.251693	48.7584	58.7359	38.7808	53	70	64	41	45	24
Olfr378	-1.11137	0.0243125	0.251693	47.3551	64.0827	30.6275	34	52	120	55	14	22
Olfr316	-0.638465	0.0246042	0.252309	61.4721	73.7485	49.1956	78	59	97	38	47	54
Olfr1126	-0.505092	0.0248462	0.252409	85.0078	98.2989	71.7168	115	85	111	83	50	74
Olfr374	-0.400357	0.0251438	0.253068	308.018	340.163	275.873	347	359	374	391	163	252
Olfr1129	-0.481375	0.0257267	0.256559	117.681	135.726	99.6358	176	131	121	106	77	103
Olfr871	-1.79013	0.0268244	0.26309	3.19151	5.01024	1.37279	4	4	8	2	1	1
Olfr527	-0.300863	0.0268657	0.26309	384.801	416.146	353.456	427	451	443	448	271	303
Olfr845	-0.812266	0.0277035	0.267738	28.0268	35.0169	21.0367	38	36	37	24	11	26
Olfr25	-0.485536	0.0279703	0.267738	93.0745	106.95	79.1992	103	124	113	85	66	76
Olfr93	-0.552721	0.0280792	0.267738	90.5826	105.281	75.8846	98	112	125	89	43	88
Olfr129	-0.435824	0.0285256	0.268948	162.421	182.816	142.027	179	199	203	178	91	143
Olfr1062	-0.785129	0.0288566	0.268948	25.1564	31.4505	18.8624	30	38	32	19	15	20
Olfr150	-0.58517	0.0289484	0.268948	61.5597	73.2661	49.8532	96	60	75	55	42	46
Olfr974	-0.57095	0.0294781	0.271548	62.5241	73.609	51.4392	71	85	78	51	43	53
Olfr111	-0.669947	0.0299894	0.273937	41.1481	49.7466	32.5496	50	53	55	41	26	27
Olfr235	-0.324245	0.0304396	0.274959	223.999	243.976	204.023	232	243	301	199	144	242
Olfr203	-0.818072	0.0306072	0.274959	21.313	27.0046	15.6214	37	26	22	19	13	13
Olfr291	-0.276354	0.0313247	0.276622	419.014	450.992	387.035	443	535	455	455	326	332
Olfr429	-0.59907	0.0316383	0.276622	50.9274	60.3888	41.466	58	68	66	39	38	41
Olfr1234	-0.537456	0.0318625	0.276622	89.0917	102.959	75.2246	116	114	96	111	47	62
Olfr727	0.331315	0.0319759	0.276622	1570.26	1367.85	1772.67	716	1859	1820	1245	2346	1349
Olfr1448	-0.389167	0.0322256	0.276622	188.643	212.143	165.144	273	241	155	212	124	142
Olfr411	-0.416551	0.0325528	0.276622	124.714	141.102	108.325	207	150	86	161	90	64
Olfr137	-0.946075	0.0325737	0.276622	14.9013	19.4101	10.3924	15	22	25	11	6	13
Olfr1049	-1.092	0.0329887	0.277974	11.9663	15.9916	7.94089	13	26	12	3	9	10
Olfr765	-0.856827	0.0332692	0.278182	16.9895	21.6374	12.3416	18	28	23	11	12	12
Olfr1512	-0.596455	0.0339638	0.281821	54.4536	64.8682	44.0391	78	73	54	47	39	40
Olfr288	1.90001	0.0347578	0.283127	8.93611	4.92716	12.9451	0	16	0	0	19	16
Olfr1506	-1.9032	0.03488	0.283127	3.83062	6.15662	1.50462	0	18	2	0	3	1
Olfr739	-0.546778	0.03509	0.283127	100.564	119.565	81.5627	180	132	63	125	51	63
Olfr472	-0.376953	0.035163	0.283127	168.352	186.573	150.13	195	194	203	179	103	152
Olfr630	-0.716677	0.0358506	0.286541	41.7656	51.6122	31.919	89	52	20	61	17	17
Olfr95	-0.378934	0.036289	0.286831	153.053	170.339	135.767	159	176	207	142	122	124
Olfr1145	-3.40138	0.0366922	0.286831	0.614146	1.22829	0	0	1	3	0	0	0
Olfr1065	-0.527468	0.0367899	0.286831	84.9285	98.8231	71.0338	123	105	84	88	45	73
Olfr495	-0.798053	0.0369423	0.286831	41.8451	50.3827	33.3076	64	44	51	54	8	37
Olfr1463	-0.260542	0.0373951	0.288287	415.257	443.971	386.543	461	453	495	468	325	320
Olfr239	-0.235745	0.0398499	0.303093	432.323	458.864	405.783	480	465	511	403	324	434
Olfr1449	-0.823773	0.0401118	0.303093	23.8958	30.3239	17.4676	34	41	21	25	11	15
Olfr147	-0.534778	0.0401522	0.303093	81.0454	95.1365	66.9543	136	93	70	90	41	64
Olfr830	-1.44244	0.0416197	0.31013	4.56781	6.73828	2.39735	12	4	5	3	1	3
Olfr133	-0.523273	0.0417679	0.31013	73.1521	84.9242	61.3799	120	87	60	96	39	45
Olfr1395	-0.252357	0.0419765	0.31013	350.387	374.138	326.635	367	402	420	339	261	336
Olfr462	-0.504114	0.0422409	0.31013	68.7075	79.3672	58.0478	94	72	85	73	42	53
Olfr1510	-0.497979	0.0425109	0.31013	82.2278	94.9198	69.5358	114	102	84	83	48	70
Olfr1012	-0.367995	0.0429568	0.311294	138.568	153.902	123.235	179	133	175	140	91	124
Olfr782	-1.21734	0.0433784	0.312267	7.32332	9.93326	4.71338	17	9	5	10	4	0
Olfr922	-0.887326	0.04402	0.314801	22.7257	29.2366	16.2149	40	36	16	27	7	14
Olfr209	-0.524329	0.0453258	0.322021	63.8201	74.1029	53.5373	79	79	77	59	40	55
Olfr1105	-0.678534	0.0458666	0.322861	29.1246	35.3699	22.8793	40	34	38	27	17	22
Olfr547	-2.02906	0.0460381	0.322861	1.93251	3.19382	0.671197	5	4	1	1	0	1
Olfr366	-0.664861	0.0464101	0.323383	36.8425	44.4574	29.2277	47	52	42	39	19	27
Olfr675	-0.489569	0.0472748	0.327165	94.8574	110.159	79.5561	160	111	75	111	50	71
Olfr645	-0.800921	0.0475548	0.327165	20.6884	25.7283	15.6484	48	18	14	33	7	7
Olfr530	-0.510179	0.0481775	0.329365	89.233	102.581	75.8846	88	110	129	89	43	88
Olfr27	-0.800369	0.0485167	0.329454	20.449	25.6804	15.2175	33	26	22	17	9	18
Olfr69	-0.592898	0.0490444	0.329454	66.9695	78.7463	55.1927	106	79	63	80	26	56
Olfr971	-0.825592	0.0490999	0.329454	27.8035	34.386	21.2209	37	42	30	37	9	17
Olfr57	-0.48979	0.0494221	0.329582	70.5194	81.7094	59.3294	115	65	77	75	40	57
Olfr205	-0.573372	0.0509511	0.337706	46.7715	55.0625	38.4806	54	56	65	44	27	40
Olfr485	-1.80232	0.0526817	0.341433	2.40302	3.78661	1.01943	4	7	1	2	1	0
Olfr667	-0.614373	0.0530846	0.341433	69.9712	83.5745	56.3679	115	86	62	62	32	69
Olfr122	-0.461256	0.0531265	0.341433	73.956	84.3342	63.5778	83	88	97	66	53	63
Olfr715	-0.439129	0.0531519	0.341433	88.3369	99.8617	76.8121	116	89	111	103	55	65
Olfr609	-0.440474	0.0533501	0.341433	143.341	162.754	123.929	200	184	130	150	79	130
Olfr1013	-0.473269	0.0535839	0.341433	99.5961	113.265	85.927	123	125	111	86	56	105
Olfr1505	-0.569643	0.0537121	0.341433	51.8242	61.0088	42.6396	71	66	56	48	29	46
Olfr936	-1.73575	0.0553668	0.349905	2.26001	3.5006	1.01943	5	4	2	2	1	0
Olfr202	-1.16485	0.0558319	0.350805	7.97424	11.1893	4.75917	18	13	4	7	2	5
Olfr1134	-0.584055	0.0562195	0.351211	45.1343	53.0305	37.2381	59	51	58	44	21	43
Olfr1380	-0.35559	0.0578494	0.359069	132.206	145.382	119.03	155	167	139	134	120	86
Olfr776	-0.279041	0.0581382	0.359069	235.77	253.668	217.872	264	259	282	248	157	223
Olfr12	-0.290936	0.05876	0.360859	209.725	226.48	192.971	232	235	252	207	185	159
Olfr1378	-0.73281	0.0595531	0.363675	23.5726	28.9153	18.23	27	31	34	26	14	13
Olfr1339	-0.492136	0.0600499	0.364621	79.9401	92.8875	66.9927	131	110	51	104	47	45
Olfr55	-0.192346	0.0603788	0.364621	606.135	634.92	577.349	671	668	675	637	499	519
Olfr61	-0.409697	0.0610541	0.366662	96.9869	108.991	84.9829	99	116	132	93	68	83
Olfr1494	-0.424633	0.0626604	0.373862	86.0297	96.8142	75.2453	104	93	110	84	51	82
Olfr910	-0.536098	0.0629408	0.373862	72.1937	83.9087	60.4788	77	111	79	85	43	48
Olfr1133	-0.915622	0.063935	0.376044	14.8689	18.7117	11.0262	24	25	10	23	6	4
Olfr380	-0.465966	0.0641749	0.376044	69.3035	79.2926	59.3144	104	63	83	72	36	64
Olfr455	-0.182822	0.0648561	0.376044	678.408	707.685	649.13	667	801	783	634	625	588
Olfr705	-0.226712	0.0649619	0.376044	348.11	368.744	327.476	399	372	398	350	255	335
Olfr731	0.287829	0.0650379	0.376044	205.628	181.49	229.766	162	205	211	241	203	213
Olfr1045	-0.454944	0.0656071	0.377328	120.87	138.814	102.926	202	133	101	129	61	109
Olfr649	-0.534759	0.0662518	0.37903	79.3151	94.1359	64.4943	145	100	50	97	38	54
Olfr846	-0.880773	0.0674439	0.382308	11.0297	14.1405	7.91889	13	17	15	11	6	6
Olfr615	-0.345235	0.0675282	0.382308	293.612	326.984	260.239	475	337	215	361	160	238
Olfr969	-0.292126	0.0679377	0.382634	335.426	364.973	305.879	485	347	318	336	214	331
Olfr525	-0.321358	0.0686696	0.384762	153.149	167.289	139.008	159	191	182	142	124	131
Olfr1167	-0.783382	0.0704453	0.392083	27.6135	34.5351	20.6918	43	45	21	32	9	20
Olfr114	-0.767596	0.0710218	0.392083	18.1569	22.5808	13.733	19	27	26	19	9	12
Olfr1135	-0.650875	0.071283	0.392083	26.8948	32.4793	21.3103	35	27	41	24	20	17
Olfr1009	-0.476639	0.071419	0.392083	86.8519	99.6048	74.099	143	96	74	106	39	72
Olfr881	-0.736028	0.071854	0.392489	29.9963	36.6618	23.3308	42	48	26	39	11	19
Olfr437	-0.40703	0.0722966	0.392932	89.0991	100.577	77.6217	132	106	79	97	63	64
Olfr194	-0.630666	0.0730403	0.394999	25.0645	30.0967	20.0323	38	26	31	25	14	19
Olfr1383	-0.480437	0.0739186	0.397097	91.3152	104.567	78.0634	133	87	110	59	68	94
Olfr1239	-0.459773	0.0741588	0.397097	71.0574	81.1134	61.0014	89	95	73	72	45	59
Olfr313	-0.632978	0.0751421	0.40039	36.9857	44.2754	29.696	52	55	33	44	17	26
Olfr198	-0.682728	0.0765469	0.404611	18.6511	22.6952	14.6071	24	21	27	16	11	15
Olfr92	-0.460605	0.0766788	0.404611	61.1863	69.7519	52.6208	64	80	78	51	47	52
Olfr578	-0.352118	0.0776281	0.407641	214.632	236.662	192.601	323	233	189	251	108	202
Olfr1271	-0.31253	0.0781141	0.408221	172.567	188.018	157.117	203	214	179	185	119	149
Olfr390	-0.228959	0.0791296	0.410545	288.571	306.228	270.914	342	301	327	279	241	254
Olfr1026	-0.553697	0.0796404	0.410545	37.9681	44.4533	31.4829	60	41	39	46	20	26
Olfr1231	-0.390806	0.0802662	0.410545	85.8116	95.888	75.7352	104	88	112	87	59	72
Olfr9	-0.523701	0.0804746	0.410545	47.5647	55.4265	39.7029	69	56	50	42	30	42
Olfr1016	-0.350302	0.0807702	0.410545	111.327	122.743	99.9112	122	118	150	96	86	103
Olfr855	-0.437858	0.0808248	0.410545	66.7433	75.6079	57.8787	78	75	87	63	48	55
Olfr1270	-0.369518	0.0815351	0.412226	110.108	122.175	98.0415	110	144	135	102	78	101
Olfr876	-0.483505	0.0826362	0.415859	57.5135	65.652	49.375	73	60	75	69	31	44
Olfr960	-0.5938	0.084072	0.419729	34.9255	41.1694	28.6817	51	43	36	41	15	28
Olfr1424	-0.734246	0.0845006	0.419729	40.1858	47.7384	32.6331	43	55	54	44	9	43
Olfr632	-0.325342	0.0845917	0.419729	188.368	207.003	169.733	291	194	166	224	103	167
Olfr225	-1.03635	0.0852132	0.419729	7.03251	9.62881	4.4362	17	11	2	7	3	3
Olfr730	0.225575	0.0857192	0.419729	504.498	454.107	554.889	472	498	471	615	397	586
Olfr924	-0.422697	0.0858843	0.419729	111.752	126.493	97.0106	175	126	97	123	57	102
Olfr1218	-0.60368	0.0861082	0.419729	30.6342	36.411	24.8574	32	41	43	31	17	24
Olfr566	-0.28086	0.0870483	0.42032	245.099	265.566	224.633	336	282	220	270	161	218
Olfr1181	1.12649	0.087124	0.42032	5.53782	3.43246	7.64318	2	8	1	4	12	5
Olfr1196	0.366967	0.0873894	0.42032	184.675	156.337	213.014	138	181	179	273	131	215
Olfr1189	-0.612957	0.0889649	0.425675	27.8028	32.9086	22.697	40	28	36	27	11	28
Olfr1444	-0.56623	0.0895083	0.425675	52.2989	62.4723	42.1254	93	74	29	69	25	30
Olfr1480	-0.714447	0.0899898	0.425675	14.1126	17.2615	10.9636	15	21	19	10	12	9
Olfr541	-0.241305	0.0902301	0.425675	277.091	295.03	259.152	272	310	357	284	197	264
Olfr1311	0.440923	0.0904607	0.425675	64.656	54.4187	74.8933	79	36	56	103	50	65
Olfr569	-0.466284	0.0923126	0.428909	81.7132	94.1123	69.3142	131	108	57	104	42	57
Olfr1153	-0.994457	0.0928739	0.428909	7.88075	10.1199	5.64163	12	10	10	12	2	3
Olfr825	-0.605182	0.0928842	0.428909	26.9645	32.064	21.865	30	38	34	24	15	24
Olfr152	-0.370528	0.0930773	0.428909	102.185	114.025	90.3441	155	111	93	116	62	84
Olfr584	-0.410943	0.0931211	0.428909	104.944	119.26	90.6282	168	120	87	108	62	92
Olfr90	-0.398332	0.0935805	0.429207	77.9264	87.142	68.7109	98	79	99	69	51	77
Olfr564	2.73977	0.0942876	0.430633	0.368556	0	0.737113	0	0	0	0	1	1
Olfr1269	-0.700541	0.0951572	0.431951	27.2634	32.9151	21.6116	27	41	37	26	9	28
Olfr1217	-0.362886	0.095517	0.431951	119.225	132.003	106.447	135	159	125	124	78	105
Olfr1176	-0.303936	0.0957683	0.431951	184.507	203.178	165.835	284	217	138	215	127	138
Olfr967	-0.805506	0.0964079	0.431968	17.3576	21.594	13.1211	29	25	14	22	4	13
Olfr441	-0.64405	0.0971048	0.431968	48.6468	59.1595	38.1341	83	72	31	56	18	38
Olfr18	-0.787942	0.097742	0.431968	13.2878	16.8646	9.71095	11	27	16	12	8	8
Olfr1414	-0.325464	0.0978033	0.431968	175.727	189.516	161.938	151	213	241	122	204	127
Olfr1406	-0.243998	0.0979523	0.431968	253	271.944	234.056	386	239	230	304	162	213
Olfr370	-0.245983	0.0981565	0.431968	236.523	251.855	221.191	252	270	278	241	165	230
Olfr13	-0.466027	0.0998422	0.435368	56.7249	64.5007	48.9492	63	70	72	52	32	57
Olfr1355	-1.37206	0.100421	0.435368	3.27042	4.85022	1.69062	10	5	0	3	1	1
Olfr479	-0.435707	0.101265	0.435368	64.6784	73.1589	56.1979	65	87	81	64	52	45
Olfr414	-0.262644	0.101643	0.435368	180.978	194.027	167.928	172	225	221	161	156	161
Olfr728	0.153387	0.101894	0.435368	935.275	867.342	1003.21	840	996	921	969	889	1002
Olfr1387	-0.274882	0.102008	0.435368	169.387	182.106	156.667	201	185	191	192	124	136
Olfr725	0.706376	0.102015	0.435368	49.158	39.5321	58.7839	8	60	60	45	80	39
Olfr1344	-0.420755	0.102206	0.435368	116.101	129.46	102.742	119	153	140	145	62	93
Olfr464	-0.369081	0.102534	0.435368	101.035	111.796	90.275	126	118	110	85	70	103
Olfr1094	-0.530509	0.103607	0.438215	39.5773	46.167	32.9876	54	57	35	46	23	27
Olfr1109	-0.700326	0.105948	0.446376	18.4443	22.7311	14.1574	25	31	16	17	9	15
Olfr502	-0.3856	0.10644	0.446719	77.9922	87.0221	68.9624	92	101	83	77	57	64
Olfr1347	-0.294066	0.107682	0.450193	178.885	192.665	165.105	167	213	234	155	184	128
Olfr902	1.09152	0.108551	0.451245	5.90603	3.78661	8.02546	4	7	1	8	6	9
Olfr73	-0.392515	0.109056	0.451245	77.9754	86.6365	69.3142	115	81	77	104	42	57
Olfr362	-0.326277	0.10944	0.451245	111.542	121.919	101.166	139	110	137	130	74	89
Olfr8	0.417768	0.109738	0.451245	63.4812	53.6157	73.3466	71	40	58	86	49	77
Olfr531	-0.186303	0.110009	0.451245	481.944	503.753	460.136	493	542	566	503	369	449
Olfr173	-0.332644	0.110859	0.45222	135.553	147.463	123.643	153	151	164	168	79	113
Olfr898	-0.8342	0.111079	0.45222	7.98417	10.1187	5.84964	12	9	11	7	3	7
Olfr594	-0.306238	0.11223	0.455203	158.441	172.639	144.242	216	173	156	164	101	151
Olfr1040	-2.6391	0.112841	0.455942	0.318915	0.63783	0	1	0	1	0	0	0
Olfr365	-0.272438	0.113252	0.455942	225.455	242.533	208.377	209	274	290	245	155	201
Olfr248	-1.99981	0.113712	0.456105	0.962856	1.60788	0.317837	3	1	1	1	0	0
Olfr798	-0.465841	0.115001	0.459581	50.8907	58.1714	43.61	68	63	53	44	33	48
Olfr1162	-0.256653	0.11578	0.460999	223.533	239.498	207.568	287	257	213	251	147	202
Olfr568	-1.35403	0.119087	0.472437	2.42091	3.49943	1.34239	5	3	3	2	0	2
Olfr1240	-0.188587	0.120896	0.477869	383.09	401.016	365.164	373	438	465	378	307	360
Olfr113	-0.652393	0.122308	0.481699	19.4887	23.4508	15.5265	30	18	26	16	18	10
Olfr44	-0.418321	0.123721	0.484031	55.1805	62.0868	48.2743	65	63	69	48	40	50
Olfr749	-0.428834	0.123791	0.484031	84.1072	94.9978	73.2166	130	99	70	101	39	74
Olfr1020	-0.334327	0.124519	0.485135	156.692	173.016	140.367	231	184	130	175	91	141
Olfr1308	-0.425134	0.125338	0.486582	61.3526	68.9394	53.7658	82	61	75	50	37	67
Olfr508	-0.589934	0.126243	0.488348	31.2821	38.1363	24.4279	52	52	16	34	18	19
Olfr598	-0.355196	0.126993	0.489509	170.82	187.892	153.749	236	209	148	201	85	162
Olfr689	-0.282457	0.128958	0.49437	217.523	237.106	197.939	315	254	178	231	144	196
Olfr491	-0.362917	0.129164	0.49437	80.9719	89.9026	72.0412	110	92	82	79	56	72
Olfr308	-0.286452	0.129917	0.49551	153.151	164.819	141.482	172	170	181	182	101	127
Olfr119	-0.394651	0.130447	0.495791	62.1096	69.4988	54.7204	79	77	64	55	51	50
Olfr76	-0.412014	0.130917	0.495842	87.2989	97.001	77.5967	98	115	95	113	46	68
Olfr1396	-0.194805	0.132458	0.498505	307.652	322.741	292.563	313	332	381	317	242	280
Olfr1272	-0.928285	0.132537	0.498505	7.72759	10.2412	5.21397	17	10	5	5	3	7
Olfr417	0.301613	0.133156	0.498915	128.904	113.251	144.557	97	128	136	158	116	141
Olfr120	-0.429916	0.133564	0.498915	45.9847	51.871	40.0984	49	54	62	36	36	42
Olfr331	-2.50723	0.134301	0.499011	0.306782	0.613563	0	0	0	2	0	0	0
Olfr1183	-0.306536	0.134818	0.499011	156.98	168.262	145.698	82	260	199	83	217	102
Olfr853	1.15232	0.134967	0.499011	3.17207	1.86729	4.47685	1	2	3	5	2	6
Olfr63	-0.331128	0.135692	0.499991	140.312	152.504	128.12	145	168	172	173	81	119
Olfr711	-0.211923	0.137027	0.50243	296.571	312.949	280.193	263	342	393	270	280	246
Olfr1282	-2.4802	0.137781	0.50243	0.307948	0.615895	0	0	2	0	0	0	0
Olfr773	-2.4802	0.137781	0.50243	0.307948	0.615895	0	0	2	0	0	0	0
Olfr3	-0.431647	0.138203	0.50243	47.3219	53.773	40.8709	77	50	42	58	29	32
Olfr1446	-0.455195	0.13967	0.506071	66.5437	75.8964	57.191	76	101	64	63	37	65
Olfr1034	-0.304167	0.141211	0.507291	163.282	178.482	148.081	241	191	130	200	95	136
Olfr446	-0.272451	0.142063	0.507291	219.175	237.493	200.857	305	268	176	254	139	189
Olfr724	-0.569356	0.142102	0.507291	27.7168	33.2241	22.2096	53	28	23	22	24	17
Olfr786	-0.258339	0.142505	0.507291	241.549	257.84	225.257	232	294	295	278	156	218
Olfr813	-0.42084	0.142515	0.507291	89.0214	102.412	75.6305	144	115	63	80	59	78
Olfr67	-0.278485	0.143156	0.507291	190.578	206.274	174.882	285	220	144	255	111	145
Olfr97	-0.373384	0.143274	0.507291	84.6749	94.1559	75.194	83	92	125	94	61	62
Olfr638	-0.652276	0.146019	0.514695	20.551	24.9531	16.149	41	25	12	28	6	14
Olfr706	-0.218958	0.146482	0.514695	253.146	267.485	238.807	301	289	257	280	174	235
Olfr397	-0.490903	0.147017	0.514695	44.0721	51.0046	37.1396	63	72	26	61	26	22
Olfr951	-0.807529	0.148137	0.514695	7.49596	9.46011	5.5318	10	12	8	6	3	7
Olfr1413	-0.759753	0.148285	0.514695	8.28009	10.3319	6.22826	8	12	13	8	5	5
Olfr998	-0.790467	0.148528	0.514695	7.56187	9.46011	5.66363	10	12	8	4	5	7
Olfr557	-0.366423	0.148679	0.514695	90.1455	100.591	79.6997	119	126	73	103	57	71
Olfr1461	-0.427825	0.149592	0.516211	49.1947	55.1122	43.2771	56	57	62	40	29	55
Olfr1220	0.511093	0.153363	0.52755	37.1008	30.6071	43.5946	20	49	29	47	36	42
Olfr1386	-0.224426	0.154645	0.529453	289.684	306.664	272.704	319	364	290	322	199	266
Olfr1143	-0.345116	0.155849	0.529453	75.854	83.523	68.1851	75	85	106	73	50	73
Olfr1466	-0.372533	0.156233	0.529453	64.5357	71.9451	57.1262	78	91	59	66	50	48
Olfr1029	-0.466304	0.156774	0.529453	55.1908	63.8671	46.5144	74	87	41	60	31	44
Olfr933	-0.383855	0.157076	0.529453	66.2438	73.7314	58.7563	102	71	59	86	34	52
Olfr211	-0.169904	0.157524	0.529453	543.627	566.481	520.772	481	653	672	538	475	474
Olfr346	-0.375949	0.158163	0.529453	76.9343	85.298	68.5706	97	97	76	86	43	70
Olfr1508	0.239971	0.158611	0.529453	689.518	618.252	760.784	276	908	806	458	1105	541
Olfr859	-0.296527	0.159066	0.529453	113.16	122.903	103.418	102	145	145	105	84	107
Olfr1437	-0.237657	0.159185	0.529453	214.372	226.915	201.829	224	248	249	215	137	229
Olfr392	-0.490139	0.159996	0.529453	92.9544	104.555	81.3536	92	141	100	128	36	76
Olfr1015	-0.209604	0.160055	0.529453	209.896	221.117	198.676	226	233	243	214	160	196
Olfr166	-0.136538	0.160249	0.529453	789.458	810.356	768.56	759	904	915	738	758	688
Olfr448	-0.354775	0.161186	0.529751	93.1121	103.413	82.8112	149	80	96	89	50	100
Olfr1389	-0.243932	0.161313	0.529751	276.109	297.749	254.469	422	309	205	343	170	227
Olfr17	-0.183305	0.162389	0.531617	323.282	337.91	308.655	341	393	339	337	260	288
Olfr1173	-0.446966	0.16286	0.531617	70.4278	79.2606	61.5949	101	98	51	103	31	48
Olfr1168	-0.358566	0.164062	0.53394	69.1047	76.1596	62.0497	88	77	76	78	40	62
Olfr1097	-0.206096	0.165976	0.537519	208.372	219.634	197.11	254	220	221	220	162	184
Olfr913	-0.450504	0.166172	0.537519	46.8352	53.0613	40.6091	47	64	58	52	25	41
Olfr490	-0.86398	0.166827	0.537519	11.4387	15.1157	7.76179	28	15	4	12	2	9
Olfr1055	-0.672041	0.168551	0.537519	10.8398	13.3415	8.33816	18	17	7	10	7	7
Olfr1219	-0.289487	0.168712	0.537519	143.756	153.851	133.66	163	160	165	187	82	121
Olfr702	-0.406321	0.169329	0.537519	47.6263	53.2402	42.0123	55	51	63	54	27	41
Olfr146	-0.357317	0.169354	0.537519	86.3927	94.7339	78.0515	106	109	85	111	47	70
Olfr819	-0.399536	0.169707	0.537519	67.2321	77.0894	57.3748	113	91	38	82	42	43
Olfr554	-0.424836	0.170067	0.537519	48.0317	54.7222	41.3411	78	54	40	53	27	40
Olfr52	-0.325266	0.170107	0.537519	86.6203	95.4278	77.8128	122	108	71	99	60	66
Olfr768	-0.546759	0.170872	0.538372	20.5499	23.7438	17.3559	29	27	19	29	12	10
Olfr699	-0.397126	0.172889	0.539601	46.6376	52.2285	41.0467	77	41	46	63	29	28
Olfr196	-0.35469	0.173242	0.539601	63.919	70.4815	57.3565	82	68	73	70	39	57
Olfr906	1.06573	0.173816	0.539601	4.4624	2.9078	6.01699	6	1	2	4	5	8
Olfr633	-0.300671	0.173894	0.539601	116.203	128.16	104.247	180	136	87	124	87	89
Olfr810	-0.261675	0.174344	0.539601	180.841	194.411	167.272	239	212	163	195	116	172
Olfr558	-0.32104	0.174529	0.539601	92.7177	102.432	83.003	132	119	72	99	68	72
Olfr487	-0.546099	0.174737	0.539601	21.6462	24.8947	18.3977	26	24	29	17	9	27
Olfr131	-0.225123	0.17582	0.541406	178.515	188.826	168.203	186	209	205	166	136	179
Olfr978	-0.678491	0.176518	0.54202	11.1717	13.5015	8.84201	12	16	15	14	5	7
Olfr1385	-0.302298	0.177145	0.542413	108.089	117.527	98.65	108	146	120	113	76	95
Olfr467	-0.440694	0.179291	0.547441	32.9228	37.3198	28.5257	57	37	23	44	25	14
Olfr1112	-0.274265	0.180664	0.549916	116.995	125.542	108.449	136	122	140	133	73	108
Olfr1036	-0.317066	0.181113	0.549916	111.962	124.149	99.7742	166	145	80	122	77	89
Olfr984	-0.25441	0.183444	0.552725	169.417	180.26	158.573	175	195	203	190	103	166
Olfr605	-0.403852	0.183717	0.552725	62.902	70.8347	54.9694	83	87	54	65	36	58
Olfr46	-0.241027	0.184073	0.552725	145.499	155.041	135.957	149	156	188	148	112	130
Olfr356	-0.869022	0.184179	0.552725	4.87201	6.29173	3.4523	6	9	5	4	2	4
Olfr332	-0.162893	0.184581	0.552725	459.862	476.828	442.896	535	519	456	538	331	410
Olfr197	-1.09492	0.187083	0.558679	3.0467	4.11533	1.97807	5	5	3	4	0	2
Olfr1459	-0.304589	0.18785	0.559432	100.188	108.848	91.5276	105	132	109	106	66	92
Olfr914	-0.358172	0.188765	0.559885	59.1464	65.2356	53.0573	68	70	69	60	37	56
Olfr424	-0.33595	0.189032	0.559885	85.4458	94.9349	75.9566	140	100	58	112	49	61
Olfr592	0.254265	0.190141	0.561638	408.055	366.298	449.812	500	382	271	558	268	480
Olfr353	-0.497196	0.19094	0.562471	34.4326	39.4973	29.3679	33	36	57	45	19	22
Olfr1140	-0.326439	0.1922	0.563774	98.0122	106.288	89.7364	115	96	126	67	101	84
Olfr358	-0.344092	0.192449	0.563774	79.4823	87.7651	71.1994	97	108	73	72	55	77
Olfr1106	-0.413161	0.193791	0.563774	55.6777	62.1712	49.1842	68	73	56	61	27	55
Olfr1051	0.447976	0.194208	0.563774	29.4451	24.4486	34.4416	33	22	22	44	22	34
Olfr677	-0.438238	0.194877	0.563774	108.562	122.686	94.4378	169	143	74	132	41	104
Olfr318	0.208903	0.194987	0.563774	176.878	160.662	193.093	165	171	174	195	175	181
Olfr33	-0.366447	0.195013	0.563774	73.6846	81.3278	66.0414	85	99	74	85	40	67
Olfr398	-0.250062	0.198263	0.571651	129.442	138.111	120.773	134	156	149	140	103	104
Olfr1394	-0.4161	0.201613	0.57861	42.1439	47.3202	36.9676	51	56	43	36	26	44
Olfr434	-0.562787	0.201988	0.57861	21.6691	25.455	17.8832	24	20	37	21	20	10
Olfr38	-0.968886	0.202873	0.57861	6.20629	7.53846	4.87413	7	5	12	12	0	3
Olfr1451	-0.533467	0.203476	0.57861	19.5641	22.3219	16.8063	34	19	17	28	16	5
Olfr690	-0.310854	0.204112	0.57861	144.884	160.891	128.876	238	164	103	156	86	131
Olfr1101	-0.434943	0.20532	0.57861	30.142	34.0977	26.1863	38	37	33	26	20	29
Olfr601	-0.294254	0.205457	0.57861	117.619	127.603	107.635	157	137	109	117	74	119
Olfr204	-0.334603	0.205542	0.57861	60.0293	65.8249	54.2338	67	70	72	61	42	53
Olfr1136	1.68976	0.205842	0.57861	0.834157	0.331049	1.33726	1	0	0	3	1	0
Olfr744	-0.468238	0.206	0.57861	43.9506	51.4512	36.4501	69	67	26	48	23	35
Olfr714	-0.428891	0.207212	0.580514	33.2126	37.4597	28.9655	37	47	35	39	22	23
Olfr305	-0.380454	0.208263	0.581957	52.6384	58.0524	47.2244	63	65	56	69	30	39
Olfr1138	-0.684581	0.208915	0.582284	8.76975	10.6653	6.8742	9	14	11	8	3	9
Olfr371	-0.736234	0.210471	0.585002	6.18804	7.59166	4.78443	9	9	6	8	4	2
Olfr135	-0.47735	0.210967	0.585002	22.5691	25.6065	19.5317	30	25	26	30	15	12
Olfr851	-0.224646	0.212303	0.587209	157.943	167.396	148.49	176	192	163	161	121	144
Olfr141	-0.368504	0.213914	0.587862	47.8872	52.9965	42.7779	70	56	41	64	29	32
Olfr1341	-0.236379	0.214302	0.587862	139.37	148.185	130.555	145	148	178	150	111	114
Olfr723	-0.323382	0.21461	0.587862	63.6937	69.6998	57.6876	62	77	83	61	51	53
Olfr48	-0.237397	0.214702	0.587862	148.481	156.76	140.203	130	184	186	121	162	112
Olfr151	-1.64828	0.216811	0.590707	0.785198	1.25256	0.317837	1	1	2	1	0	0
Olfr295	0.27192	0.216828	0.590707	165.54	145.168	185.912	159	163	138	181	120	233
Olfr824	-0.355048	0.217505	0.590946	78.7292	85.9307	71.5278	85	100	88	88	38	82
Olfr1276	0.349419	0.218172	0.590946	72.9528	63.091	82.8146	30	74	99	49	108	73
Olfr698	-0.364713	0.219768	0.590946	55.803	61.6496	49.9565	59	76	61	66	35	44
Olfr350	-0.431046	0.219803	0.590946	33.7383	37.8092	29.6675	39	42	39	34	16	36
Olfr330	-0.164439	0.219935	0.590946	347.205	359.904	334.506	377	352	413	366	319	271
Olfr1361	-0.278437	0.220178	0.590946	139.399	150.413	128.385	198	166	110	182	77	116
Olfr930	-0.739801	0.220809	0.591182	6.98702	8.58947	5.38458	12	13	2	11	4	1
Olfr597	-0.379706	0.221543	0.591393	55.5143	62.5531	48.4756	97	60	39	71	27	44
Olfr304	-0.828191	0.221977	0.591393	8.19437	9.72069	6.66806	8	14	9	3	2	14
Olfr769	-0.304152	0.223472	0.593173	75.3008	81.8674	68.7343	82	98	80	80	53	65
Olfr155	0.31911	0.223933	0.593173	77.4553	66.8821	88.0284	60	70	83	103	52	100
Olfr1277	0.356079	0.224314	0.593173	78.934	68.188	89.6799	37	90	92	78	112	62
Olfr1100	-0.278259	0.224827	0.593173	82.0163	88.3311	75.7015	96	88	96	78	59	80
Olfr1281	0.247623	0.225446	0.593365	245.596	219.819	271.373	107	281	319	171	374	208
Olfr1420	-0.176288	0.226584	0.59379	234.406	243.996	224.816	258	245	271	272	181	195
Olfr544	-0.167147	0.2267	0.59379	237.883	247.992	227.773	322	236	224	286	190	181
Olfr532	-0.142459	0.227902	0.595502	391.221	402.614	379.829	414	429	435	405	356	324
Olfr165	-0.418711	0.230407	0.597103	46.038	51.6342	40.4418	39	59	67	55	23	40
Olfr368	-0.366825	0.230748	0.597103	47.275	52.2096	42.3404	63	53	49	53	25	45
Olfr775	0.341363	0.230782	0.597103	150.502	134.917	166.087	205	149	69	209	105	168
Olfr1164	-1.1076	0.230884	0.597103	2.09637	2.88587	1.30687	5	3	1	3	0	1
Olfr818	-0.382286	0.231261	0.597103	42.7212	47.4825	37.9599	45	57	49	47	25	38
Olfr297	-0.246537	0.232009	0.597615	113.662	120.642	106.683	124	116	143	104	74	128
Olfr800	-0.36716	0.234504	0.602354	36.4303	40.3652	32.4954	43	46	39	36	30	27
Olfr503	1.91273	0.234957	0.602354	0.191876	0	0.383753	0	0	0	0	1	0
Olfr231	-0.250623	0.23798	0.607098	112.696	121.242	104.15	161	124	97	129	78	94
Olfr433	-0.323296	0.238116	0.607098	86.2869	94.4797	78.0941	121	105	72	99	46	82
Olfr456	1.89267	0.239041	0.607098	0.17668	0	0.35336	0	0	0	0	0	1
Olfr504	1.89267	0.239041	0.607098	0.17668	0	0.35336	0	0	0	0	0	1
Olfr480	-0.723973	0.239971	0.607851	6.32477	7.70949	4.94004	14	6	4	11	1	3
Olfr938	-0.599079	0.240456	0.607851	10.3258	12.5112	8.14042	22	11	6	13	4	7
Olfr1279	-0.584915	0.243015	0.611073	15.1432	17.9485	12.3379	5	29	24	8	20	6
Olfr985	-0.344341	0.244093	0.611073	47.3152	51.9254	42.7051	51	59	55	53	37	33
Olfr828	-0.43351	0.24438	0.611073	20.8423	23.5947	18.0898	23	24	28	20	14	18
Olfr206	-0.421856	0.244411	0.611073	30.1669	33.877	26.4568	29	35	44	34	15	28
Olfr835	-0.226887	0.244541	0.611073	145.324	154.518	136.13	126	186	181	144	113	133
Olfr466	-0.264124	0.245447	0.611929	89.2767	95.6616	82.8917	94	102	108	97	62	80
Olfr1000	-0.3568	0.247619	0.615433	39.6712	43.6976	35.6449	54	44	40	42	36	24
Olfr259	-0.408102	0.248034	0.615433	42.8842	47.531	38.2374	47	57	47	44	19	48
Olfr140	-0.164677	0.248728	0.615433	307.523	320.37	294.675	379	346	288	309	244	291
Olfr116	-0.244284	0.249117	0.615433	110.367	117.471	103.262	119	132	122	125	79	94
Olfr514	-1.87557	0.250816	0.618114	0.165524	0.331049	0	1	0	0	0	0	0
Olfr470	0.784684	0.25134	0.618114	4.79449	3.42663	6.16235	2	3	6	9	4	5
Olfr987	-0.309891	0.253943	0.623106	59.2262	64.6295	53.8229	81	69	54	70	39	47
Olfr323	-0.717964	0.254984	0.623477	7.0907	8.53977	5.64163	10	12	5	12	2	3
Olfr553	-0.267593	0.255241	0.623477	169.25	182.511	155.989	229	212	135	188	97	167
Olfr616	-0.353212	0.256259	0.624559	51.9336	56.6779	47.1893	70	56	53	64	23	51
Olfr1443	-0.24013	0.258033	0.627476	167.516	175.245	159.788	132	209	219	128	210	109
Olfr957	-0.314626	0.259277	0.629094	86.7855	94.88	78.6909	125	102	72	93	47	88
Olfr640	-0.195915	0.260937	0.631712	257.647	271.389	243.906	361	283	211	320	156	233
Olfr1184	0.30961	0.261795	0.632204	70.9251	62.6052	79.245	73	78	47	82	64	81
Olfr1160	-0.410103	0.262304	0.632204	53.9214	62.4053	45.4375	90	79	27	67	27	39
Olfr1513	-0.279047	0.264588	0.636299	153.617	167.517	139.716	232	183	112	170	87	148
Olfr1242	0.22384	0.266277	0.638947	123.666	112.327	135.005	135	123	97	141	119	126
Olfr979	-0.504566	0.267258	0.639889	11.2037	12.9838	9.42351	16	15	10	11	9	7
Olfr520	-0.592082	0.268499	0.641446	10.6794	13.1525	8.20633	23	14	4	12	5	7
Olfr463	-0.272974	0.272658	0.648274	78.3865	83.8373	72.9357	88	84	94	95	46	71
Olfr968	-0.348659	0.27309	0.648274	43.7574	47.9065	39.6084	63	46	42	56	20	40
Olfr108	-1.76199	0.274755	0.648274	0.153391	0.306782	0	0	0	1	0	0	0
Olfr1248	-1.76199	0.274755	0.648274	0.153391	0.306782	0	0	0	1	0	0	0
Olfr908	-1.76199	0.274755	0.648274	0.153391	0.306782	0	0	0	1	0	0	0
Olfr1357	-0.211161	0.275348	0.648274	261.723	278.175	245.271	376	266	234	228	198	274
Olfr1471	0.353222	0.275918	0.648274	35.8339	30.7594	40.9083	27	34	37	47	29	42
Olfr221	-0.409584	0.277271	0.648274	45.9717	50.1934	41.75	55	69	35	77	22	25
Olfr934	-0.405015	0.277563	0.648274	49.38	56.4804	42.2796	87	59	31	53	23	47
Olfr220	-0.125536	0.277745	0.648274	403.092	412.983	393.201	437	424	449	438	323	368
Olfr822	-0.408719	0.277917	0.648274	21.1594	23.7658	18.553	30	25	20	26	13	15
Olfr1359	-0.241592	0.280107	0.651834	85.1207	90.6617	79.5797	91	86	111	76	68	83
Olfr1253	-0.191297	0.280643	0.651834	170.11	177.71	162.509	184	189	191	179	115	174
Olfr1110	-0.126066	0.284916	0.660348	376.113	386.287	365.94	465	362	394	432	291	331
Olfr661	-0.197323	0.285743	0.660856	169.961	178.587	161.335	207	199	159	193	116	157
Olfr1006	-0.233333	0.286834	0.661233	108.267	114.63	101.905	129	118	116	114	68	112
Olfr763	-0.327027	0.287317	0.661233	47.3615	51.5001	43.2229	59	54	50	58	25	43
Olfr972	-0.275308	0.287731	0.661233	85.7847	91.1962	80.3733	100	94	95	65	58	106
Olfr1002	-0.497729	0.28846	0.66151	14.5126	16.7224	12.3027	31	15	6	26	5	6
Olfr1157	-0.242224	0.289506	0.661921	107.241	116.122	98.3607	165	122	78	122	77	85
Olfr1246	-0.218005	0.289926	0.661921	136.091	144.576	127.605	146	189	124	131	108	126
Olfr771	-0.284837	0.290782	0.661921	62.7518	67.6217	57.882	65	74	76	72	47	48
Olfr303	-0.218797	0.291075	0.661921	102.455	108.303	96.6057	121	121	101	116	82	80
Olfr652	-0.216206	0.294426	0.665833	184.065	194.387	173.744	264	197	151	237	99	171
Olfr1206	0.222586	0.294499	0.665833	254.008	228.548	279.467	126	268	340	187	380	210
Olfr193	-0.181132	0.294633	0.665833	163.029	170.266	155.793	194	174	171	155	145	144
Olfr887	-0.279846	0.296072	0.666911	58.026	62.4605	53.5915	68	58	72	64	36	55
Olfr807	-0.36832	0.297821	0.666911	26.5098	29.4624	23.5571	37	29	27	23	23	21
Olfr1170	-0.351354	0.29896	0.666911	92.6163	104.975	80.2581	161	117	51	106	44	84
Olfr1330	-0.196695	0.299575	0.666911	143.576	150.519	136.634	139	169	171	142	104	146
Olfr1058	-0.84255	0.299586	0.666911	4.48029	5.39332	3.56726	7	7	3	9	0	2
Olfr1044	-0.196567	0.299919	0.666911	227.292	240.24	214.345	316	290	151	318	146	162
Olfr937	-0.364269	0.300176	0.666911	47.0157	53.2854	40.7461	82	54	31	49	26	43
Olfr921	-0.240845	0.300425	0.666911	95.2578	100.813	89.7029	104	102	114	121	70	69
Olfr1384	-0.108562	0.300632	0.666911	566.171	576.15	556.191	590	625	614	598	513	479
Olfr78	-0.303263	0.302958	0.668979	77.2617	84.8203	69.7031	115	102	50	103	42	59
Olfr59	-0.178675	0.303654	0.668979	205.201	213.575	196.827	218	246	214	239	140	190
Olfr324	-0.238973	0.303685	0.668979	90.9775	96.7166	85.2385	87	100	121	98	59	89
Olfr803	-0.487778	0.305458	0.668979	14.1384	16.5877	11.689	13	11	29	16	8	10
Olfr862	-1.28972	0.305733	0.668979	1.09809	1.56051	0.635675	1	2	2	2	0	0
Olfr381	0.350818	0.305854	0.668979	31.134	26.2876	35.9804	20	28	36	24	26	52
Olfr1310	-0.475522	0.305872	0.668979	16.4228	18.8995	13.9461	19	27	14	13	9	18
Olfr1226	0.111083	0.307783	0.671808	528.317	495.104	561.529	438	584	555	475	603	507
Olfr836	-0.395117	0.308963	0.673032	19.1158	21.3271	16.9045	18	25	25	17	18	13
Olfr298	0.345044	0.309913	0.673752	29.1683	25.1345	33.2022	23	29	28	36	30	29
Olfr521	-0.307953	0.311092	0.674963	49.5014	54.0168	44.9859	87	51	31	78	25	30
Olfr99	-0.306626	0.312149	0.675907	52.8072	57.3804	48.234	74	49	58	44	34	60
Olfr1148	-0.298609	0.313036	0.675935	45.8879	49.7229	42.053	62	46	49	52	26	44
Olfr1410	-0.198278	0.313516	0.675935	124.478	130.671	118.285	131	152	132	137	99	104
Olfr1010	-0.950268	0.314027	0.675935	1.93085	2.55482	1.30687	4	3	1	3	0	1
Olfr283	0.591402	0.315433	0.67762	6.03113	4.77392	7.28834	7	2	6	8	5	8
Olfr65	-0.187437	0.317948	0.681675	300.569	313.05	288.089	394	333	261	368	166	304
Olfr328	0.140847	0.319887	0.684482	291.798	271.465	312.131	224	306	336	280	331	272
Olfr51	-0.40981	0.321081	0.685688	42.6738	48.0217	37.326	54	69	29	58	17	35
Olfr1186	-0.548015	0.322444	0.687249	9.25822	10.8022	7.71423	2	14	19	2	12	7
Olfr772	-0.336928	0.323366	0.687865	39.9904	44.1038	35.8771	58	46	35	36	25	42
Olfr539	0.249696	0.32444	0.688801	98.2019	86.3968	110.007	92	91	91	136	58	126
Olfr954	-0.389011	0.327393	0.693715	20.6173	22.6732	18.5614	23	23	26	11	19	22
Olfr992	-0.335911	0.329709	0.696835	29.5089	32.2281	26.7897	37	33	32	38	19	21
Olfr866	-1.2444	0.330147	0.696835	1.09867	1.56167	0.635675	1	3	1	2	0	0
Olfr965	-0.240455	0.331611	0.698301	73.7598	79.12	68.3996	109	74	66	86	49	63
Olfr1342	-0.186362	0.332127	0.698301	126.559	132.916	120.201	124	119	180	122	98	124
Olfr1066	-1.22313	0.332936	0.698602	1.11081	1.58594	0.635675	2	3	0	2	0	0
Olfr555	-0.767185	0.333555	0.698602	3.06567	3.80505	2.3263	5	2	5	5	1	1
Olfr692	0.287731	0.335405	0.701125	69.9458	63.7456	76.146	95	72	33	101	54	66
Olfr1256	-0.218066	0.336516	0.702098	91.6443	95.4324	87.8561	71	121	113	58	110	77
Olfr1099	0.157216	0.33913	0.704571	239.734	222.662	256.806	188	244	278	291	221	225
Olfr1353	-0.265639	0.340249	0.704571	53.8897	57.6404	50.1389	59	58	66	43	49	50
Olfr697	-0.507307	0.340389	0.704571	7.69318	8.84538	6.54097	10	11	7	10	6	3
Olfr159	-1.32495	0.342652	0.704571	0.643941	0.970045	0.317837	2	1	0	1	0	0
Olfr802	-0.224299	0.342811	0.704571	77.1899	81.7384	72.6414	90	84	85	82	56	71
Olfr843	-0.223117	0.342969	0.704571	91.5201	97.2645	85.7757	83	127	100	94	72	80
Olfr1509	0.193445	0.343862	0.704571	126.508	112.464	140.551	75	174	111	90	207	92
Olfr748	-0.280017	0.344915	0.704571	70.6095	78.583	62.636	111	98	38	80	50	51
Olfr484	-0.343713	0.344934	0.704571	25.1746	27.847	22.5022	21	29	39	22	22	20
Olfr832	-0.552174	0.346774	0.704571	7.96404	9.10479	6.82328	8	12	9	12	6	2
Olfr747	-0.363114	0.347012	0.704571	23.8483	26.4911	21.2056	28	36	20	17	20	23
Olfr310	-0.887558	0.347358	0.704571	2.54391	3.14528	1.94255	3	4	3	5	0	1
Olfr1111	-0.340955	0.349728	0.704571	28.064	31.1542	24.9738	30	47	22	32	22	18
Olfr571	-0.228457	0.351054	0.704571	104.137	109.428	98.8452	104	124	120	112	58	116
Olfr195	0.144946	0.353389	0.704571	418.925	387.341	450.51	329	413	493	418	511	344
Olfr1243	-0.187004	0.353396	0.704571	115.992	121.475	110.51	107	132	148	112	93	111
Olfr212	-0.124681	0.353865	0.704571	258.38	264.518	252.241	280	286	273	249	231	239
Olfr1155	-0.223882	0.354288	0.704571	98.1094	103.246	92.9731	141	103	81	142	51	80
Olfr1043	-0.411647	0.354858	0.704571	51.379	56.507	46.2511	88	61	28	81	12	45
Olfr732	-0.214641	0.355179	0.704571	90.5268	94.8036	86.2499	97	93	111	86	55	107
Olfr1037	-0.235655	0.355631	0.704571	65.3811	69.9944	60.7677	100	65	55	82	49	45
Olfr780	-0.550488	0.356071	0.704571	10.0095	11.8532	8.16568	7	22	9	14	6	4
Olfr770	-0.482471	0.356631	0.704571	13.7282	15.872	11.5843	21	20	9	9	8	16
Olfr1445	0.964937	0.356711	0.704571	1.4777	0.946944	2.00846	1	2	0	4	1	1
Olfr655	-0.190605	0.357368	0.704571	147.151	153.959	140.343	193	154	139	164	89	153
Olfr920	-0.283723	0.357809	0.704571	37.6068	40.598	34.6156	40	45	44	36	30	33
Olfr53	-0.118166	0.358302	0.704571	292.054	298.578	285.529	318	291	338	324	228	269
Olfr24	-0.126923	0.359049	0.704571	425.692	438.404	412.979	534	474	377	463	317	408
Olfr1095	-0.527296	0.359354	0.704571	6.54537	7.73143	5.35932	15	4	5	10	2	4
Olfr613	0.331227	0.359667	0.704571	33.5226	29.1176	37.9276	35	38	19	57	24	30
Olfr461	-0.227409	0.359936	0.704571	69.1174	73.372	64.8627	87	75	70	77	50	60
Olfr867	-0.20514	0.360024	0.704571	96.9958	101.791	92.2006	106	110	107	97	66	102
Olfr171	-0.243578	0.360436	0.704571	78.1221	83.3585	72.8857	55	97	115	61	86	58
Olfr619	0.434	0.360754	0.704571	15.9279	13.5801	18.2758	15	21	7	23	12	18
Olfr811	-0.276372	0.361151	0.704571	75.2001	79.9763	70.4239	93	89	71	58	48	95
Olfr656	-0.2204	0.361772	0.704571	92.892	97.7612	88.0228	130	101	77	133	52	73
Olfr273	-0.199735	0.361853	0.704571	105.404	109.482	101.325	107	108	133	84	72	133
Olfr66	-0.285805	0.362653	0.704571	35.9149	38.7613	33.0685	53	41	28	48	28	20
Olfr510	-0.302309	0.36372	0.704571	36.5828	40.1294	33.0363	59	37	30	35	35	24
Olfr1511	-0.229765	0.364242	0.704571	143.712	155.638	131.787	237	152	99	161	83	138
Olfr154	-0.858428	0.364277	0.704571	4.42231	5.41759	3.42703	8	7	2	3	0	7
Olfr642	-0.256957	0.365123	0.704954	58.0068	62.4814	53.5321	94	61	41	83	33	41
Olfr247	-0.287777	0.367603	0.707192	38.3442	41.8616	34.8269	54	48	30	40	30	30
Olfr1335	-1.01221	0.367642	0.707192	2.53051	2.83617	2.22486	3	2	4	7	0	0
Olfr361	-0.26216	0.368782	0.707192	47.1081	50.3903	43.826	51	58	51	53	39	34
Olfr1052	-0.247896	0.368885	0.707192	67.284	71.6036	62.9645	77	82	68	73	41	68
Olfr395	-0.497914	0.372926	0.713681	6.53688	7.54196	5.5318	7	8	9	6	3	7
Olfr585	-0.795415	0.373991	0.714182	2.88599	3.76351	2.00846	3	8	1	4	1	1
Olfr1333	-0.376805	0.374502	0.714182	18.7191	20.7077	16.7305	18	20	28	25	10	14
Olfr339	-0.171899	0.376055	0.715888	160.941	166.088	155.794	174	164	189	200	93	160
Olfr1028	-0.229876	0.382816	0.727485	89.1805	95.5301	82.8309	113	120	69	97	60	82
Olfr123	-0.219648	0.383797	0.728075	67.1264	70.9287	63.3241	75	71	79	74	54	54
Olfr1223	0.398437	0.385852	0.730698	12.3963	10.422	14.3705	12	6	15	11	9	21
Olfr1301	-0.123078	0.387048	0.731688	298.128	304.912	291.345	300	309	360	336	259	241
Olfr1321	0.196429	0.391371	0.737998	187.613	171.166	204.06	91	195	264	131	275	161
Olfr1154	0.306604	0.391743	0.737998	101.43	98.0461	104.814	180	94	31	135	72	97
Olfr593	0.515409	0.393208	0.738931	7.3544	5.6504	9.05841	5	6	7	17	4	6
Olfr345	0.975292	0.393598	0.738931	0.993758	0.614729	1.37279	0	1	1	2	1	1
Olfr311	-0.697139	0.395784	0.739815	2.28539	2.81423	1.75654	2	4	3	2	2	1
Olfr26	-1.18223	0.395901	0.739815	0.653215	0.922677	0.383753	0	2	1	0	1	0
Olfr589	-0.770811	0.396155	0.739815	2.27305	2.88587	1.66023	5	3	1	3	0	2
Olfr885	-0.745598	0.396791	0.739815	4.0274	5.0877	2.9671	7	8	1	6	0	3
Olfr228	-0.252986	0.398226	0.741219	45.1575	48.0966	42.2184	58	50	44	59	28	36
Olfr644	-0.170827	0.399137	0.741644	132.905	139.266	126.544	182	148	109	158	93	115
Olfr611	-0.305716	0.400762	0.742136	66.5631	72.1634	60.9628	113	76	37	104	23	54
Olfr1393	0.238843	0.401077	0.742136	59.6519	53.8058	65.4981	66	44	60	62	65	59
Olfr1366	-0.193416	0.402533	0.742136	94.3295	99.0334	89.6256	132	98	82	122	57	82
Olfr1250	-0.19281	0.403904	0.742136	82.956	86.7428	79.1692	94	83	98	79	58	90
Olfr1408	-0.173583	0.404484	0.742136	144.767	151.103	138.43	188	177	112	194	96	113
Olfr357	-0.200093	0.405148	0.742136	80.9466	85.2282	76.6649	81	107	83	85	64	71
Olfr459	0.246003	0.405678	0.742136	57.3987	50.886	63.9115	46	61	55	58	43	82
Olfr1298	-0.266546	0.4059	0.742136	33.1664	35.5635	30.7693	35	41	37	34	29	25
Olfr1289	-0.360156	0.40746	0.742136	14.7613	16.3897	13.1329	17	21	14	16	9	13
Olfr665	-0.131546	0.407522	0.742136	294.145	303.024	285.266	373	328	256	339	202	283
Olfr641	-0.394899	0.407719	0.742136	14.1144	15.8939	12.335	22	18	10	16	6	14
Olfr139	-0.220767	0.407736	0.742136	67.3185	72.1767	62.4602	101	74	52	75	50	55
Olfr1098	0.251606	0.408364	0.742136	39.0453	34.9406	43.15	35	33	43	47	33	44
Olfr507	-0.663233	0.40896	0.742136	2.90131	3.47633	2.3263	4	4	3	5	1	1
Olfr1056	-0.231071	0.410822	0.744272	68.2896	72.9318	63.6474	94	78	58	68	46	69
Olfr469	-0.182081	0.412123	0.745229	85.9049	89.7351	82.0748	103	94	87	97	70	69
Olfr872	-0.553461	0.413224	0.745229	8.71144	10.4117	7.01116	11	18	4	5	4	11
Olfr401	-0.71611	0.413407	0.745229	2.8385	3.57223	2.10477	8	3	0	3	3	0
Olfr653	-0.17731	0.416706	0.749899	337.157	350.34	323.974	422	422	263	435	181	329
Olfr187	-0.172282	0.417649	0.749899	96.5779	100.667	92.4892	111	94	114	100	79	86
Olfr586	-0.182065	0.418067	0.749899	143.113	149.197	137.028	173	170	129	157	88	151
Olfr1391	-0.152832	0.419549	0.751318	131.896	136.084	127.709	153	127	151	159	86	125
Olfr1280	0.16254	0.420811	0.752337	364.187	339.426	388.948	163	399	530	244	526	310
Olfr551	0.394566	0.422716	0.754503	9.3525	7.89844	10.8066	9	9	7	11	8	12
Olfr1251	0.140714	0.425391	0.756909	187.846	174.622	201.069	170	200	185	206	148	223
Olfr1197	-0.111534	0.425457	0.756909	250.077	254.745	245.408	270	269	269	233	220	246
Olfr1195	0.115172	0.427035	0.758476	274.731	254.828	294.633	182	330	303	200	371	251
Olfr707	-0.273889	0.428378	0.759619	34.2645	36.645	31.8839	29	41	47	33	18	41
Olfr164	-0.168719	0.429147	0.759685	95.4627	99.1415	91.7839	98	109	108	96	86	80
Olfr412	-0.259249	0.429813	0.759685	56.4495	60.6598	52.2392	82	64	45	58	31	62
Olfr110	-0.119008	0.431358	0.761179	262.222	267.066	257.377	272	270	306	316	176	253
Olfr169	-0.103901	0.432652	0.762224	307.223	311.352	303.094	272	364	356	278	322	258
Olfr1454	-0.206363	0.435231	0.762887	61.2126	64.3521	58.0731	70	60	74	74	44	50
Olfr319	-0.214026	0.435535	0.762887	58.135	61.0995	55.1705	62	68	64	48	46	63
Olfr492	-1.08457	0.43564	0.762887	1.09926	1.56284	0.635675	1	4	0	2	0	0
Olfr981	-0.41106	0.436189	0.762887	15.6659	16.6976	14.6341	17	22	14	30	5	9
Olfr519	-0.408921	0.437611	0.762887	11.1412	12.9908	9.29168	16	21	4	13	7	7
Olfr1019	-0.143459	0.437616	0.762887	169.091	174.854	163.327	232	161	158	198	106	169
Olfr1287	0.823335	0.43794	0.762887	1.32441	0.922677	1.72615	0	2	1	2	1	2
Olfr181	-0.132515	0.443202	0.7698	163.642	168.5	158.784	198	155	180	166	140	148
Olfr1306	-0.308245	0.443491	0.7698	19.744	21.7755	17.7126	11	29	30	15	19	16
Olfr403	-0.182086	0.444033	0.7698	78.7185	82.1567	75.2804	82	83	96	89	58	70
Olfr394	-0.171158	0.445636	0.771102	85.2107	88.5443	81.8771	92	91	98	77	75	81
Olfr912	-0.1818	0.446628	0.771102	83.3304	86.8139	79.8469	84	89	103	98	56	77
Olfr1232	-0.140289	0.447492	0.771102	156.835	160.594	153.077	162	175	173	126	138	170
Olfr1057	-0.239781	0.447689	0.771102	36.3516	38.5695	34.1337	45	43	34	47	27	25
Olfr710	-0.382237	0.448331	0.771102	7.90984	8.81878	7.0009	9	9	10	7	6	7
Olfr1329	-0.558203	0.450011	0.771624	3.45472	4.16386	2.74557	7	5	1	4	2	2
Olfr801	0.121011	0.450055	0.771624	253.332	237.602	269.063	259	266	228	300	193	282
Olfr338	-0.42071	0.451282	0.77251	8.33512	9.55951	7.11073	14	14	2	13	5	3
Olfr1	-0.116481	0.453736	0.774233	312.497	316.737	308.257	331	334	340	408	202	286
Olfr543	-0.330749	0.454184	0.774233	12.4603	13.6205	11.3001	17	14	12	17	8	8
Olfr1022	-0.840732	0.454426	0.774233	0.974012	1.27683	0.671197	2	1	1	1	0	1
Olfr161	-0.492562	0.459173	0.780197	6.79013	7.9031	5.67716	9	13	3	11	2	4
Olfr685	-0.1268	0.460582	0.780197	205.68	211.386	199.975	269	201	197	220	140	216
Olfr794	-0.152016	0.460672	0.780197	143.879	149.058	138.701	167	175	130	133	115	148
Olfr1284	0.34528	0.461218	0.780197	14.1286	12.2638	15.9934	12	7	20	25	9	13
Olfr389	-0.130045	0.462134	0.780197	151.921	155.99	147.852	175	166	153	152	136	134
Olfr583	-1.03855	0.462232	0.780197	0.62084	0.923843	0.317837	0	3	0	1	0	0
Olfr148	-0.365431	0.463866	0.780208	9.47235	10.4509	8.49378	13	10	10	13	4	8
Olfr919	-0.314861	0.464199	0.780208	23.3626	25.0426	21.6827	32	26	21	24	9	30
Olfr860	-0.266933	0.464393	0.780208	22.9878	24.6364	21.3392	28	24	26	28	14	20
Olfr23	-0.235006	0.468089	0.785205	36.5916	38.9225	34.2608	47	41	35	40	23	36
Olfr191	0.104348	0.469081	0.785656	216.234	203.819	228.648	196	230	222	210	223	216
Olfr700	0.513578	0.469997	0.785979	3.52352	2.86277	4.18428	4	4	1	5	4	3
Olfr341	-0.247445	0.471845	0.787858	38.8746	41.7454	36.0037	62	45	24	58	20	28
Olfr570	-0.198292	0.474692	0.791397	155.586	165.274	145.899	228	184	108	152	95	173
Olfr970	-0.206254	0.477024	0.793509	45.9129	48.2144	43.6114	63	47	42	63	32	32
Olfr94	-0.510856	0.477596	0.793509	7.40145	7.82913	6.97377	6	12	7	16	4	1
Olfr678	-0.270083	0.478391	0.793509	36.2392	38.5014	33.977	42	47	33	42	16	41
Olfr1495	-0.185097	0.478879	0.793509	69.2867	72.9988	65.5746	97	73	60	76	49	64
Olfr1200	-0.114497	0.479916	0.793766	277.62	285.041	270.199	294	231	380	254	258	256
Olfr477	-0.168913	0.482724	0.793766	80.3354	83.3157	77.3552	79	87	99	86	53	84
Olfr917	-0.573069	0.48377	0.793766	4.85759	5.93991	3.77526	4	12	3	4	1	6
Olfr486	0.697436	0.484041	0.793766	1.72069	1.30109	2.14029	3	1	0	2	3	1
Olfr50	0.431572	0.484261	0.793766	6.73689	5.34362	8.13016	5	6	6	15	6	3
Olfr494	-0.245033	0.485457	0.793766	28.8023	30.4023	27.2023	38	25	33	42	14	24
Olfr600	-0.2022	0.486761	0.793766	51.5336	54.2213	48.8458	70	54	47	64	31	47
Olfr10	-0.634731	0.487082	0.793766	1.77401	2.17524	1.37279	1	3	3	2	1	1
Olfr643	0.203729	0.4872	0.793766	48.7912	44.3158	53.2667	54	48	38	74	37	44
Olfr157	0.21484	0.487307	0.793766	37.9149	34.1352	41.6946	27	35	47	30	35	53
Olfr808	-0.208517	0.487641	0.793766	61.6443	65.3656	57.923	86	70	50	64	39	64
Olfr1042	-0.192152	0.487987	0.793766	99.2019	107.309	91.0947	169	111	56	123	60	82
Olfr538	-0.24245	0.488527	0.793766	29.3013	31.2972	27.3053	37	24	38	36	22	21
Olfr1337	-0.795236	0.490178	0.794373	1.00697	1.27683	0.737113	2	1	1	0	1	1
Olfr893	-0.160567	0.492006	0.794373	86.2788	90.0702	82.4875	66	99	123	78	73	84
Olfr959	-0.168616	0.492371	0.794373	160.845	169.339	152.35	244	180	108	204	89	151
Olfr629	-0.20993	0.492422	0.794373	44.5152	47.3461	41.6842	65	50	34	55	29	37
Olfr826	0.210414	0.492555	0.794373	39.7097	35.9361	43.4833	38	35	41	45	30	50
Olfr156	-0.227966	0.495473	0.794843	33.1095	35.1319	31.0871	30	38	44	35	29	25
Olfr1122	-0.145031	0.495757	0.794843	110.439	114.21	106.667	137	118	106	113	84	109
Olfr812	-0.199586	0.49589	0.794843	54.8501	57.3973	52.3029	61	71	50	73	39	40
Olfr1507	0.119288	0.496213	0.794843	4046.39	3802.78	4290.01	2134	4451	5625	2870	5652	3421
Olfr734	-0.164458	0.496503	0.794843	70.8342	73.6002	68.0682	84	70	79	78	52	66
Olfr516	-0.274716	0.498786	0.79681	42.9722	45.7204	40.2239	48	62	35	56	17	45
Olfr995	-0.322161	0.499261	0.79681	15.4751	17.2424	13.7077	27	18	9	18	7	15
Olfr282	0.313904	0.499931	0.79681	10.4679	9.1706	11.7652	11	6	12	13	7	14
Olfr199	-0.246978	0.50089	0.79717	24.6279	26.1703	23.0855	28	24	31	32	18	17
Olfr1436	0.966958	0.502644	0.798793	0.52253	0.307948	0.737113	0	1	0	0	1	1
Olfr1215	-0.193307	0.505401	0.80065	43.829	45.9451	41.7128	45	54	47	42	38	39
Olfr1131	-0.307337	0.506386	0.80065	12.9283	14.1895	11.667	28	10	6	24	5	6
Olfr102	-0.185582	0.506718	0.80065	51.0251	53.5002	48.55	66	45	58	55	34	51
Olfr1130	-0.262115	0.507546	0.80065	19.5015	20.8337	18.1692	23	24	19	26	12	15
Olfr1440	-0.115067	0.508001	0.80065	260.864	265.513	256.216	269	316	258	318	175	249
Olfr877	-0.348793	0.508232	0.80065	14.0902	15.1406	13.0398	16	23	9	26	6	7
Olfr963	-0.237923	0.509162	0.800955	38.5488	41.3931	35.7046	47	55	29	40	24	39
Olfr1152	-0.258222	0.511037	0.801824	17.9232	19.2004	16.6459	19	22	20	20	13	15
Olfr767	-0.209905	0.51119	0.801824	38.6357	40.7216	36.5498	45	47	37	33	32	39
Olfr420	-0.357072	0.512107	0.802104	23.53	27.9187	19.1414	49	34	4	35	8	14
Olfr153	0.319064	0.514589	0.804832	14.7367	13.0335	16.4398	18	16	7	15	12	20
Olfr432	0.193579	0.516927	0.804973	58.6144	54.6807	62.5482	76	60	36	66	54	59
Olfr56	-0.15831	0.517717	0.804973	74.6963	77.3921	72.0006	75	89	82	81	57	69
Olfr533	-0.0576265	0.520222	0.804973	1887.56	1890.15	1884.97	2045	1962	1985	1967	1641	1783
Olfr815	-0.309227	0.521088	0.804973	14.8087	16.6046	13.0128	26	18	8	12	12	13
Olfr1490	-0.210558	0.521272	0.804973	42.4606	44.6828	40.2385	56	58	27	65	28	25
Olfr792	-0.236963	0.522029	0.804973	32.4566	34.2872	30.6261	46	33	29	36	15	38
Olfr854	-0.432018	0.522114	0.804973	4.4097	5.01374	3.80566	4	7	5	4	2	5
Olfr1030	-0.153145	0.522432	0.804973	158.551	167.906	149.197	248	183	96	201	98	135
Olfr559	-0.25806	0.522527	0.804973	19.2126	20.8123	17.613	35	19	11	30	10	12
Olfr1257	-0.0708236	0.52253	0.804973	447.508	448.906	446.11	460	497	468	424	443	400
Olfr518	-0.157195	0.523066	0.804973	76.802	80.1058	73.4982	98	96	59	92	61	59
Olfr666	-0.178017	0.524037	0.804973	64.7069	67.9713	61.4426	92	75	47	86	41	52
Olfr1497	-0.244849	0.524306	0.804973	27.4611	29.2989	25.6234	43	27	22	35	12	28
Olfr1132	-0.193433	0.526003	0.806439	40.7126	42.9413	38.4838	61	39	35	53	26	33
Olfr294	0.91313	0.527424	0.807479	0.504769	0.307948	0.70159	0	1	0	1	1	0
Olfr1255	-0.195258	0.529241	0.807667	37.5799	39.4182	35.7416	42	44	39	35	31	36
Olfr1472	-0.416574	0.529614	0.807667	4.46071	5.08537	3.83605	7	6	3	4	3	4
Olfr1033	-0.133054	0.530117	0.807667	150.696	155.408	145.983	202	157	131	163	99	159
Olfr904	-0.237623	0.530519	0.807667	24.375	25.5799	23.17	29	23	29	37	15	16
Olfr312	-0.387998	0.532512	0.809568	4.79889	5.34245	4.25532	5	5	7	3	4	5
Olfr549	-0.110155	0.533809	0.810405	211.814	217.743	205.884	303	210	172	260	137	200
Olfr125	0.118163	0.536087	0.812178	142.597	133.943	151.252	139	161	125	187	126	123
Olfr596	-0.149946	0.536471	0.812178	113.166	119.872	106.459	167	140	70	124	90	92
Olfr654	-0.139872	0.541634	0.818238	94.5019	96.5872	92.4166	107	99	100	129	64	76
Olfr1048	-0.172429	0.541979	0.818238	64.3112	67.4046	61.2178	81	81	51	75	44	58
Olfr888	-0.313488	0.542979	0.81861	8.18632	8.93895	7.4337	14	8	6	13	4	5
Olfr243	-0.203895	0.544669	0.819523	30.7787	32.4465	29.1109	46	33	23	44	21	20
Olfr1193	-0.0766039	0.545092	0.819523	390.181	391.213	389.149	400	415	427	342	403	356
Olfr1313	-0.192807	0.546024	0.819791	42.0644	43.7225	40.4063	42	52	45	33	31	51
Olfr806	-0.134389	0.549988	0.824455	86.3992	88.6241	84.1744	95	97	89	101	74	67
Olfr618	-0.15953	0.551037	0.824455	79.0587	82.5174	75.6001	96	101	64	80	58	79
Olfr149	-0.269549	0.551802	0.824455	14.8062	16.1331	13.4792	32	15	3	27	10	3
Olfr1362	-0.170037	0.552165	0.824455	129.242	135.111	123.373	161	179	87	177	69	115
Olfr91	-0.154319	0.555764	0.82869	60.0099	62.0649	57.9549	64	65	68	60	47	59
Olfr435	-0.205747	0.560135	0.832843	29.8314	31.6458	28.0171	38	39	23	35	21	25
Olfr1093	-0.118601	0.560436	0.832843	104.86	107.222	102.498	115	108	117	111	84	99
Olfr1141	0.75176	0.561562	0.832843	0.852018	0.613563	1.09047	0	0	2	0	1	2
Olfr498	-0.275063	0.562094	0.832843	10.3133	10.9952	9.63151	10	13	12	6	10	11
Olfr1496	-0.144326	0.56238	0.832843	74.2941	76.6305	71.9578	95	72	75	76	73	56
Olfr552	-0.101966	0.563935	0.83401	275.219	282.057	268.382	384	271	233	295	188	290
Olfr1202	0.238876	0.566951	0.835547	49.8279	42.3838	57.272	25	47	64	39	93	26
Olfr672	-0.0986576	0.567226	0.835547	251.217	255.999	246.435	295	298	217	258	190	259
Olfr582	-0.155969	0.56728	0.835547	62.6842	65.0378	60.3306	86	52	67	65	38	71
Olfr98	-0.540401	0.568999	0.836179	1.62231	1.93776	1.30687	4	0	2	3	0	1
Olfr695	-0.120798	0.569431	0.836179	191.365	195.856	186.874	195	262	165	252	130	161
Olfr1392	-0.0793969	0.570017	0.836179	341.029	343.014	339.045	350	373	366	402	243	334
Olfr168	-0.0831984	0.57135	0.837005	307.271	309.781	304.761	285	324	377	316	305	247
Olfr1290	-0.110071	0.572943	0.83779	128.663	131.143	126.183	126	135	156	146	102	115
Olfr1166	-0.275566	0.574182	0.83779	11.2135	12.1617	10.2653	20	16	2	18	10	2
Olfr1431	-0.141128	0.574198	0.83779	70.461	72.7827	68.1393	88	75	67	76	52	68
Olfr955	0.28116	0.575746	0.837878	12.5971	10.7358	14.4584	12	12	10	25	5	13
Olfr419	-0.0957365	0.5758	0.837878	206.013	210.26	201.767	259	233	172	233	156	192
Olfr1249	-0.276451	0.57749	0.839213	8.76352	9.41041	8.11663	8	11	11	8	9	6
Olfr128	0.215857	0.581438	0.84325	18.1641	16.3654	19.9627	16	21	15	23	21	13
Olfr1212	-0.0910362	0.581819	0.84325	189.135	188.794	189.476	158	238	206	135	230	165
Olfr875	-0.195901	0.58261	0.843272	41.2659	44.254	38.2777	64	50	25	48	25	38
Olfr1417	0.104781	0.585198	0.845891	150.774	142.331	159.217	131	154	168	189	123	147
Olfr1450	-0.243828	0.587399	0.846818	20.3261	21.5599	19.0923	15	24	30	29	11	16
Olfr1158	-0.478411	0.587574	0.846818	2.27543	2.57792	1.97294	5	2	1	5	1	0
Olfr58	-0.19578	0.588176	0.846818	30.376	32.1837	28.5682	22	44	37	32	24	26
Olfr218	-0.175625	0.593219	0.851599	59.6508	61.5339	57.7677	80	66	48	78	27	64
Olfr676	0.150016	0.593387	0.851599	70.7491	66.5848	74.9134	85	84	41	105	53	60
Olfr138	0.135506	0.593847	0.851599	69.2333	64.4468	74.0197	74	58	72	77	49	87
Olfr344	-0.429238	0.596152	0.851773	2.80509	3.14178	2.46839	3	1	6	1	1	5
Olfr1487	-0.181731	0.598263	0.851773	30.7493	32.0629	29.4357	30	37	35	34	20	31
Olfr1275	-0.200742	0.598869	0.851773	41.2404	41.0393	41.4415	33	43	55	23	65	26
Olfr107	-0.116247	0.599214	0.851773	107.406	108.655	106.157	124	97	123	125	58	125
Olfr6	0.0588651	0.599419	0.851773	497.274	477.241	517.306	489	515	511	507	441	529
Olfr994	-0.163618	0.599568	0.851773	109.407	118.851	99.9623	202	114	55	132	60	99
Olfr608	0.159374	0.59989	0.851773	48.2676	44.9375	51.5977	54	55	33	46	54	46
Olfr1265	-0.115145	0.600238	0.851773	111.866	112.763	110.968	115	124	119	110	129	75
Olfr1121	-0.180811	0.608008	0.861675	26.1204	27.167	25.0738	31	27	28	34	16	23
Olfr340	0.601157	0.608834	0.861722	0.846973	0.638996	1.05495	1	1	0	1	1	1
Olfr958	-0.124078	0.610061	0.862336	113.058	114.996	111.121	144	120	99	147	61	116
Olfr70	0.132693	0.612643	0.863819	66.9021	62.6693	71.135	63	78	58	69	61	73
Olfr506	-0.09384	0.6127	0.863819	159.396	161.302	157.49	217	164	127	233	106	121
Olfr918	-0.140819	0.615604	0.866374	61.0656	63.8791	58.2522	88	69	44	65	51	51
Olfr631	-0.449946	0.616106	0.866374	1.92928	2.19834	1.66023	2	2	3	3	0	2
Olfr124	-0.0701359	0.618343	0.868252	687.251	679.724	694.778	553	768	848	530	866	549
Olfr1120	-0.15077	0.619382	0.868252	46.9994	49.0081	44.9908	71	35	48	60	39	31
Olfr284	-0.228338	0.619838	0.868252	11.5056	11.9918	11.0193	13	16	9	11	15	5
Olfr1089	-0.439114	0.620667	0.868295	2.25431	2.53055	1.97807	3	3	2	4	0	2
Olfr1441	0.22522	0.622625	0.869914	12.0541	10.9791	13.1292	9	20	6	13	17	7
Olfr192	-0.185329	0.624051	0.870787	20.2941	21.1139	19.4743	22	22	23	16	20	19
Olfr624	-0.171962	0.624894	0.870846	27.7861	29.0868	26.4854	47	25	19	44	16	18
Olfr975	-0.183566	0.628795	0.871812	21.7561	22.8443	20.668	30	24	18	27	14	19
Olfr293	-0.142903	0.629341	0.871812	54.4335	56.0211	52.846	55	68	55	56	37	59
Olfr827	0.144684	0.629412	0.871812	113.024	104.854	121.194	66	149	121	109	69	170
Olfr1382	-0.0555753	0.630869	0.871812	397.296	397.611	396.981	448	430	381	459	344	337
Olfr1381	-0.0974397	0.630885	0.871812	113.564	115.629	111.499	145	116	104	137	85	100
Olfr1031	-0.129735	0.632217	0.871812	63.8432	65.9295	61.7569	84	69	55	61	57	58
Olfr31	-0.0572955	0.632459	0.871812	358.41	359.009	357.812	340	355	447	344	316	360
Olfr622	-0.116615	0.632813	0.871812	102.929	104.831	101.028	117	120	95	108	67	116
Olfr201	-0.128159	0.632978	0.871812	58.122	59.8647	56.3792	75	54	60	62	44	56
Olfr1388	-0.163864	0.634911	0.871812	56.4185	58.8736	53.9635	58	84	45	70	32	55
Olfr809	-0.163252	0.635439	0.871812	39.3679	40.9111	37.8248	53	43	33	40	24	45
Olfr1247	0.068483	0.635747	0.871812	237.05	226.445	247.655	231	226	262	264	179	269
Olfr460	0.0992087	0.637	0.871812	101.828	96.1492	107.506	89	98	119	105	79	124
Olfr1118	0.158931	0.637653	0.871812	54.1244	50.4002	57.8487	64	59	36	57	40	69
Olfr1419	-0.0929883	0.638281	0.871812	117.444	119.009	115.879	145	120	111	149	92	94
Olfr1352	-0.0705609	0.638733	0.871812	202.937	204.172	201.702	212	200	236	213	177	187
Olfr1302	0.142071	0.639222	0.871812	41.5091	38.6983	44.32	38	36	49	53	32	43
Olfr1324	-0.0841648	0.640575	0.872562	164.152	165.029	163.275	181	163	179	212	109	153
Olfr270	0.248646	0.643794	0.875795	25.1051	22.6797	27.5304	10	36	27	41	12	28
Olfr1222	-0.0728851	0.645383	0.875795	277.191	277.479	276.902	295	302	283	351	185	267
Olfr623	0.172677	0.64626	0.875795	27.3576	25.1154	29.5997	35	26	18	45	15	27
Olfr659	-0.178377	0.64699	0.875795	20.7063	21.6136	19.799	30	21	17	29	11	18
Olfr481	-0.15452	0.647618	0.875795	43.0216	43.8028	42.2404	58	51	29	74	23	28
Olfr493	0.209982	0.648609	0.875795	14.9616	14.141	15.7821	26	10	8	21	9	16
Olfr850	0.539246	0.649517	0.875795	0.829212	0.638996	1.01943	1	1	0	2	1	0
Olfr1312	-0.0930552	0.650104	0.875795	124.038	125.798	122.278	147	113	138	111	107	130
Olfr1259	-0.0729088	0.650199	0.875795	231.774	232.762	230.786	224	264	252	283	181	202
Olfr172	-0.190732	0.651067	0.875879	14.1559	14.8257	13.4862	16	16	15	16	9	14
Olfr347	-0.17851	0.65456	0.879014	21.0733	22.2358	19.9107	18	15	38	25	10	23
Olfr787	-0.0840199	0.655015	0.879014	167.174	168.401	165.946	193	174	166	180	113	185
Olfr16	-0.0941601	0.658087	0.881604	115.369	117.437	113.301	143	129	99	136	85	106
Olfr1209	-0.0943055	0.659506	0.881604	129.09	130.475	127.706	123	151	141	150	87	132
Olfr1425	-0.0977766	0.660715	0.881604	105.324	106.764	103.885	108	124	107	114	75	110
Olfr603	-0.592563	0.660995	0.881604	0.997696	1.32419	0.671197	4	0	0	1	0	1
Olfr64	-0.149529	0.661	0.881604	78.3472	82.7948	73.8995	107	110	44	96	44	75
Olfr1180	0.148841	0.662144	0.882047	51.6315	47.8403	55.4228	21	74	59	41	81	32
Olfr545	-0.135955	0.663188	0.882357	77.6384	78.6804	76.5963	103	85	60	111	34	80
Olfr301	-0.157625	0.66655	0.885746	45.1053	45.4725	44.7381	51	50	43	50	19	61
Olfr410	-0.105217	0.670024	0.889275	82.5994	84.7909	80.4079	101	105	62	99	64	69
Olfr1404	-0.0965129	0.671593	0.88986	124.167	128.031	120.303	161	158	85	139	98	109
Olfr1442	0.0856949	0.672102	0.88986	110.799	105.504	116.094	120	109	105	133	92	109
Olfr272	-0.143688	0.673223	0.890259	34.9825	35.8275	34.1374	33	46	35	27	27	43
Olfr1084	0.290485	0.67409	0.890324	3.97178	3.4971	4.44646	5	1	5	5	1	7
Olfr1205	0.106768	0.675908	0.891226	174.528	167.571	181.485	68	222	250	121	253	130
Olfr450	-0.190937	0.676414	0.891226	19.0532	20.4916	17.6148	9	22	35	20	10	21
Olfr45	-0.0760329	0.678573	0.892156	145.883	146.523	145.243	165	148	151	174	134	109
Olfr878	0.0780957	0.678761	0.892156	175.69	168.368	183.013	217	172	142	218	126	185
Olfr1161	0.133651	0.679712	0.892328	33.5433	31.4648	35.6218	44	22	33	48	19	37
Olfr1390	-0.360707	0.684136	0.896068	3.03843	3.14528	2.93158	3	4	3	7	0	2
Olfr804	-0.112806	0.684567	0.896068	77.3658	78.6545	76.0772	89	91	69	87	47	86
Olfr1188	-0.338428	0.685728	0.896068	2.78205	3.17188	2.39221	4	6	0	4	2	1
Olfr781	-0.210774	0.685859	0.896068	11.1417	12.0518	10.2317	16	5	17	9	10	10
Olfr1233	-0.141505	0.687562	0.897214	25.7127	26.4853	24.9402	28	31	25	23	22	26
Olfr126	0.131149	0.691267	0.899612	33.0645	31.1297	34.9994	30	26	43	36	31	33
Olfr71	0.106165	0.691687	0.899612	95.5089	88.9269	102.091	82	101	100	140	58	100
Olfr1113	0.182258	0.692115	0.899612	12.0553	11.0437	13.0669	12	13	10	17	8	13
Olfr683	-0.111136	0.692709	0.899612	93.5071	94.3075	92.7067	114	103	81	108	49	112
Olfr1299	-0.11351	0.693881	0.900057	78.0751	79.3942	76.756	68	110	75	108	59	56
Olfr784	-0.100779	0.695196	0.900689	63.3544	64.6085	62.1003	81	51	72	80	44	56
Olfr130	-0.0682598	0.700054	0.905904	223.443	223.216	223.669	211	241	258	292	155	202
Olfr112	-0.103685	0.70206	0.907418	64.3928	65.1709	63.6148	65	77	65	84	52	48
Olfr1254	0.0784258	0.708284	0.912561	153.386	146.427	160.346	200	126	135	183	95	186
Olfr1336	-0.0547878	0.709099	0.912561	227.63	228.065	227.194	272	236	213	235	216	197
Olfr701	-0.0458242	0.709756	0.912561	329.381	328.485	330.276	359	355	327	373	281	294
Olfr799	-0.135076	0.710408	0.912561	26.3228	27.2675	25.3781	35	30	21	28	19	26
Olfr1046	-0.0785851	0.710985	0.912561	197.658	201.134	194.182	276	209	148	231	125	206
Olfr1346	0.0876686	0.712451	0.912561	245.013	233.687	256.339	96	301	356	150	378	180
Olfr1258	0.0521615	0.712465	0.912561	222.776	214.5	231.053	219	229	233	242	200	219
Olfr177	-0.0681838	0.712754	0.912561	140.857	141.537	140.177	136	159	155	152	116	134
Olfr1457	-0.202225	0.715946	0.914947	6.59303	6.95266	6.23339	8	8	6	7	4	7
Olfr1123	0.0703123	0.71715	0.914947	150.164	143.512	156.816	167	155	132	194	108	152
Olfr1303	0.0874839	0.717455	0.914947	81.7093	77.2944	86.1242	84	81	80	112	58	80
Olfr1208	-0.0970567	0.718236	0.914947	62.009	62.8852	61.1329	73	55	71	76	54	46
Olfr868	-0.0532004	0.719361	0.914947	234.109	234.004	234.213	264	234	243	223	212	232
Olfr1216	-0.0869345	0.719669	0.914947	123.314	123.486	123.143	126	146	120	167	73	119
Olfr561	-0.100644	0.722137	0.916679	62.0878	63.4094	60.7663	81	75	44	86	42	49
Olfr788	-0.045801	0.72341	0.916679	294.279	293.359	295.199	304	316	311	315	245	286
Olfr1102	-0.129432	0.723561	0.916679	36.7112	38.0577	35.3648	49	47	24	47	21	35
Olfr1415	-0.0753855	0.724863	0.917112	120.785	121.363	120.208	102	140	145	125	125	92
Olfr915	0.447338	0.72559	0.917112	2.17089	1.58594	2.75584	2	3	0	2	0	6
Olfr399	-0.120356	0.72696	0.917776	31.2635	31.9976	30.5294	40	36	25	43	20	26
Olfr96	-0.0859202	0.727964	0.917978	71.6605	72.5295	70.7915	78	66	86	73	66	63
Olfr402	-0.186678	0.730472	0.920073	9.97125	10.6457	9.29681	8	18	8	12	6	9
Olfr791	-0.0751404	0.732386	0.921177	110.997	112.971	109.022	149	121	86	128	86	100
Olfr1316	-0.0943025	0.733044	0.921177	71.8714	72.2377	71.505	79	58	92	108	49	52
Olfr1080	-0.0768593	0.735596	0.923317	84.652	85.1829	84.121	80	89	102	84	64	93
Olfr430	-0.103908	0.738488	0.924834	74.9273	76.826	73.0287	102	94	46	108	41	65
Olfr1278	0.0870411	0.739903	0.924834	154.291	146.258	162.324	63	202	206	103	241	105
Olfr735	-0.101212	0.740262	0.924834	46.6042	47.3992	45.8092	42	48	61	56	38	38
Olfr948	-0.146365	0.740448	0.924834	25.9701	26.895	25.0453	32	36	17	24	15	33
Olfr1032	-0.070908	0.742301	0.924834	126.332	128.462	124.202	167	140	98	133	103	120
Olfr183	-0.070402	0.742546	0.924834	219.984	210.004	229.964	159	253	259	129	346	159
Olfr213	-0.04089	0.74276	0.924834	343.945	342.636	345.254	386	352	347	353	297	337
Olfr281	-0.064479	0.745057	0.926144	557.64	556.506	558.774	306	739	742	426	769	363
Olfr360	0.0724739	0.746774	0.926144	104.524	99.5488	109.499	102	112	102	135	75	107
Olfr873	-0.0606946	0.74712	0.926144	164.11	163.71	164.509	152	161	208	192	103	181
Olfr275	-0.248633	0.74722	0.926144	3.86833	4.06796	3.66869	3	6	4	7	1	3
Olfr373	-0.146217	0.749313	0.927359	14.8625	15.1348	14.5902	16	18	14	23	7	13
Olfr458	0.172587	0.749907	0.927359	7.39654	6.89946	7.89363	6	4	12	10	4	9
Olfr517	-0.152387	0.75336	0.929829	15.9714	16.9114	15.0315	26	18	9	14	11	18
Olfr1322	0.109578	0.753978	0.929829	78.7685	76.9846	80.5523	56	135	55	79	57	95
Olfr1368	-0.0753923	0.75447	0.929829	85.2062	85.9552	84.4572	100	72	100	74	75	91
Olfr993	-0.335061	0.756082	0.93076	1.16026	1.30109	1.01943	3	1	0	2	1	0
Olfr309	0.0318592	0.760668	0.933982	565.77	549.051	582.488	602	551	587	621	475	574
Olfr20	-0.0731241	0.760819	0.933982	106.421	107.947	104.896	145	105	90	108	78	115
Olfr1283	0.115129	0.761277	0.933982	29.5096	27.5703	31.4489	22	34	32	43	27	21
Olfr49	0.0711354	0.766406	0.938463	140.698	133.517	147.879	121	170	134	146	95	184
Olfr743	0.0637189	0.766656	0.938463	298.003	291.346	304.659	130	369	439	212	401	236
Olfr1090	-0.0748783	0.768062	0.938478	65.9036	66.3697	65.4376	77	66	67	79	48	62
Olfr599	-0.0774351	0.768395	0.938478	107.383	108.692	106.074	150	114	78	139	60	110
Olfr457	-0.0795116	0.771909	0.941712	55.3973	55.6355	55.1592	53	42	82	48	34	76
Olfr215	0.06347	0.773758	0.942417	98.3219	94.5414	102.102	111	103	85	117	78	99
Olfr1201	-0.138401	0.774221	0.942417	20.209	19.9128	20.5051	10	31	23	18	33	6
Olfr857	0.130894	0.777103	0.944867	20.942	19.4206	22.4633	15	31	16	37	15	14
Olfr945	-0.257973	0.779144	0.94629	3.5286	3.71148	3.34573	1	5	6	7	2	1
Olfr816	0.0780925	0.786641	0.948194	55.8814	52.9694	58.7933	56	61	51	81	41	49
Olfr132	-0.0596796	0.786731	0.948194	93.3139	93.2916	93.3362	98	91	107	83	87	95
Olfr267	-0.0746215	0.786919	0.948194	75.698	75.738	75.6579	70	90	81	88	46	85
Olfr777	-0.0478095	0.787396	0.948194	178.208	177.556	178.861	165	189	211	209	130	177
Olfr127	-0.102487	0.788299	0.948194	49.2464	49.4046	49.0883	36	51	71	53	61	25
Olfr907	0.16763	0.788939	0.948194	6.52555	5.93525	7.11586	4	8	7	12	4	5
Olfr720	-0.0742936	0.789725	0.948194	119.682	119.108	120.256	73	125	184	80	167	87
Olfr1086	0.09261	0.789764	0.948194	29.0687	27.5524	30.5851	34	32	21	44	23	22
Olfr1079	-0.0658009	0.789955	0.948194	81.4224	82.5925	80.2523	99	103	59	96	67	68
Olfr986	-0.100078	0.790855	0.948194	24.4217	24.904	23.9394	26	32	21	27	17	25
Olfr1314	-0.190157	0.791073	0.948194	4.41581	4.70812	4.12349	4	8	3	5	2	5
Olfr668	-0.0627809	0.791743	0.948194	92.1171	93.0127	91.2214	124	100	69	122	63	80
Olfr214	-0.0663742	0.792648	0.948194	79.5625	79.9832	79.1417	68	89	98	94	63	71
Olfr77	-0.0759454	0.792924	0.948194	86.5061	87.8747	85.1375	128	83	65	94	51	101
Olfr509	-0.0760379	0.795361	0.950063	67.3729	67.8032	66.9426	72	84	59	73	44	76
Olfr2	-0.0669327	0.796635	0.95054	62.9449	63.2215	62.6683	61	67	73	70	51	59
Olfr1411	-0.0622267	0.799894	0.953383	71.0851	71.3395	70.8307	79	77	70	75	58	70
Olfr287	0.077033	0.804947	0.958355	132.619	124.96	140.279	47	160	196	75	227	83
Olfr355	-0.103014	0.806534	0.958822	16.7466	16.7427	16.7506	19	19	15	27	13	9
Olfr1261	-0.0350968	0.807104	0.958822	275.833	275.101	276.564	323	311	236	282	256	251
Olfr1263	0.0338142	0.810131	0.961304	306.78	295.274	318.285	255	347	339	289	358	252
Olfr427	-0.254043	0.811649	0.961304	1.16647	1.27799	1.05495	2	2	0	1	1	1
Olfr774	0.101111	0.812752	0.961304	13.9409	13.2444	14.6375	14	17	11	16	12	14
Olfr671	0.0796761	0.812964	0.961304	33.4966	32.1444	34.8488	46	37	18	55	25	22
Olfr681	-0.0585334	0.813615	0.961304	168.079	171.984	164.174	252	177	111	181	114	178
Olfr576	0.0831229	0.814643	0.961474	28.3566	27.1509	29.5624	30	34	22	33	23	29
Olfr348	-0.0666222	0.816971	0.963176	46.8233	47.2017	46.4449	59	51	39	58	38	38
Olfr982	-0.0580729	0.8191	0.964639	85.579	86.6333	84.5248	114	99	60	109	60	76
Olfr733	0.0339495	0.820706	0.965484	239.425	231.202	247.648	250	227	256	292	165	259
Olfr1325	0.0338067	0.821606	0.965498	215.124	208.263	221.985	216	205	240	255	161	224
Olfr1241	0.0367085	0.824313	0.966191	200.2	194.196	206.204	231	194	189	196	189	202
Olfr658	-0.0632077	0.824746	0.966191	65.8682	66.0757	65.6607	77	77	55	54	61	71
Olfr1338	-0.0861846	0.826458	0.966191	41.4031	41.7507	41.0554	49	57	26	65	20	36
Olfr473	0.0978429	0.827582	0.966191	14.9081	14.2861	15.5302	19	17	9	19	10	16
Olfr1264	0.0248802	0.829222	0.966191	729.153	707.453	750.853	561	703	995	553	773	788
Olfr1427	0.0265141	0.829434	0.966191	513.282	496.463	530.1	510	514	552	521	390	608
Olfr684	-0.0620166	0.829535	0.966191	64.7888	64.4828	65.0949	75	68	61	71	39	78
Olfr68	-0.0457222	0.830492	0.966191	163.488	163.577	163.398	209	177	130	196	106	171
Olfr1294	-0.0299865	0.830634	0.966191	249.12	247.024	251.216	255	274	255	269	209	242
Olfr314	0.0410446	0.831432	0.966191	259.694	250.504	268.883	197	256	347	246	310	203
Olfr894	-0.234337	0.831973	0.966191	2.40892	2.52705	2.29078	3	0	5	6	1	0
Olfr1115	-0.0692071	0.833645	0.96706	32.6122	32.7089	32.5156	31	44	29	38	33	22
Olfr536	0.0242579	0.834501	0.96706	3434.26	3321.81	3546.7	2806	3680	4106	3029	3913	3063
Olfr1462	0.226653	0.837264	0.967597	1.34505	1.25139	1.4387	1	0	3	1	2	1
Olfr1499	0.137121	0.837478	0.967597	8.28946	7.90427	8.67465	9	14	2	17	3	6
Olfr118	-0.0886227	0.838437	0.967597	14.9819	15.296	14.6679	10	18	21	16	13	13
Olfr651	-0.0408663	0.839214	0.967597	127.279	127.726	126.831	162	139	102	142	107	115
Olfr606	-0.079719	0.840947	0.967597	36.133	37.1142	35.1517	48	48	21	30	29	41
Olfr1364	0.0226533	0.841158	0.967597	447.647	435.085	460.208	463	421	496	460	356	502
Olfr317	-0.0695286	0.841649	0.967597	37.5868	37.848	37.3256	53	47	19	64	24	22
Olfr393	0.0410284	0.842806	0.967597	137.019	132.504	141.535	119	132	171	174	105	130
Olfr1238	-0.042275	0.843834	0.967597	167.053	164.743	169.363	168	188	167	202	100	189
Olfr250	0.0552248	0.843866	0.967597	159.036	156.844	161.228	222	183	88	194	102	171
Olfr444	-0.108801	0.845612	0.968577	11.8924	12.0415	11.7432	15	17	6	21	4	10
Olfr32	-0.0273199	0.852778	0.974598	233.964	231.556	236.372	238	254	243	242	189	246
Olfr1320	0.0459215	0.853394	0.974598	69.3431	66.9104	71.7758	74	66	72	70	60	75
Olfr1262	-0.0243127	0.854064	0.974598	532.458	526.476	538.44	567	599	503	518	440	580
Olfr15	-0.0183949	0.854455	0.974598	1431.76	1411.53	1452	1407	1522	1555	1683	1143	1354
Olfr11	-0.0376555	0.857286	0.976802	124.138	123.367	124.909	134	140	117	127	96	135
Olfr178	0.069821	0.858631	0.977311	18.1434	17.4244	18.8624	22	15	18	19	15	20
Olfr1500	-0.03909	0.862799	0.979636	93.4386	93.502	93.3752	132	90	72	131	63	78
Olfr1214	0.0455867	0.86282	0.979636	59.1295	57.2257	61.0333	67	62	52	68	53	54
Olfr976	-0.0573658	0.863866	0.979636	64.105	64.4493	63.7608	99	66	37	100	29	59
Olfr351	-0.0573138	0.865715	0.979636	31.8273	31.9029	31.7517	36	38	27	41	23	28
Olfr820	0.0233615	0.866039	0.979636	346.583	336.47	356.695	322	343	405	421	253	356
Olfr635	-0.0522748	0.866081	0.979636	50.5553	50.4186	50.6921	65	54	40	70	29	49
Olfr837	0.0875013	0.868164	0.980972	10.0454	9.64789	10.4429	5	14	12	13	10	7
Olfr382	-0.14902	0.871336	0.983533	4.01249	4.1095	3.91549	5	0	8	10	1	1
Olfr648	-0.0450003	0.875594	0.987315	87.7546	87.7141	87.7951	121	91	64	107	49	99
Olfr1221	-0.05808	0.877139	0.987852	31.6156	31.4048	31.8264	41	33	25	42	15	36
Olfr1151	-0.054446	0.877889	0.987852	23.6408	23.6652	23.6164	26	22	27	27	18	23
Olfr1433	0.0637658	0.880549	0.988415	25.481	24.8636	26.0984	24	39	16	35	16	25
Olfr722	-0.0207162	0.880906	0.988415	244.807	241.44	248.175	228	256	284	227	211	269
Olfr224	-0.0187492	0.881117	0.988415	337.922	331.81	344.033	317	397	341	333	373	269
Olfr704	0.0533397	0.885438	0.992	21.653	20.829	22.4769	23	20	23	21	20	23
Olfr342	0.0193574	0.886545	0.992	257.963	251.258	264.668	266	256	275	305	217	239
Olfr829	-0.106977	0.888311	0.992	4.76552	4.73122	4.79982	5	7	3	5	1	8
Olfr1182	-0.0522904	0.888454	0.992	47.4923	46.9029	48.0816	34	52	64	73	28	40
Olfr1356	0.0526153	0.888876	0.992	20.0813	19.4066	20.7559	15	19	28	18	18	23
Olfr1039	-0.0445227	0.89119	0.993293	44.1174	44.1564	44.0783	47	57	36	49	31	47
Olfr384	-0.0771715	0.891862	0.993293	7.94691	8.25725	7.63657	11	12	3	9	6	7
Olfr1228	-0.0166608	0.895013	0.993357	600.614	581.607	619.621	312	830	726	328	866	518
Olfr869	-0.0406041	0.895944	0.993357	37.8071	37.5936	38.0206	43	37	39	47	27	36
Olfr39	-0.0589458	0.896996	0.993357	18.0263	17.3539	18.6987	19	17	19	25	5	25
Olfr266	0.0432777	0.897701	0.993357	28.6365	27.7054	29.5675	28	25	35	32	22	31
Olfr572	-0.0478543	0.899587	0.993357	44.1828	45.77	42.5956	76	48	19	64	23	38
Olfr5	-0.0308555	0.899898	0.993357	70.8037	69.9656	71.6418	73	76	73	65	73	65
Olfr591	0.0371116	0.90049	0.993357	73.2015	70.9259	75.477	87	82	55	84	47	87
Olfr1179	-0.0649966	0.901125	0.993357	25.0429	25.7209	24.3649	9	34	40	27	31	11
Olfr617	-0.0423588	0.902996	0.993357	55.723	57.0127	54.4333	70	80	30	71	37	50
Olfr354	0.0312519	0.903136	0.993357	116.357	111.745	120.969	98	131	127	156	70	126
Olfr117	-0.015785	0.903162	0.993357	324.909	321.011	328.807	368	335	313	360	264	320
Olfr167	-0.0140589	0.903521	0.993357	389.507	383.902	395.112	364	419	438	390	353	384
Olfr299	-0.0516416	0.9038	0.993357	28.157	26.7666	29.5473	27	30	28	53	11	24
Olfr916	-0.04422	0.905702	0.994443	25.4385	25.3737	25.5033	33	26	21	31	15	28
Olfr1349	-0.0152966	0.908419	0.995705	321.262	317.397	325.127	282	341	388	342	273	316
Olfr657	-0.0319113	0.90957	0.995705	64.8378	65.4893	64.1864	91	72	43	77	51	57
Olfr1535	-0.0387305	0.911291	0.995705	25.1139	24.9917	25.236	30	24	25	32	19	22
Olfr1317	-0.0367892	0.911347	0.995705	32.0489	32.0062	32.0916	28	30	44	34	26	32
Olfr223	0.110396	0.911807	0.995705	3.36544	2.8154	3.91549	2	5	2	10	1	1
Olfr1323	-0.0232965	0.912348	0.995705	105.065	103.229	106.901	102	111	115	94	116	92
Olfr577	-0.0312829	0.91512	0.997729	65.5225	64.9629	66.0821	82	71	52	83	39	70
Olfr1286	-0.0268836	0.919069	1	76.7547	76.2981	77.2112	69	65	109	100	53	71
Olfr1211	-0.0217956	0.9199	1	118.514	117.534	119.494	70	153	154	90	142	103
Olfr1412	-0.0138019	0.924258	1	225.784	223.232	228.336	264	204	238	248	199	207
Olfr385	-0.0979898	0.925084	1	1.96764	2.17873	1.75654	1	6	0	2	2	1
Olfr620	0.0299982	0.925632	1	37.4291	36.9899	37.8683	56	38	22	53	29	28
Olfr688	0.103326	0.926062	1	1.01191	0.968879	1.05495	2	0	1	1	1	1
Olfr741	0.015404	0.9261	1	566.446	559.551	573.34	333	684	778	488	658	469
Olfr1416	-0.0215117	0.926901	1	142.056	141.865	142.247	99	158	197	158	133	116
Olfr961	-0.0233398	0.927596	1	100.58	101.748	99.4108	155	106	58	141	64	85
Olfr1328	0.0251681	0.929649	1	111.845	109.919	113.772	123	149	76	125	76	127
Olfr286	-0.0171559	0.930155	1	420.647	403.66	437.634	278	473	541	305	618	293
Olfr1229	0.0148278	0.930578	1	169.663	165.351	173.975	155	191	180	163	148	185
Olfr1245	0.0941186	0.932937	1	1.01614	0.946944	1.08534	1	2	0	1	2	0
Olfr1260	0.015634	0.93368	1	292.627	281.723	303.531	163	375	366	212	422	210
Olfr1489	-0.0199977	0.933717	1	71.7727	70.938	72.6073	75	79	71	79	63	66
Olfr474	0.126139	0.936014	1	0.345267	0.306782	0.383753	0	0	1	0	1	0
Olfr1453	0.122769	0.936078	1	0.330654	0.307948	0.35336	0	1	0	0	0	1
Olfr670	0.0265027	0.936439	1	50.3584	50.4457	50.271	79	49	30	58	36	51
Olfr1354	-0.0131243	0.936778	1	176.471	174.299	178.643	209	163	179	201	160	151
Olfr1024	0.0509591	0.93702	1	5.91619	6.05891	5.77346	9	10	0	10	4	3
Olfr1252	-0.0128222	0.937729	1	221.165	216.685	225.646	246	226	214	300	148	208
Olfr1137	0.0219614	0.938506	1	53.9741	53.1363	54.8119	76	51	40	72	39	48
Olfr1297	0.0121833	0.939984	1	236.375	230.387	242.363	253	255	222	295	169	237
Olfr1418	-0.0180579	0.940592	1	114.328	112.875	115.78	145	122	89	152	69	116
Olfr483	0.0288616	0.941171	1	21.6843	21.1197	22.2488	22	27	18	24	16	24
Olfr814	0.0290583	0.941853	1	18.7247	17.9663	19.4831	19	16	22	18	11	27
Olfr944	-0.0341474	0.942353	1	10.1509	10.0702	10.2317	10	9	13	9	10	10
Olfr574	-0.0939471	0.94348	1	0.637335	0.638996	0.635675	1	1	0	2	0	0
Olfr1475	0.10853	0.945165	1	0.330071	0.306782	0.35336	0	0	1	0	0	1
Olfr1402	0.0505095	0.948201	1	4.87188	5.13507	4.60868	9	7	0	3	4	6
Olfr170	-0.0131915	0.949057	1	121.107	119.564	122.65	143	112	123	117	103	130
Olfr639	-0.0215189	0.950234	1	54.0706	51.5083	56.6328	59	61	43	100	27	41
Olfr729	-0.0107863	0.950636	1	291.044	284.36	297.728	159	352	402	184	396	247
Olfr1465	0.0581243	0.951801	1	1.32481	1.27683	1.37279	2	1	1	2	1	1
Olfr1426	0.00803866	0.952495	1	432.485	422.972	441.998	494	438	406	476	322	473
Olfr1107	-0.0160459	0.953099	1	56.2774	55.6044	56.9504	51	57	69	61	50	52
Olfr1288	-0.0188017	0.953358	1	34.401	34.041	34.761	36	30	42	41	29	30
Olfr320	0.0716961	0.953645	1	0.98202	0.944612	1.01943	1	0	2	2	1	0
Olfr1504	0.069447	0.955324	1	0.955273	0.921511	0.989035	0	1	2	2	0	1
Olfr1423	-0.00893407	0.957086	1	243.118	239.019	247.216	228	285	247	288	181	244
Olfr1348	-0.00550358	0.95782	1	650.655	638.143	663.167	652	670	704	624	645	615
Olfr1204	-0.0221971	0.959343	1	95.9098	91.6238	100.196	41	110	144	76	165	36
Olfr1318	-0.010297	0.961634	1	115.263	113.178	117.349	107	120	133	138	81	120
Olfr60	-0.00518869	0.962963	1	489.754	481.175	498.333	475	497	557	526	397	506
Olfr1199	0.00935903	0.963117	1	119.495	116.141	122.848	75	170	127	88	157	98
Olfr180	0.00863957	0.963309	1	171.217	166.466	175.968	176	184	168	233	121	157
Olfr1447	-0.0104329	0.965002	1	74.3997	73.5256	75.2738	94	61	77	94	52	72
Olfr513	-0.0306945	0.965719	1	4.6231	4.44637	4.79982	6	5	3	5	1	8
Olfr790	0.0139889	0.966858	1	32.4865	31.7064	33.2666	28	36	37	39	24	33
Olfr1305	-0.012051	0.967617	1	55.5676	54.8476	56.2876	45	59	71	68	48	46
Olfr1307	-0.0115647	0.968513	1	43.2094	42.5553	43.8634	45	41	49	42	39	44
Olfr325	-0.00550071	0.972603	1	181.435	178.304	184.566	183	193	190	190	156	182
Olfr292	0.0102123	0.973031	1	40.0384	38.922	41.1548	34	48	42	33	44	39
Olfr307	-0.0101575	0.973411	1	48.0699	46.9826	49.1571	63	43	42	70	25	49
Olfr1230	0.0494272	0.974015	1	0.312892	0.307948	0.317837	0	1	0	1	0	0
Olfr883	0.0494272	0.974015	1	0.312892	0.307948	0.317837	0	1	0	1	0	0
Olfr612	-0.0100363	0.974625	1	44.3663	44.3786	44.354	70	32	37	56	25	48
Olfr575	0.00878511	0.977245	1	48.7525	48.1319	49.3731	72	52	27	79	31	35
Olfr996	0.0139994	0.979606	1	8.19809	7.89727	8.49891	9	8	8	12	3	10
Olfr315	0.00644769	0.979996	1	100.588	98.2611	102.916	61	124	130	88	129	72
Olfr905	-0.0103082	0.980719	1	28.8936	27.8846	29.9025	35	33	20	43	11	34
Olfr535	-0.00292278	0.980786	1	350.128	343.618	356.638	338	352	402	367	281	374
Olfr742	0.00337231	0.986299	1	165.977	161.929	170.025	114	214	190	153	204	122
Olfr1295	-0.00414561	0.987046	1	72.2736	70.7728	73.7744	68	83	74	70	56	85
Olfr823	-0.00787991	0.988137	1	11.3001	11.2373	11.3628	7	20	9	7	10	15
Olfr1351	0.0072244	0.988222	1	10.1613	10.2447	10.0778	17	13	2	19	5	6
Olfr512	-0.0111805	0.988542	1	3.25457	3.19382	3.31533	5	4	1	7	1	2
Olfr1163	0.0077496	0.988842	1	11.3886	11.2859	11.4913	9	20	7	19	5	10
Olfr524	0.00172647	0.988872	1	349.227	342.121	356.333	300	385	405	336	351	325
Olfr1023	0.00561004	0.989288	1	31.3964	29.8165	32.9762	39	28	27	46	11	40
Olfr1198	0.00244385	0.9907	1	98.1664	96.1378	100.195	88	109	109	94	93	98
Olfr482	-0.00425542	0.990916	1	26.7935	26.1057	27.4814	25	31	27	35	15	30
Olfr646	0.00314389	0.991419	1	49.2695	48.7484	49.7906	59	62	33	65	40	39
Olfr263	0.00243822	0.991634	1	131.454	129.022	133.886	62	174	179	88	183	101
Olfr190	-0.00172954	0.992487	1	202.634	199.899	205.369	123	229	289	152	238	186
Olfr1225	-0.00182099	0.994784	1	62.2074	61.0988	63.3161	75	60	58	60	49	72
Olfr1008	-3.17815e-16	1	1	0	0	0	0	0	0	0	0	0
Olfr1053	-3.17815e-16	1	1	0	0	0	0	0	0	0	0	0
Olfr1061	-3.17815e-16	1	1	0	0	0	0	0	0	0	0	0
Olfr1128	-3.17815e-16	1	1	0	0	0	0	0	0	0	0	0
Olfr1360	-3.17815e-16	1	1	0	0	0	0	0	0	0	0	0
Olfr1367	-3.17815e-16	1	1	0	0	0	0	0	0	0	0	0
Olfr1371	-3.17815e-16	1	1	0	0	0	0	0	0	0	0	0
Olfr1373	-3.17815e-16	1	1	0	0	0	0	0	0	0	0	0
Olfr176	-3.17815e-16	1	1	0	0	0	0	0	0	0	0	0
Olfr663	-3.17815e-16	1	1	0	0	0	0	0	0	0	0	0
Olfr761	-3.17815e-16	1	1	0	0	0	0	0	0	0	0	0
Olfr834	-3.17815e-16	1	1	0	0	0	0	0	0	0	0	0
Olfr891	-3.17815e-16	1	1	0	0	0	0	0	0	0	0	0
Olfr926	-3.17815e-16	1	1	0	0	0	0	0	0	0	0	0
